# Supplementary material for: Cobalt-catalysed nucleophilic fluorination in organic carbonates
Source: Royal Society of Chemistry journal article supplement (doi:10.1039/d3dt00731f), 2023-01-01
Supplement: d3dt00731f1.pdf [file d3dt00731f1.pdf]

*Supporting Information for*

# Cobalt-catalyzed nucleophilic fluorination in organic carbonates

*Susana García-Abellán,<sup>[a]</sup> Daniel Barrena-Espés,<sup>[b]</sup> Julen Munárriz,<sup>[b]</sup> Vincenzo Passarelli,<sup>[a]</sup> and Manuel Iglesias<sup>\*[a]</sup>*

[a] Instituto Síntesis Química y Catálisis Homogénea (ISQCH), Universidad de Zaragoza–CSIC, C/Pedro Cerbuna 12,50009 Zaragoza, Spain. E-mail: [miglesia@unizar.es](mailto:miglesia@unizar.es).

[b] Departamento Química Física y Analítica, Universidad de Oviedo, Avda. Julian Clavería 8, 33006, Oviedo, Spain.

## Table of Contents:

|                                                                                           |    |
|-------------------------------------------------------------------------------------------|----|
| 1. NMR Spectra.....                                                                       | 2  |
| NMR spectra of 1-((diphenylphosphanyl)methyl)- 1 <i>H</i> -benzo-1,2,3-triazole (1) ..... | 2  |
| NMR spectra of cobalt complex 2 .....                                                     | 6  |
| NMR spectra of cobalt complex 3 .....                                                     | 10 |
| 2. <sup>19</sup> F NMR Spectra of the fluorination reactions .....                        | 14 |
| Table 1.....                                                                              | 14 |
| Table 2.....                                                                              | 36 |
| Table 3.....                                                                              | 47 |
| 3. Synthesis and characterization of isovaleryl fluoride .....                            | 50 |
| 4. DFT calculations .....                                                                 | 53 |

## 1. NMR Spectra

NMR spectra of 1-((diphenylphosphanyl)methyl)-1*H*-benzo-1,2,3-triazole (**1**)

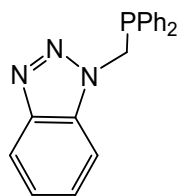

**1**

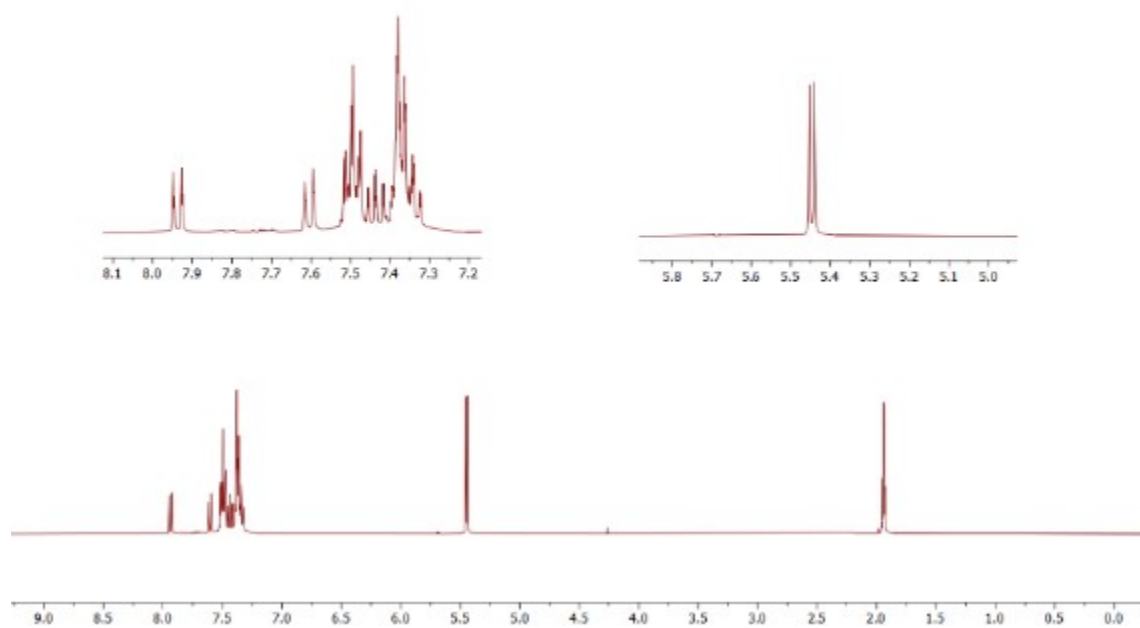

**Figure S1.** <sup>1</sup>H NMR of **1** in CD<sub>3</sub>CN.

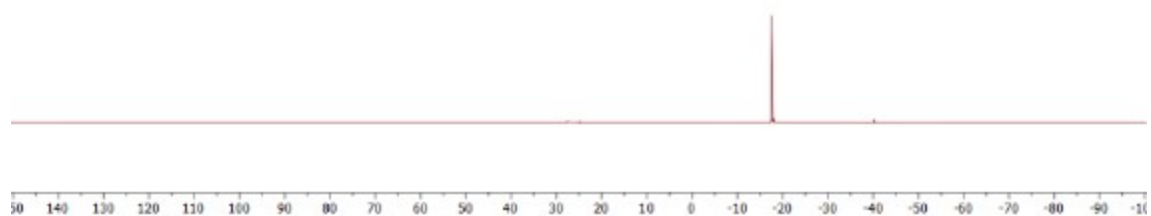

**Figure S2.**  $^{31}\text{P}\{^1\text{H}\}$  NMR of **1** in  $\text{CD}_3\text{CN}$ .

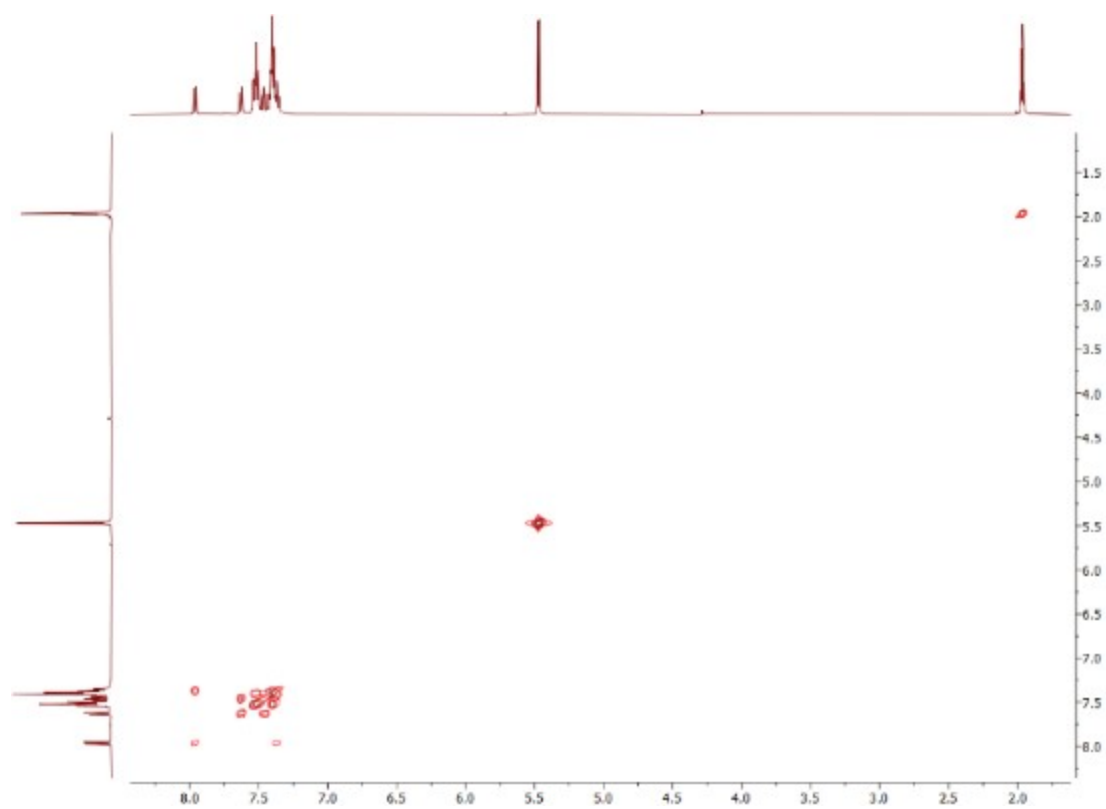

**Figure S3.**  $^1\text{H}$ - $^1\text{H}$  COSY of **1** in  $\text{CD}_3\text{CN}$ .

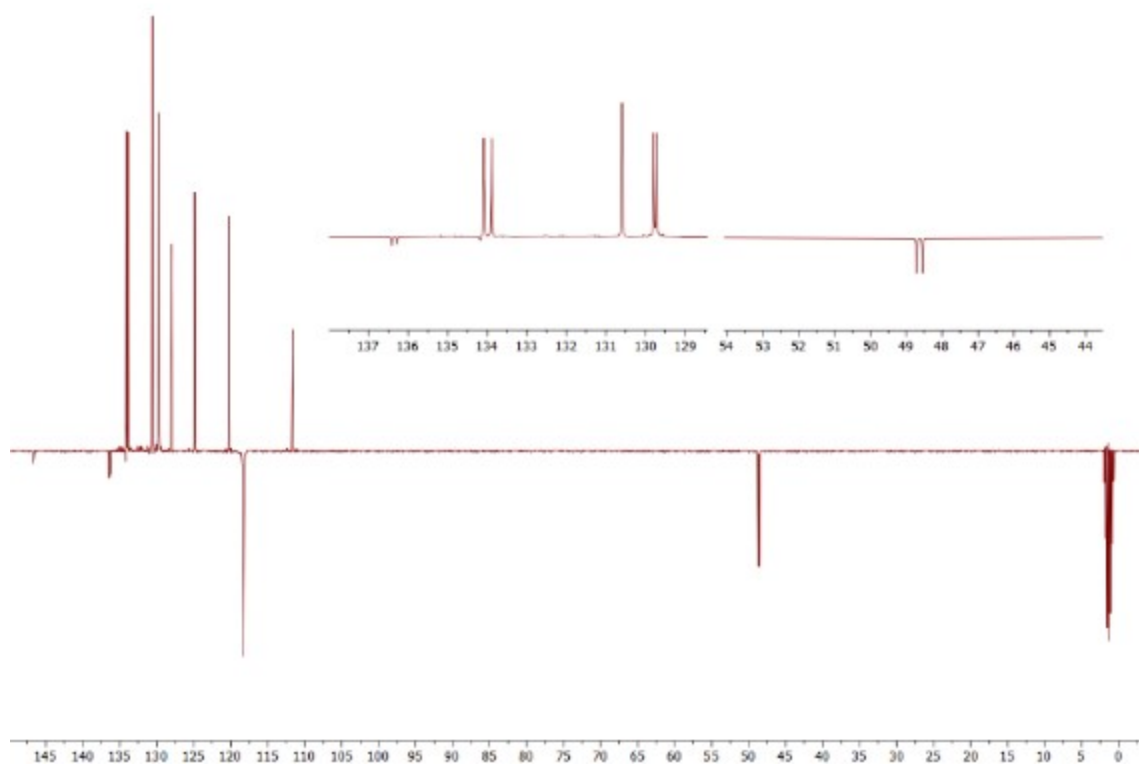

**Figure S4.** APT NMR of **1** in CD<sub>3</sub>CN.

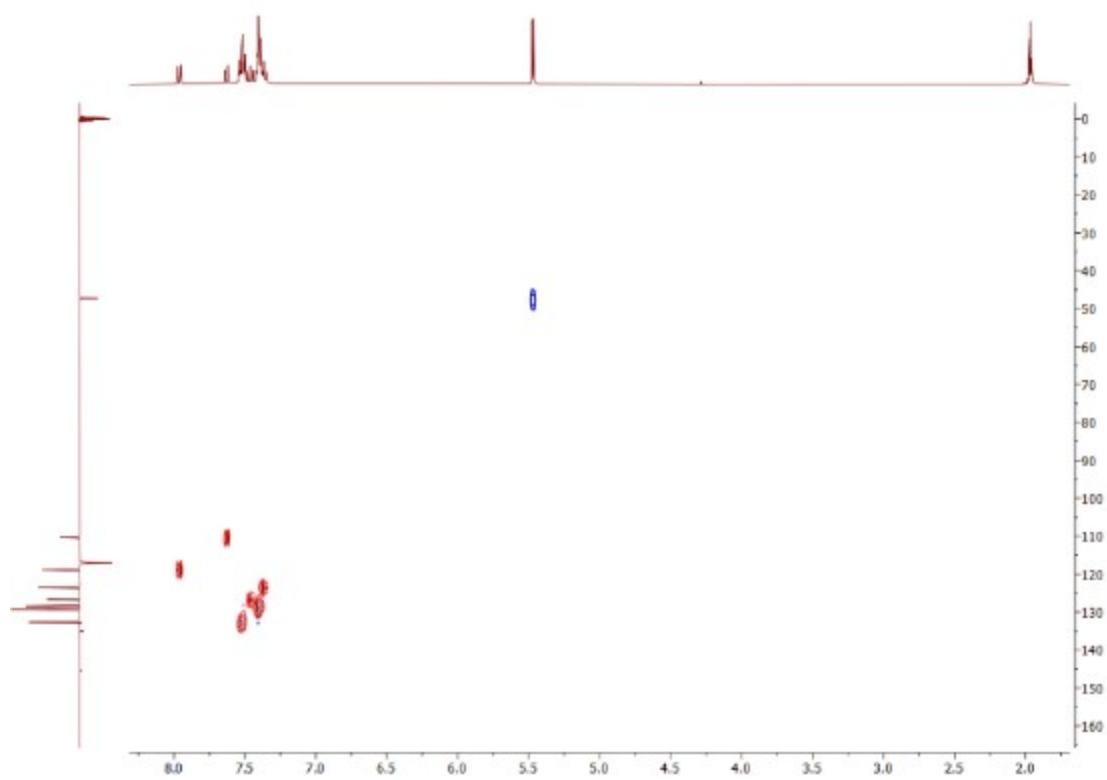

**Figure S5.**  $^1\text{H}$ - $^{13}\text{C}$  HSQC of **1** in  $\text{CD}_3\text{CN}$ .

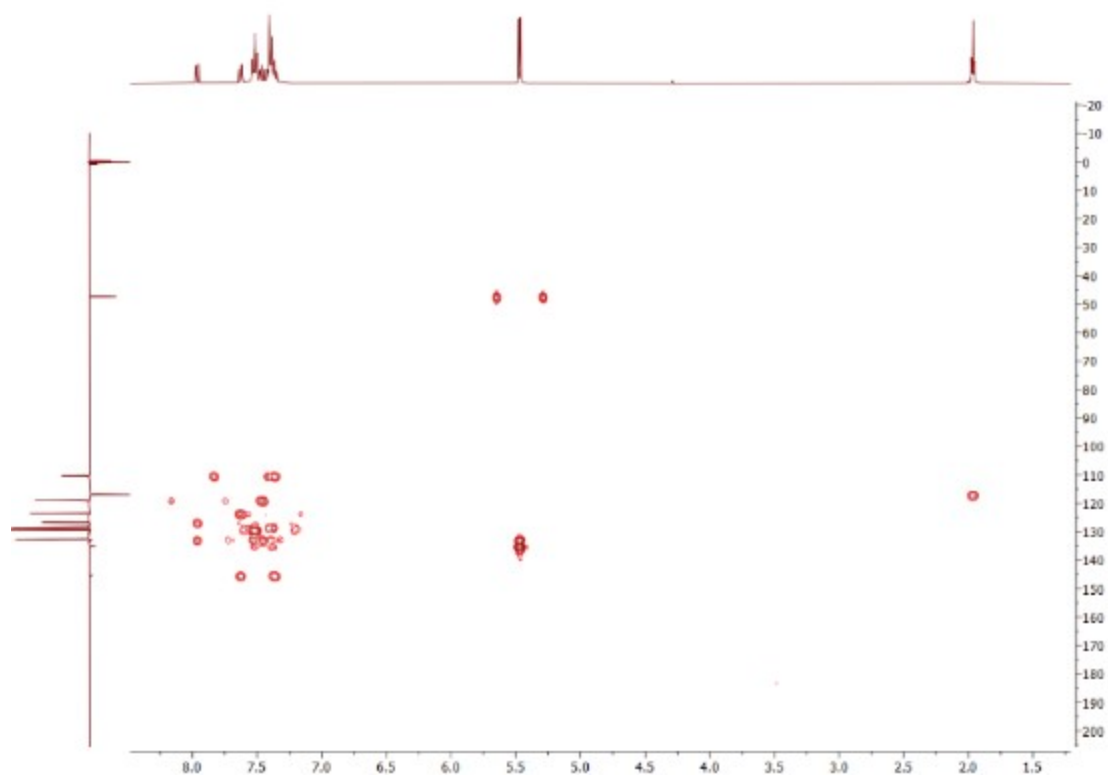

**Figure S6.**  $^1\text{H}$ - $^{13}\text{C}$  HMBC of **1** in  $\text{CD}_3\text{CN}$ .

## NMR spectra of cobalt complex 2

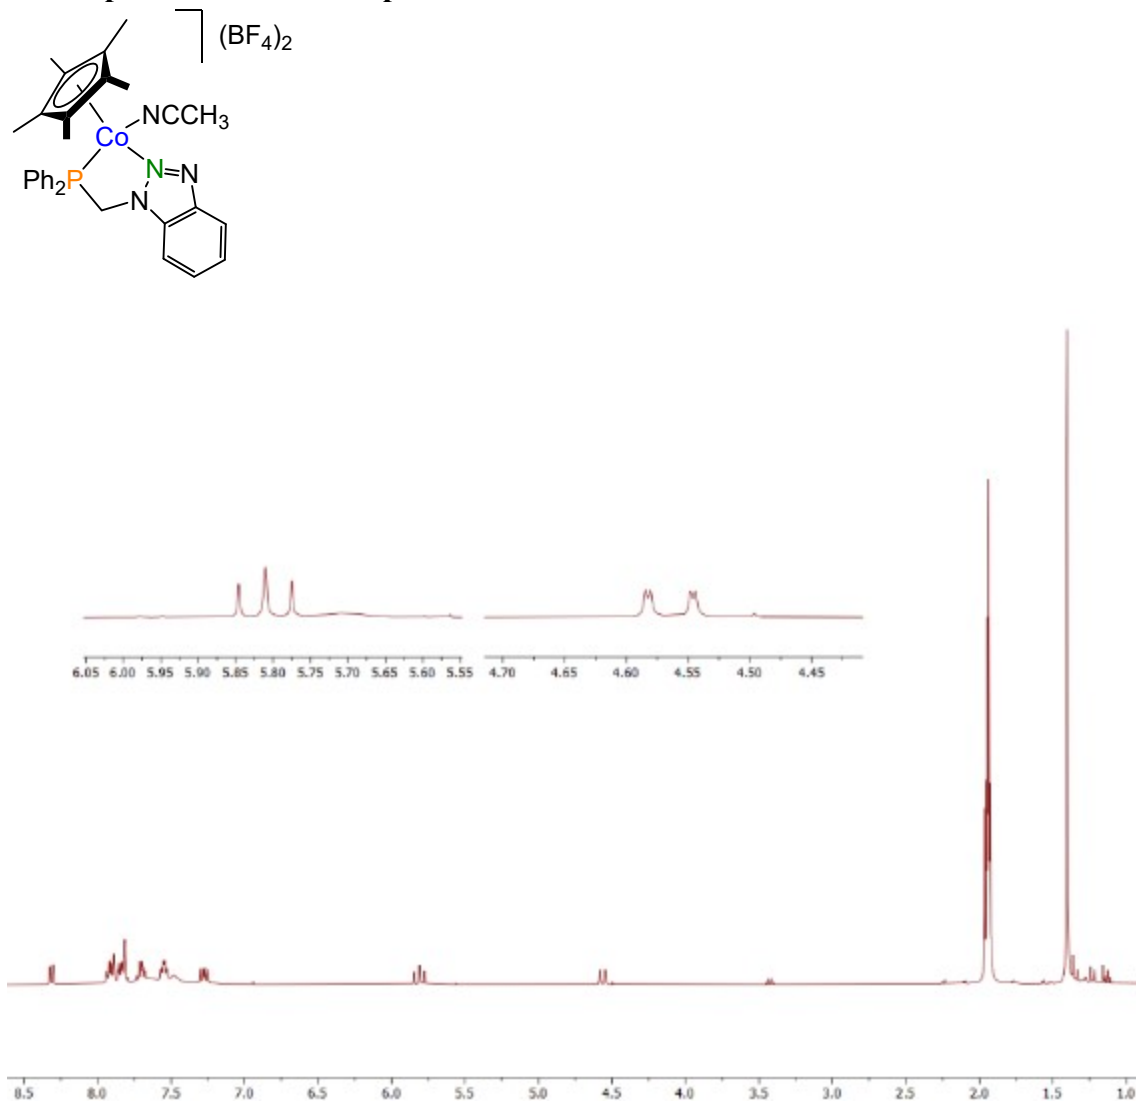

Figure S7.  $^1\text{H}$  NMR of 2 in  $\text{CD}_3\text{CN}$ .

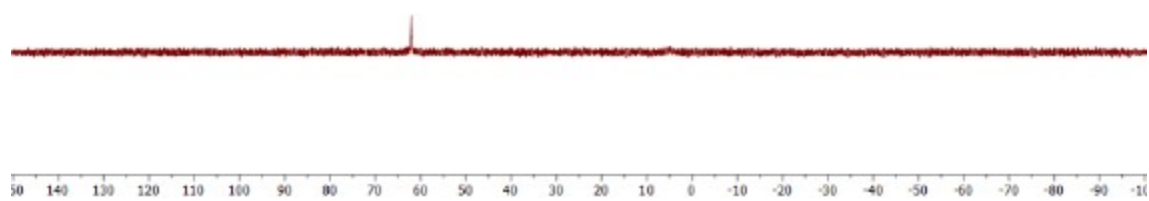

**Figure S8.**  $^{31}\text{P}\{^1\text{H}\}$  NMR of **2** in  $\text{CD}_3\text{CN}$ .

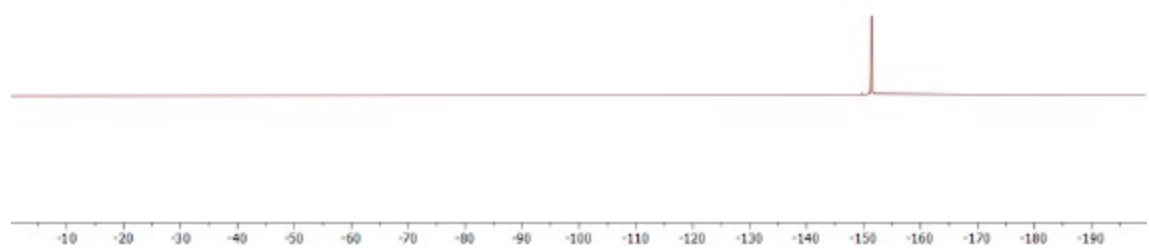

**Figure S9.**  $^{19}\text{F}\{^1\text{H}\}$  NMR of **2** in  $\text{CD}_3\text{CN}$ .

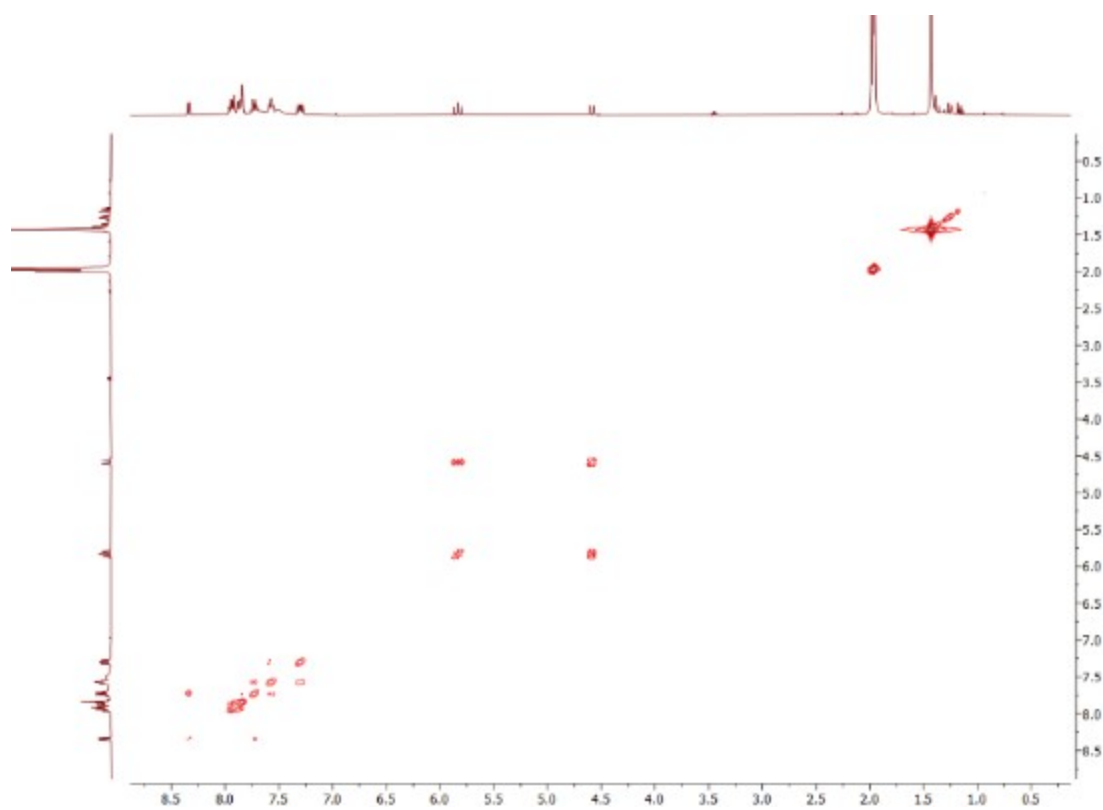

**Figure S10.**  $^1\text{H}$ - $^1\text{H}$  COSY of **2** in  $\text{CD}_3\text{CN}$ .

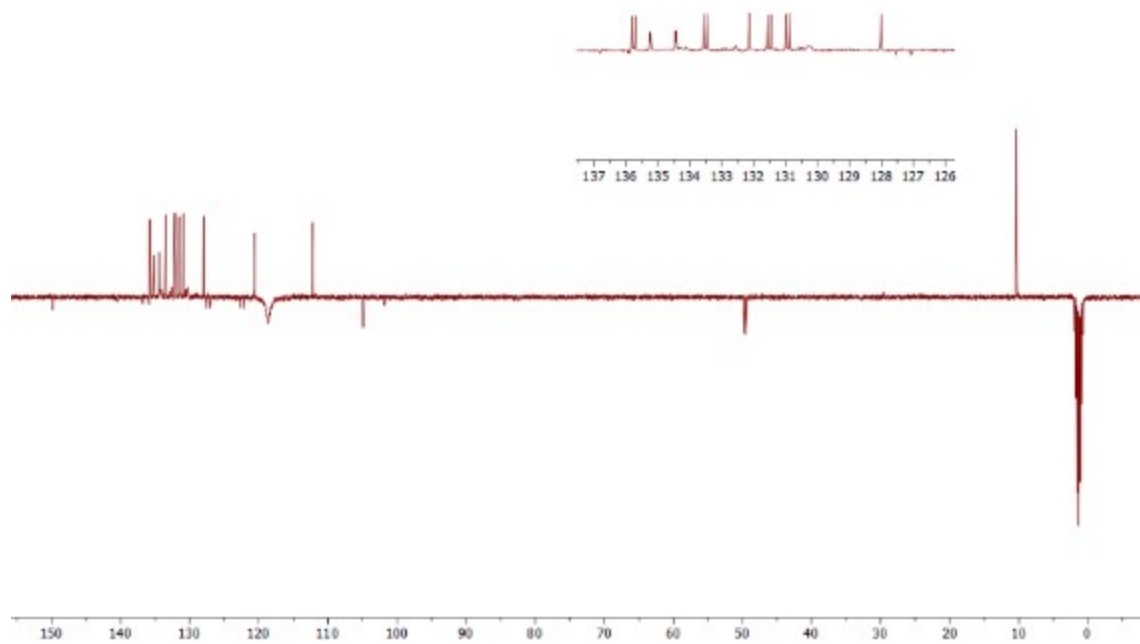

**Figure S11.** APT NMR of **2** in  $\text{CD}_3\text{CN}$ .



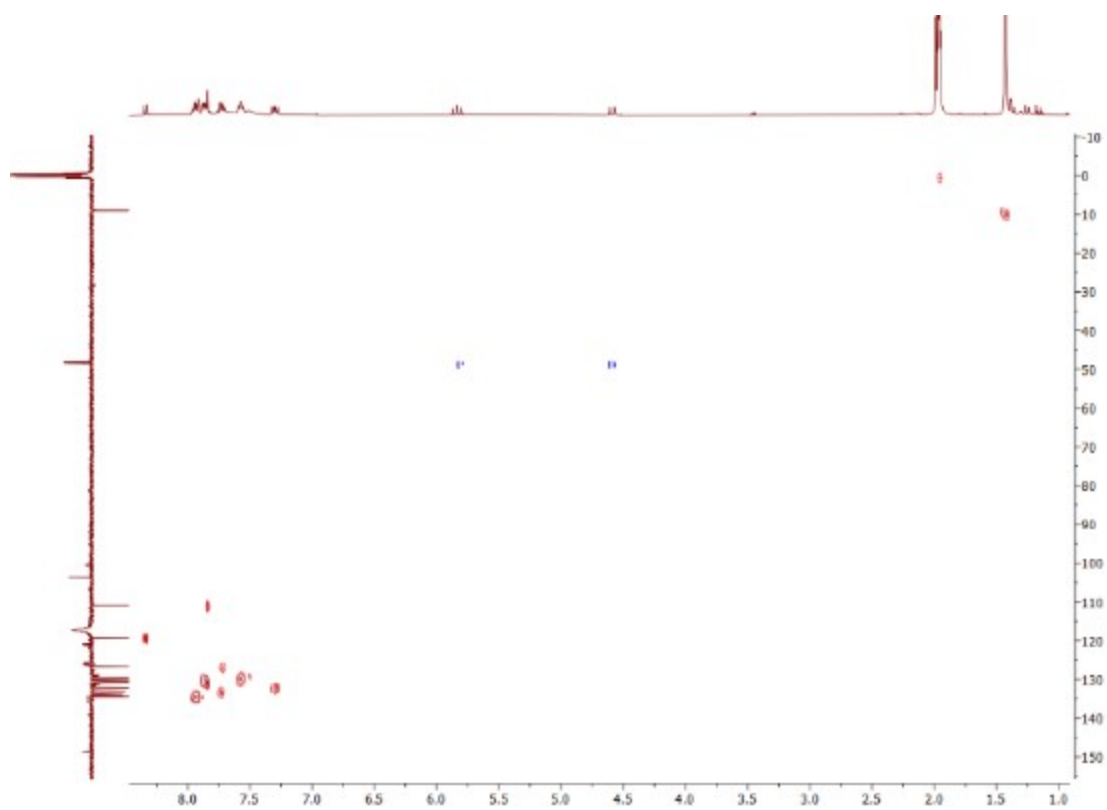

**Figure S12.**  $^1\text{H}$ - $^{13}\text{C}$  HSQC of **2** in  $\text{CD}_3\text{CN}$ .

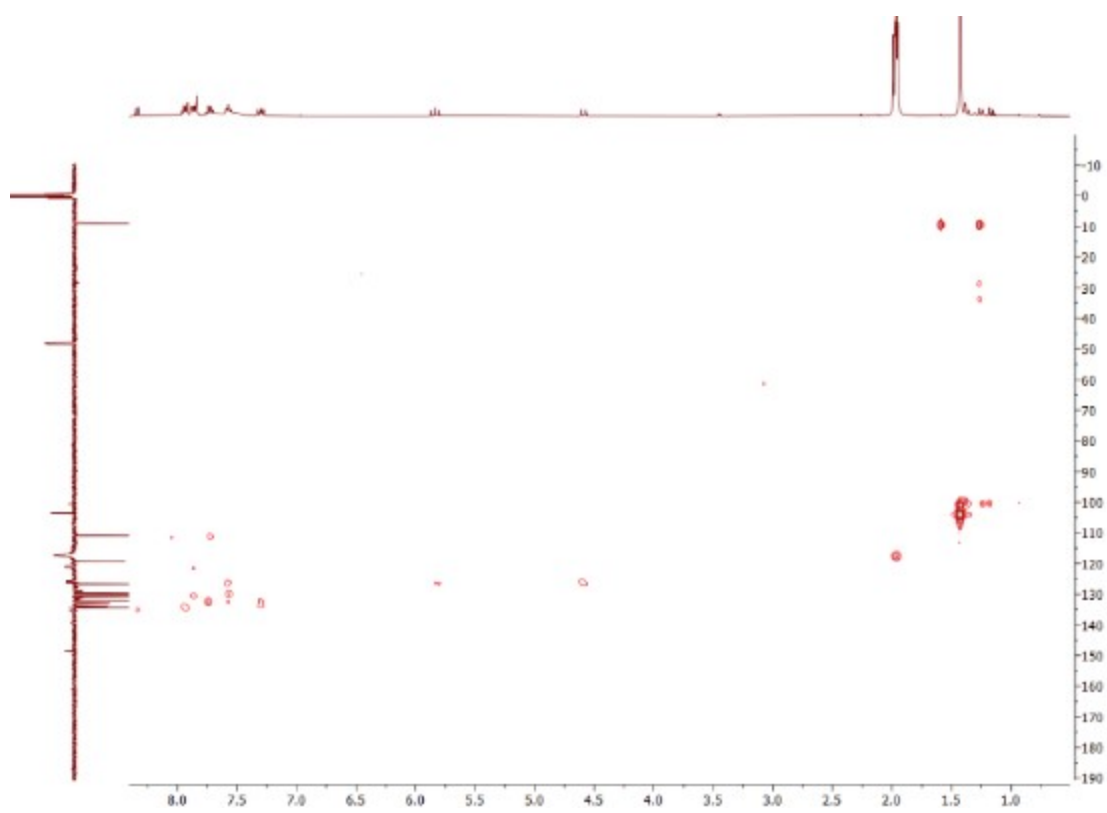

**Figure S13.**  $^1\text{H}$ - $^{13}\text{C}$  HMBC of **2** in  $\text{CD}_3\text{CN}$ .

### NMR spectra of cobalt complex 3

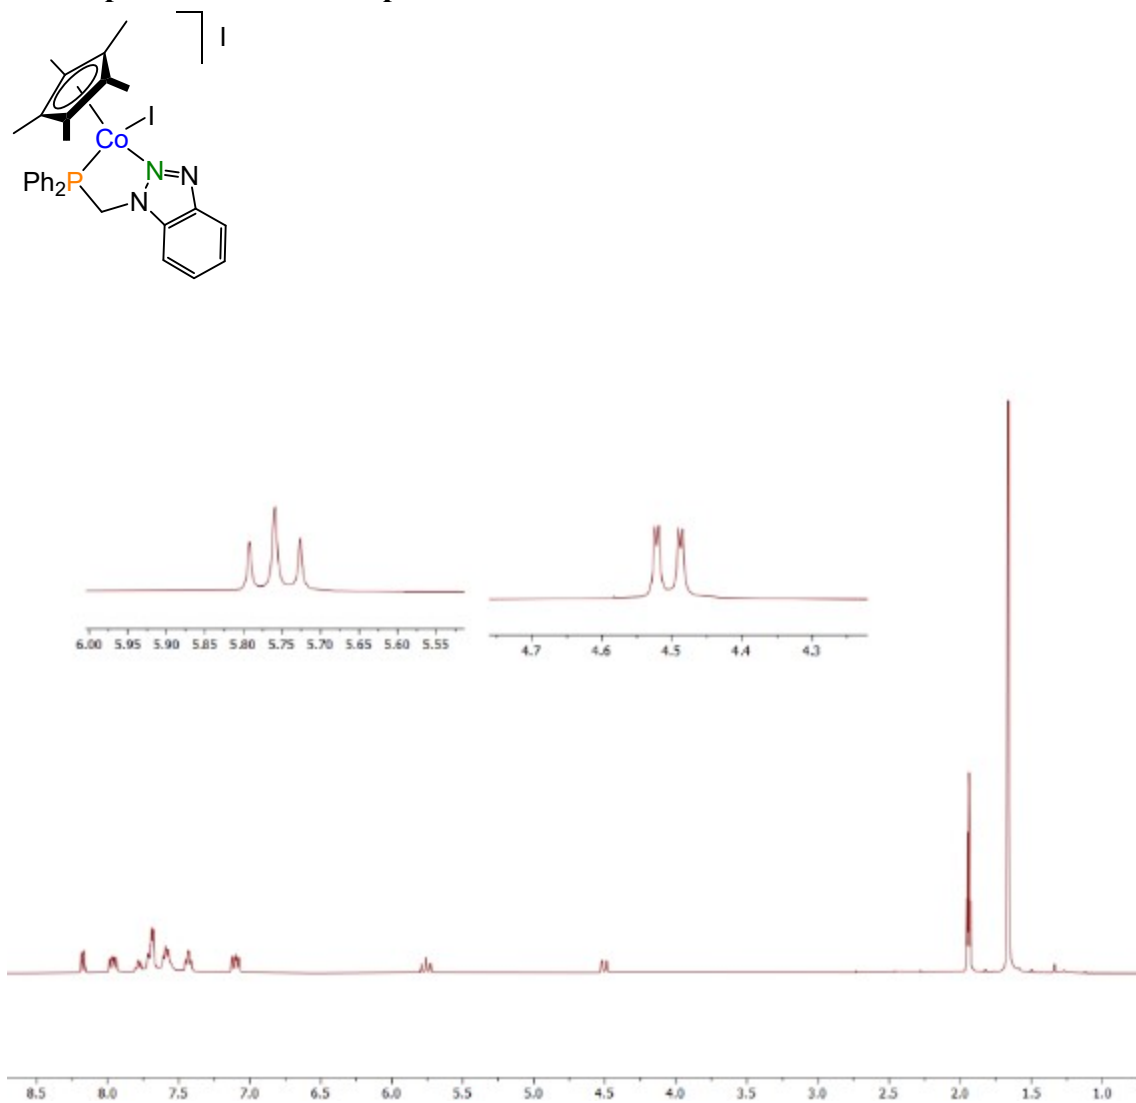

Figure S14.  $^1\text{H}$  NMR of 3 in  $\text{CD}_3\text{CN}$ .

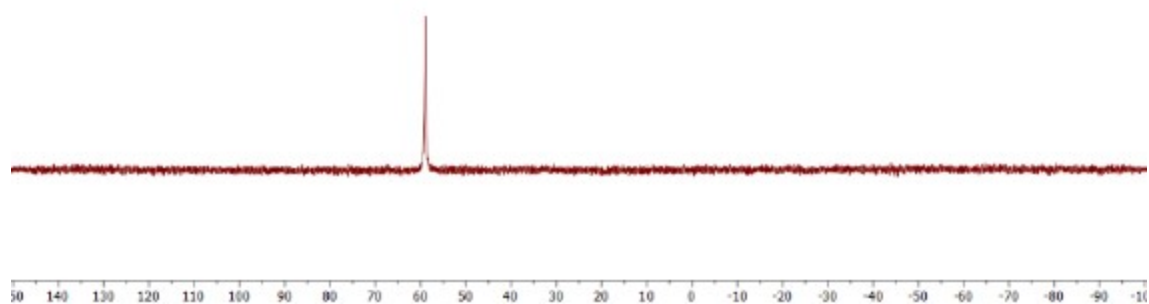

**Figure S15.**  $^{31}\text{P}\{^1\text{H}\}$  NMR of **3** in  $\text{CD}_3\text{CN}$ .

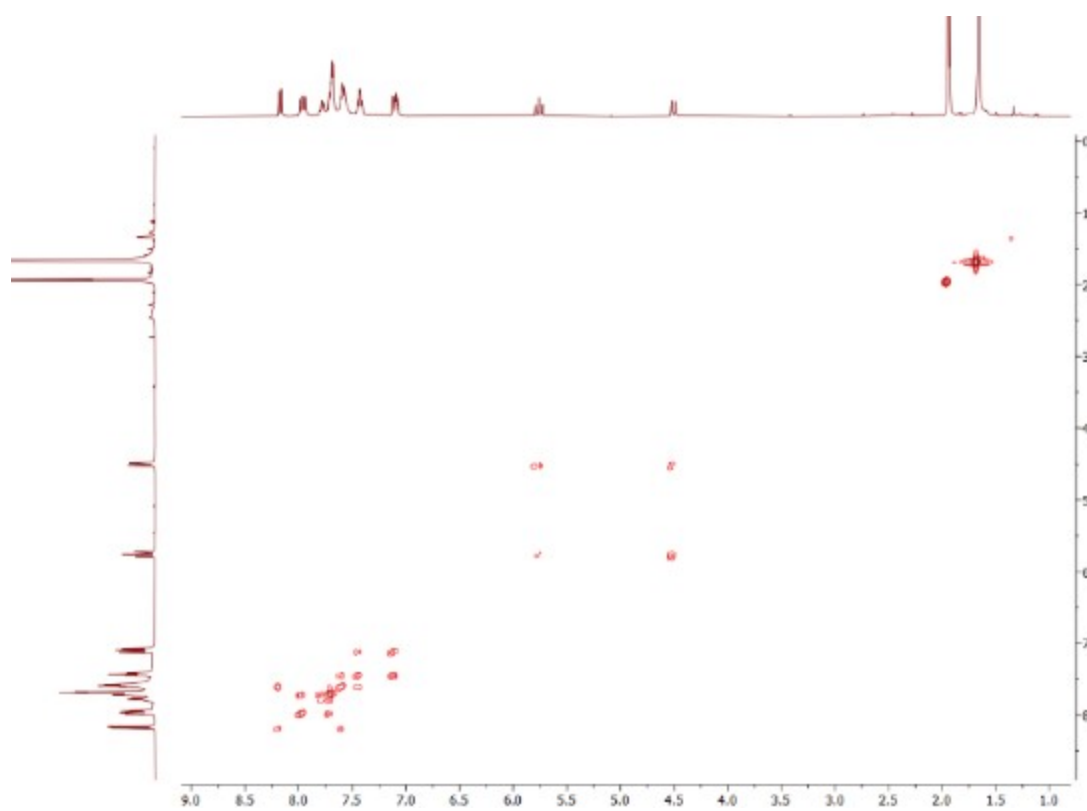

**Figure S16.**  $^1\text{H}$ - $^1\text{H}$  COSY of **3** in  $\text{CD}_3\text{CN}$ .

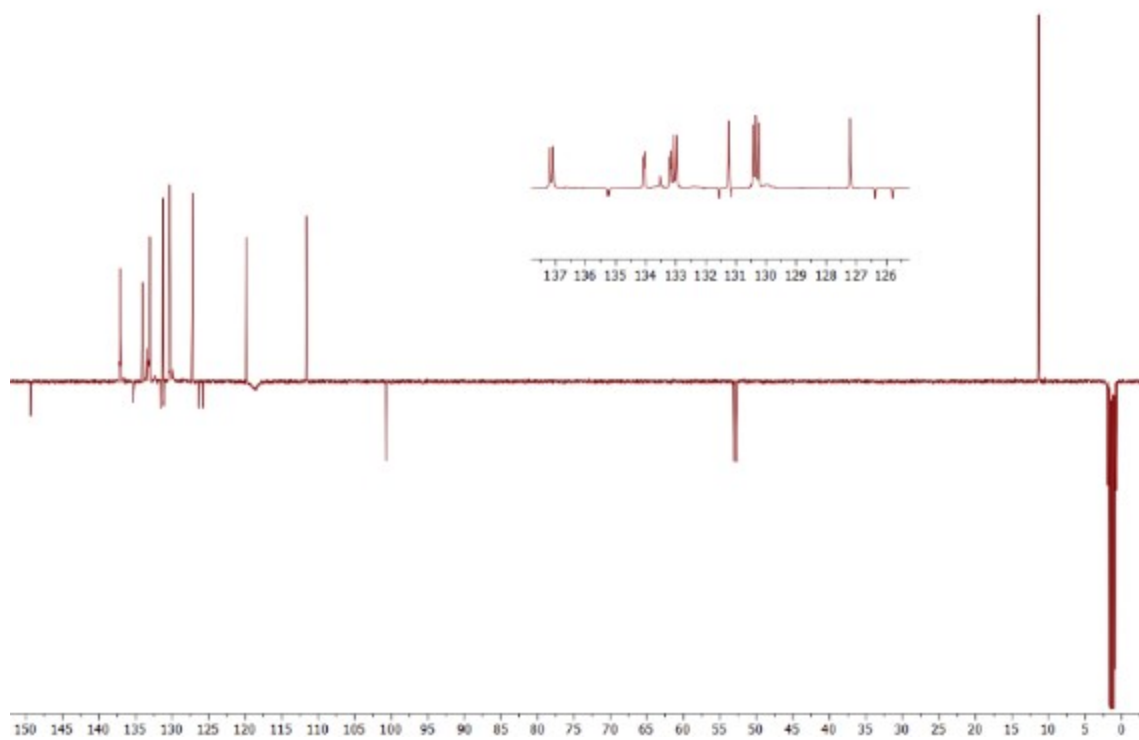

**Figure S17.** APT NMR of **3** in CD<sub>3</sub>CN.

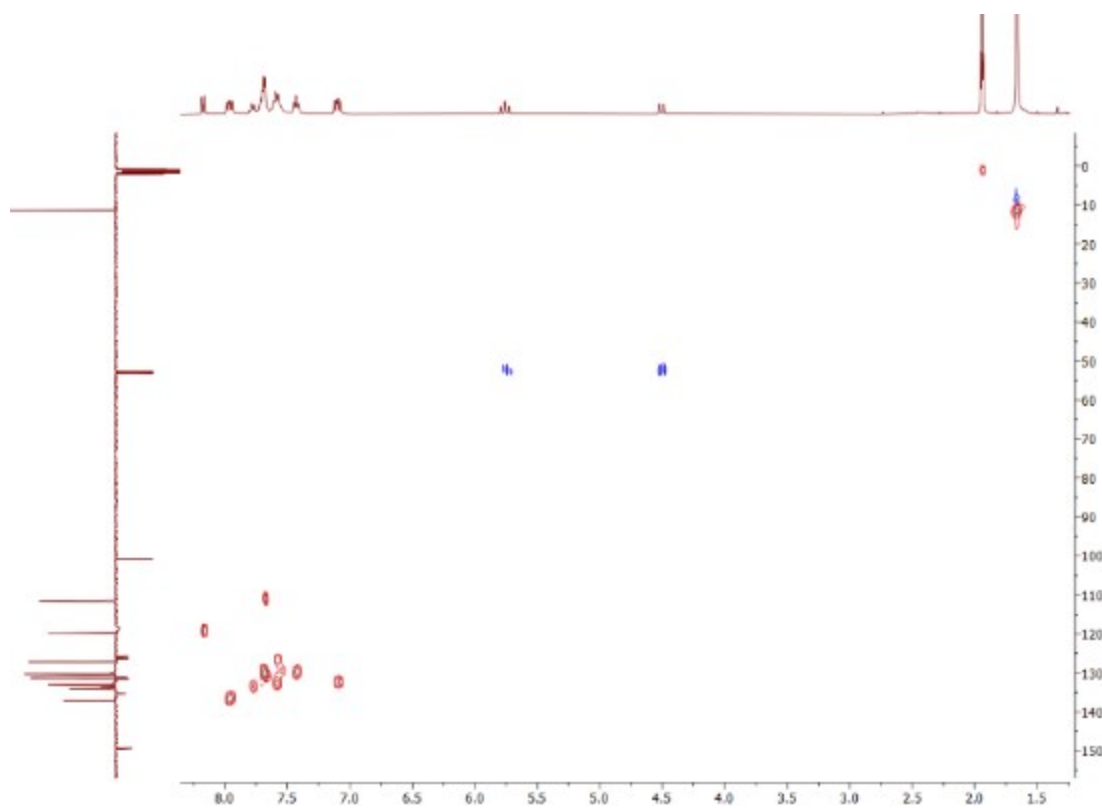

**Figure S18.** <sup>1</sup>H-<sup>13</sup>C HSQC of **3** in CD<sub>3</sub>CN.

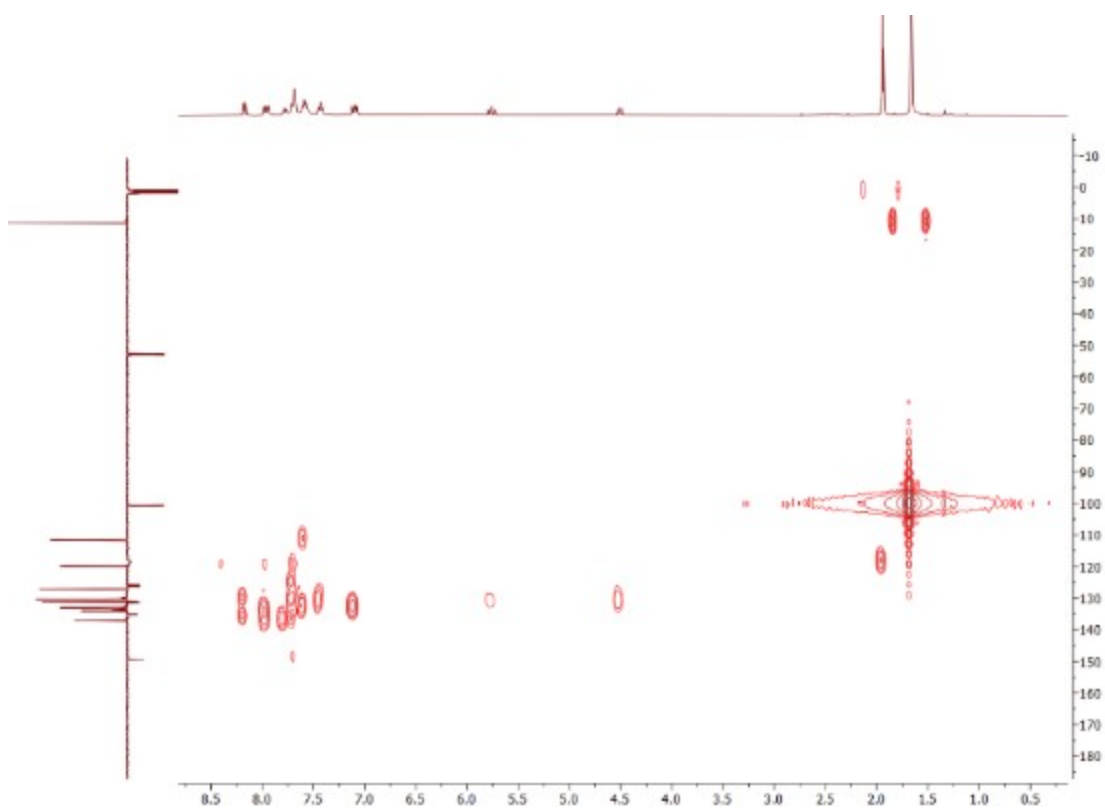

**Figure S19.**  $^1\text{H}$ - $^{13}\text{C}$  HMBC of **3** in  $\text{CD}_3\text{CN}$ .

## 2. $^{19}\text{F}$ NMR Spectra of the fluorination reactions

Table 1

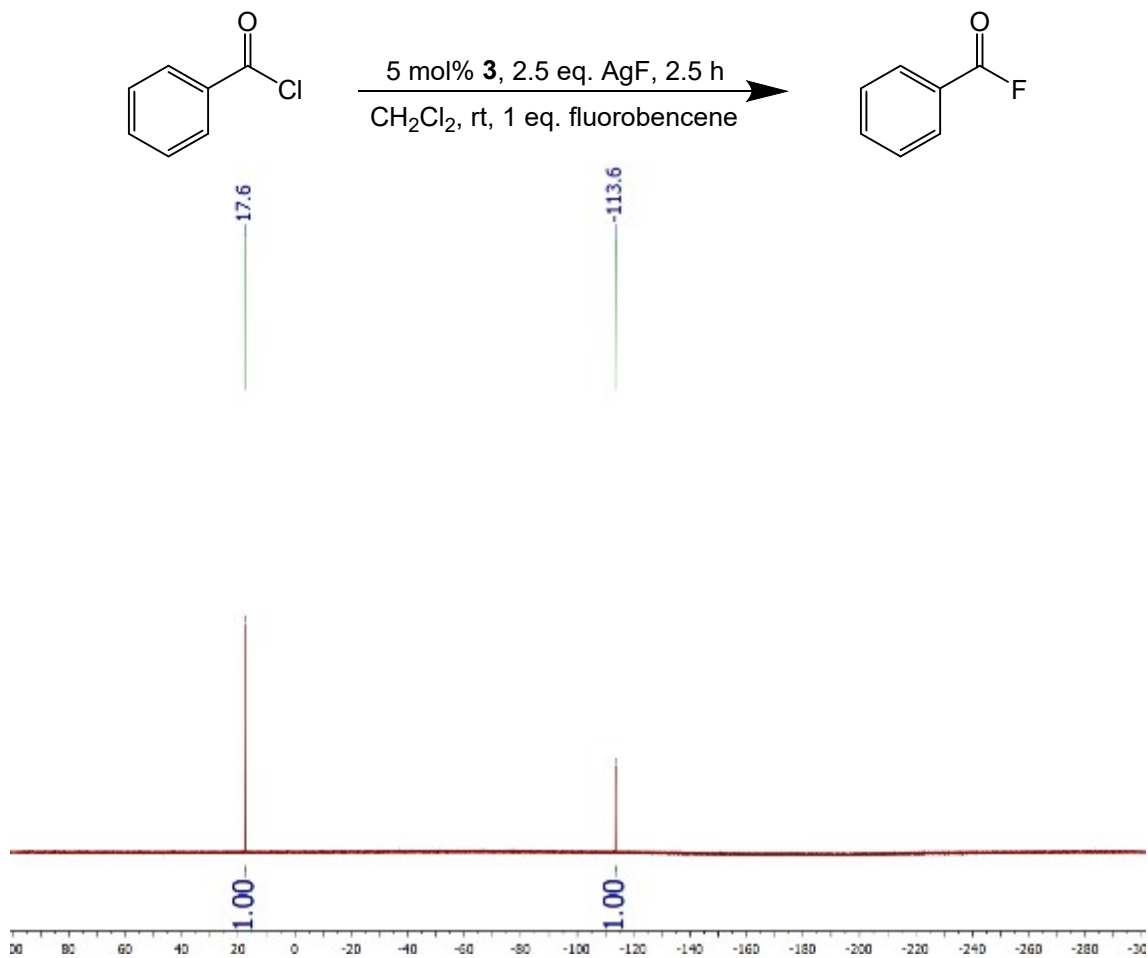

Figure S20. Crude  $^{19}\text{F}$  NMR in  $\text{CDCl}_3$ .

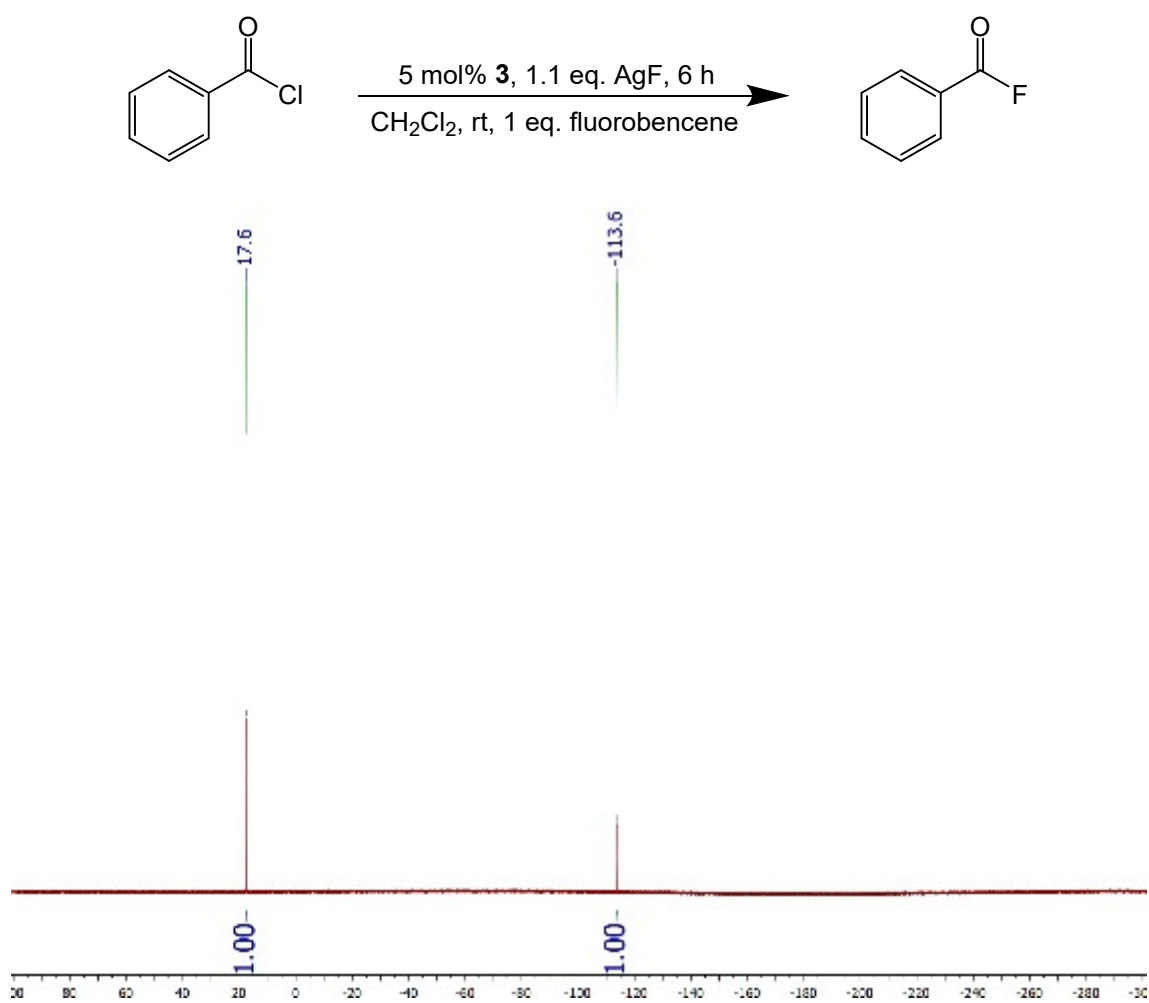

**Figure S21.** Crude  $^{19}\text{F}$  NMR in  $\text{CDCl}_3$ .

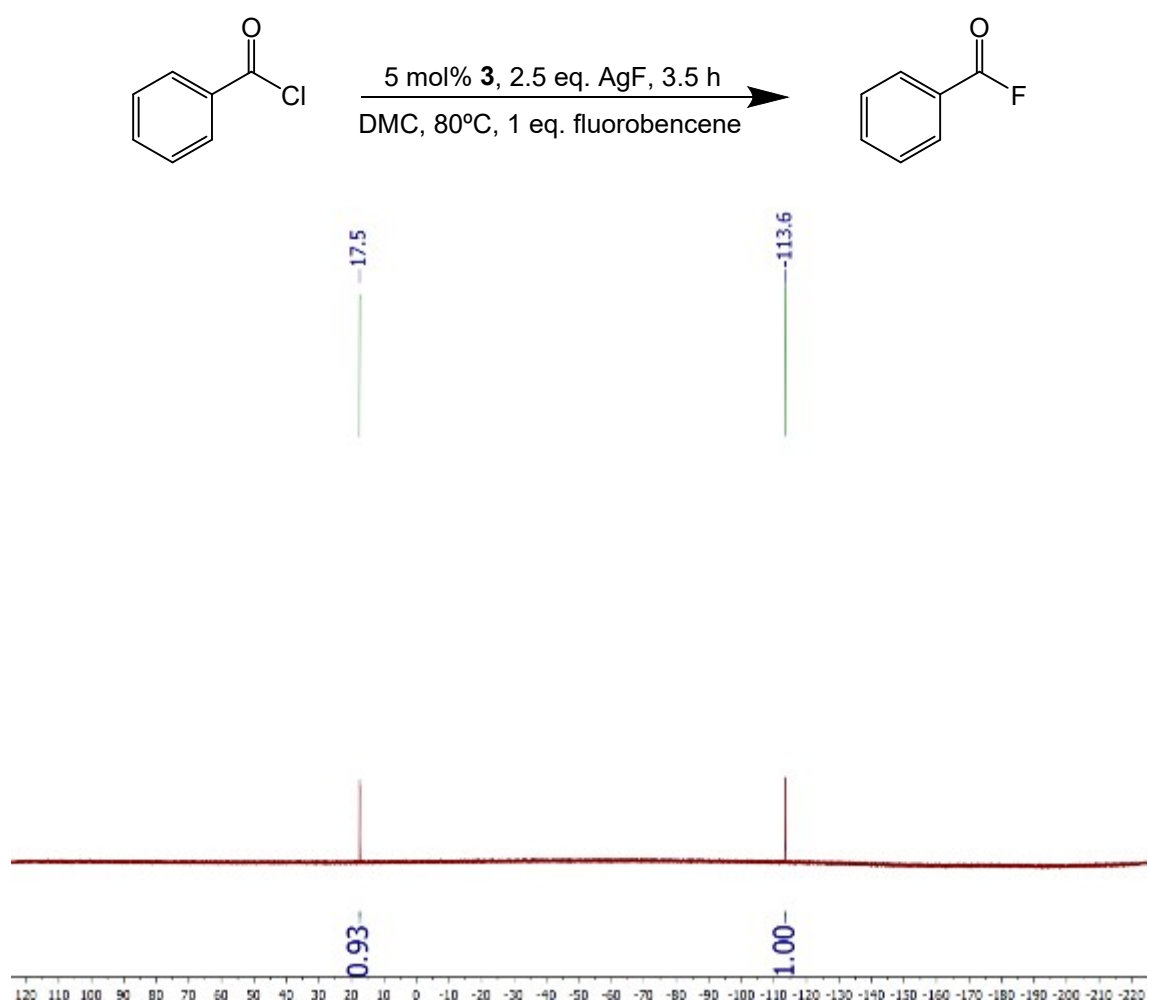

**Figure S22.** Crude  $^{19}\text{F}$  NMR in  $\text{CDCl}_3$ .



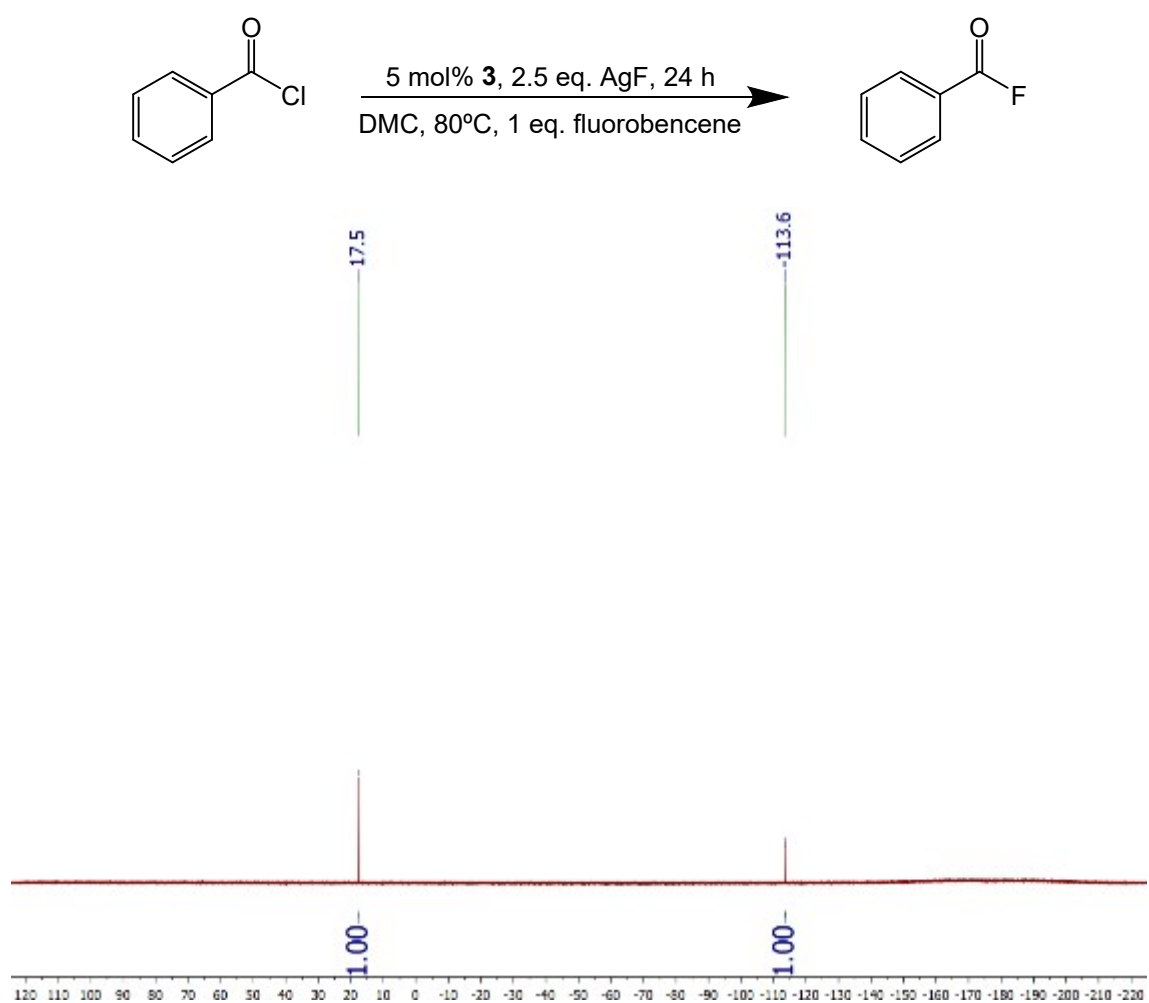

**Figure S23.** Crude  $^{19}\text{F}$  NMR in  $\text{CDCl}_3$ .

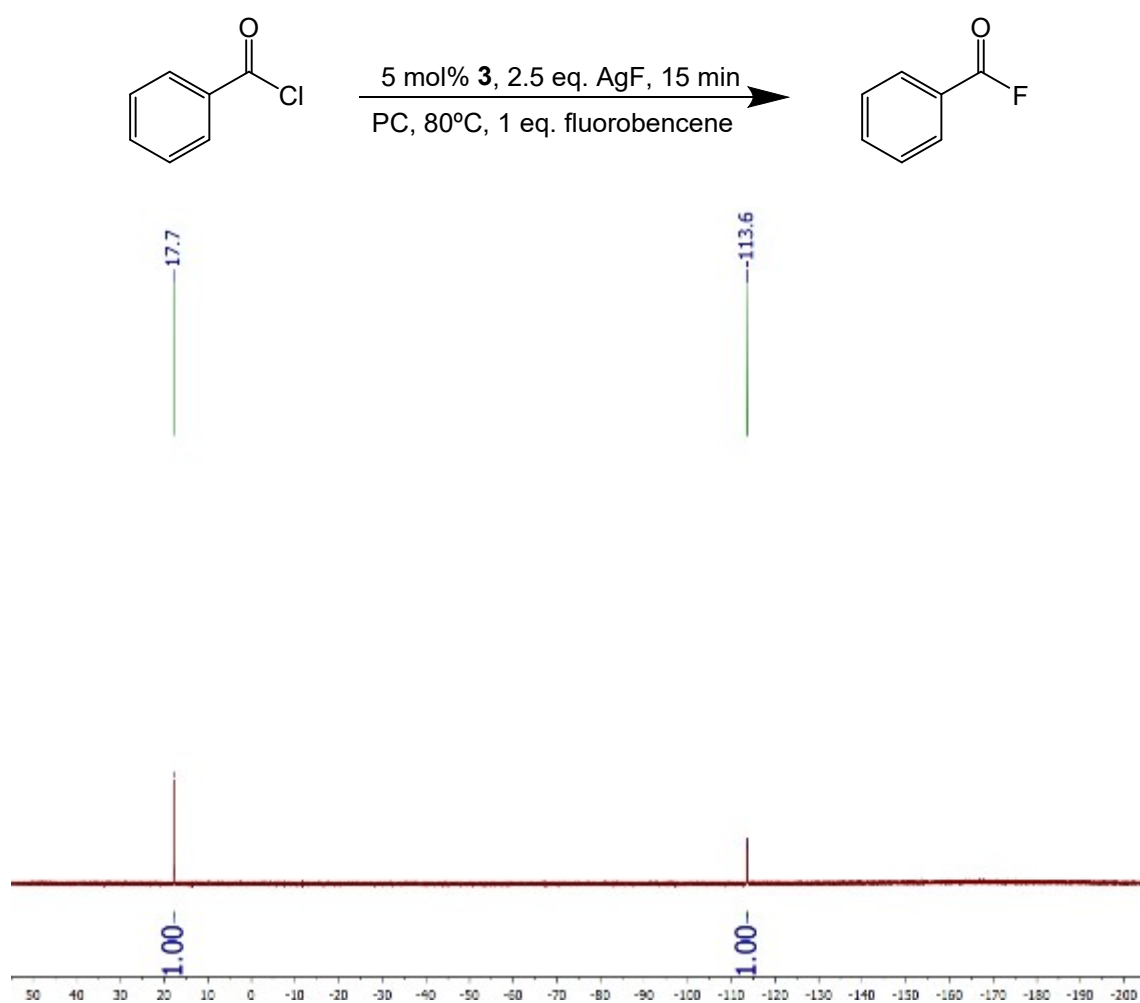

**Figure S24.** Crude  $^{19}\text{F}$  NMR in  $\text{CDCl}_3$ .

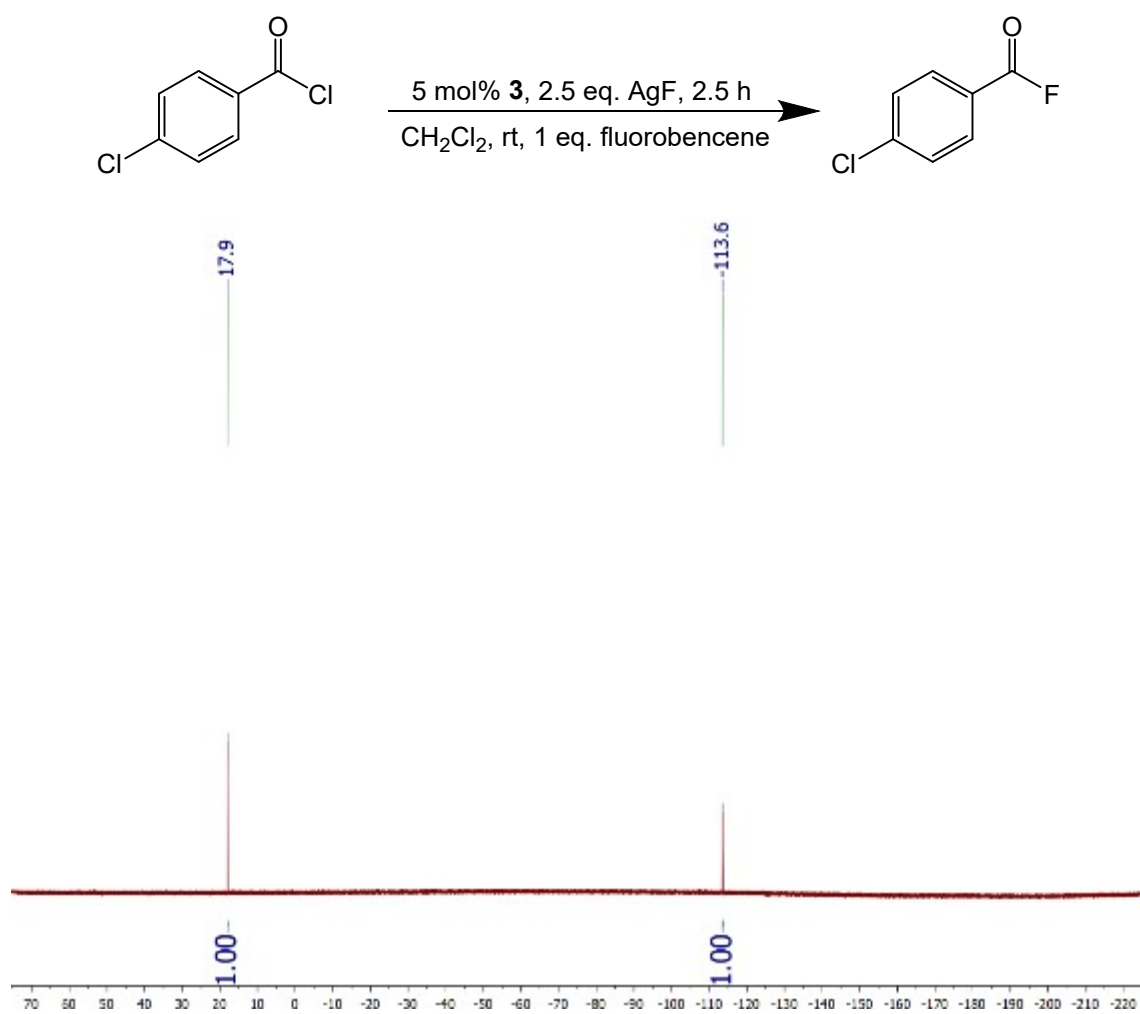

**Figure S25.** Crude  $^{19}\text{F}$  NMR in  $\text{CDCl}_3$ .

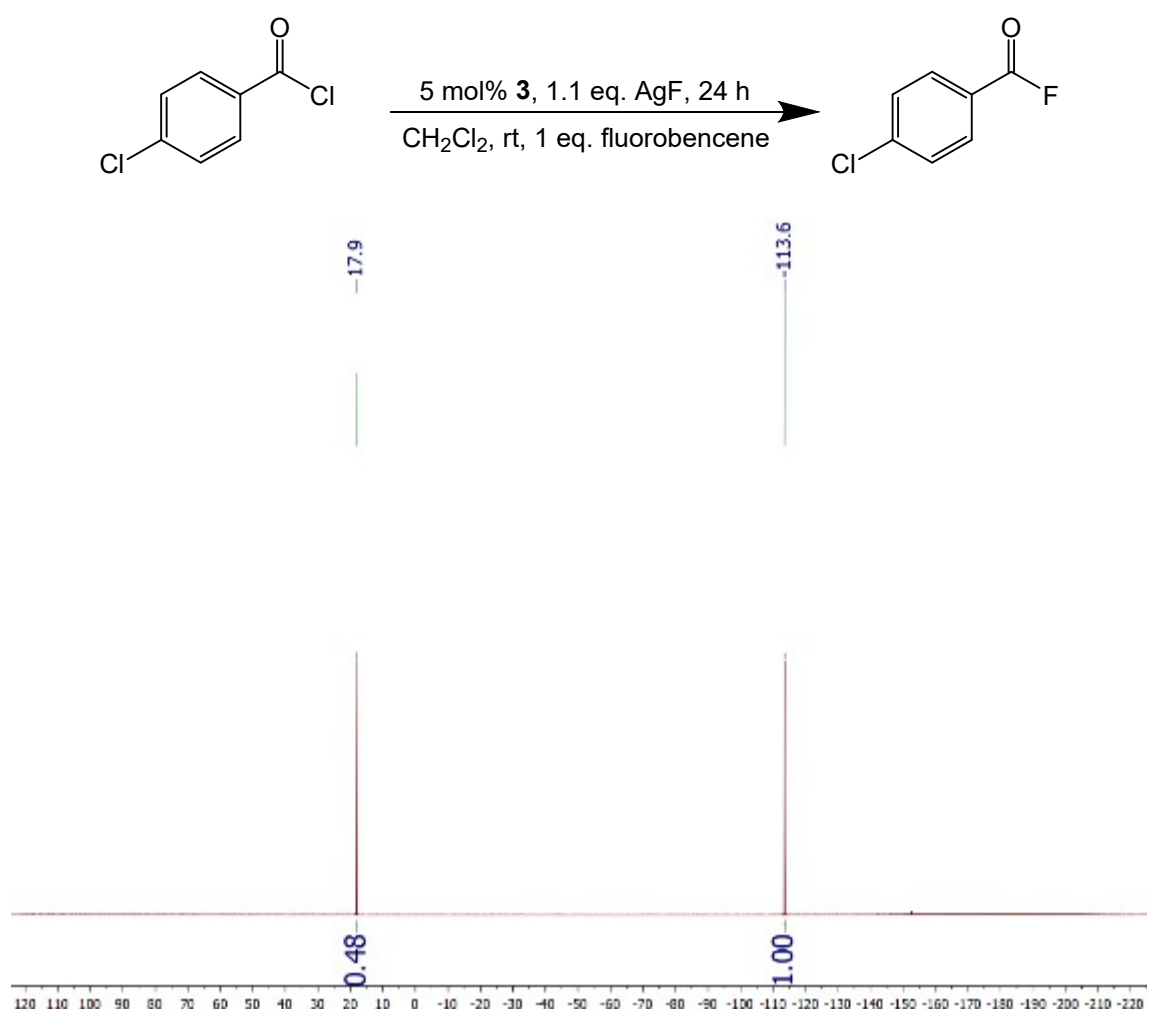

**Figure S26.** Crude  $^{19}\text{F}$  NMR in  $\text{CDCl}_3$ .

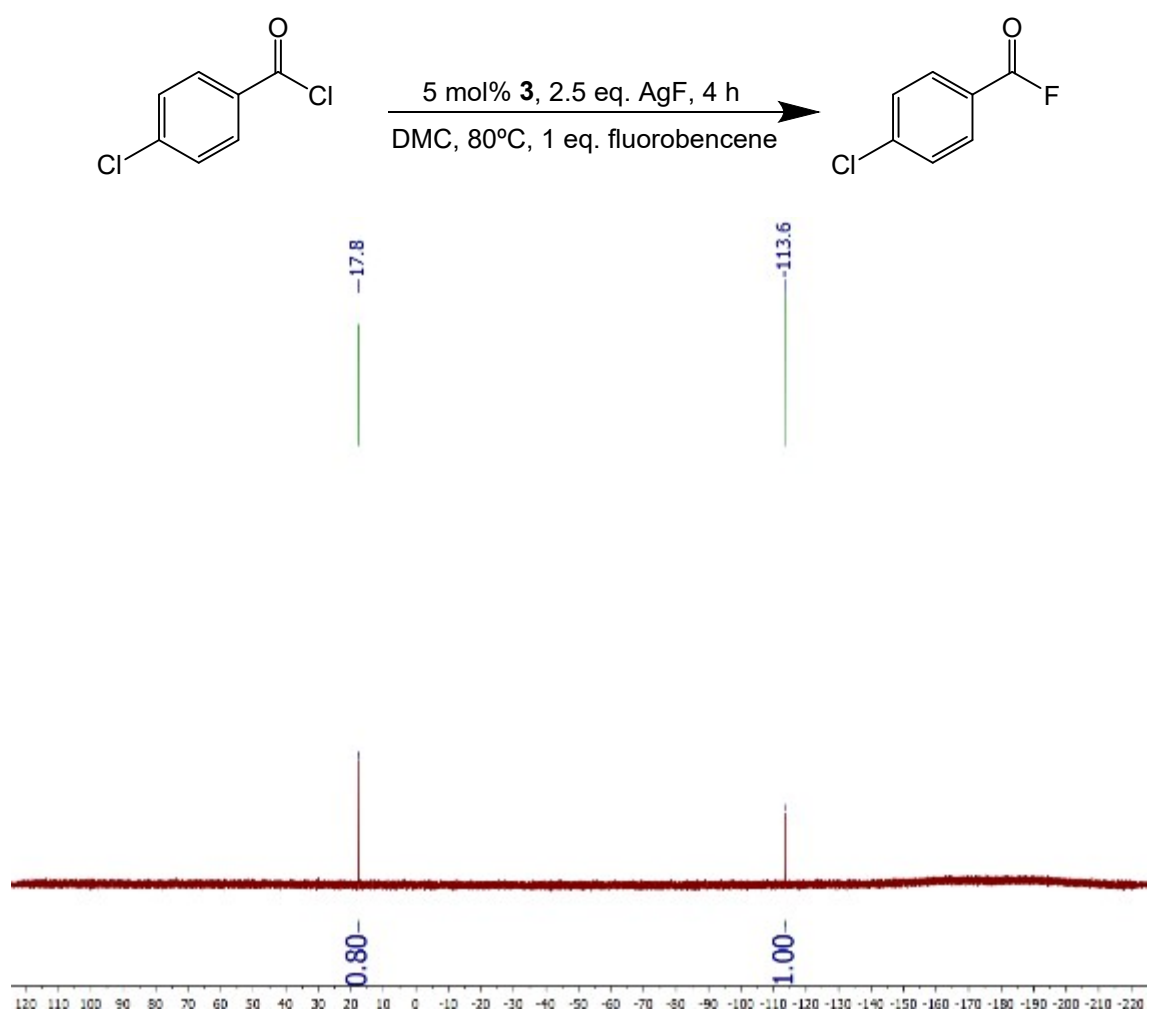

**Figure S27.** Crude  $^{19}\text{F}$  NMR in  $\text{CDCl}_3$ .

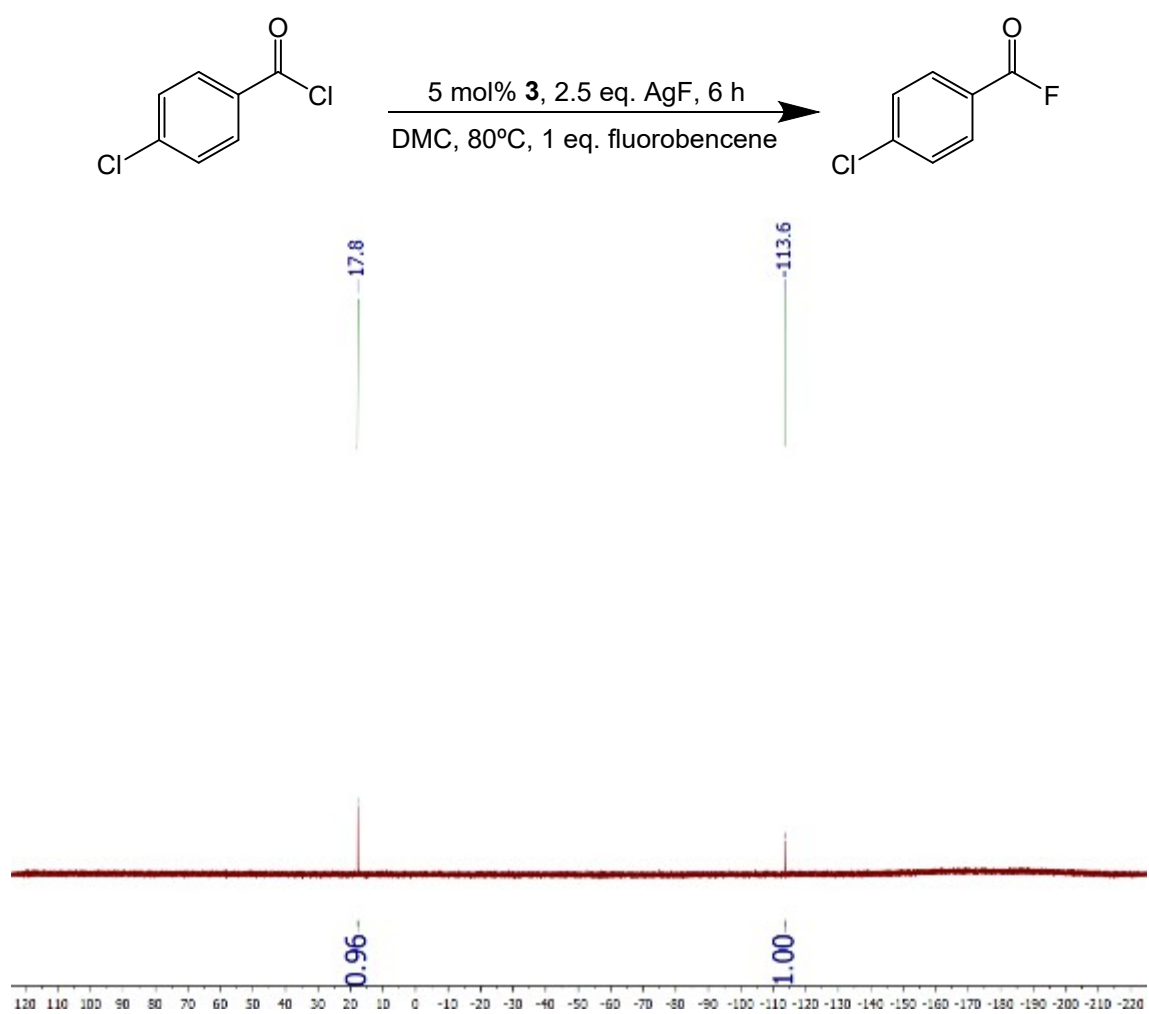

**Figure S28.** Crude  $^{19}\text{F}$  NMR in  $\text{CDCl}_3$ .

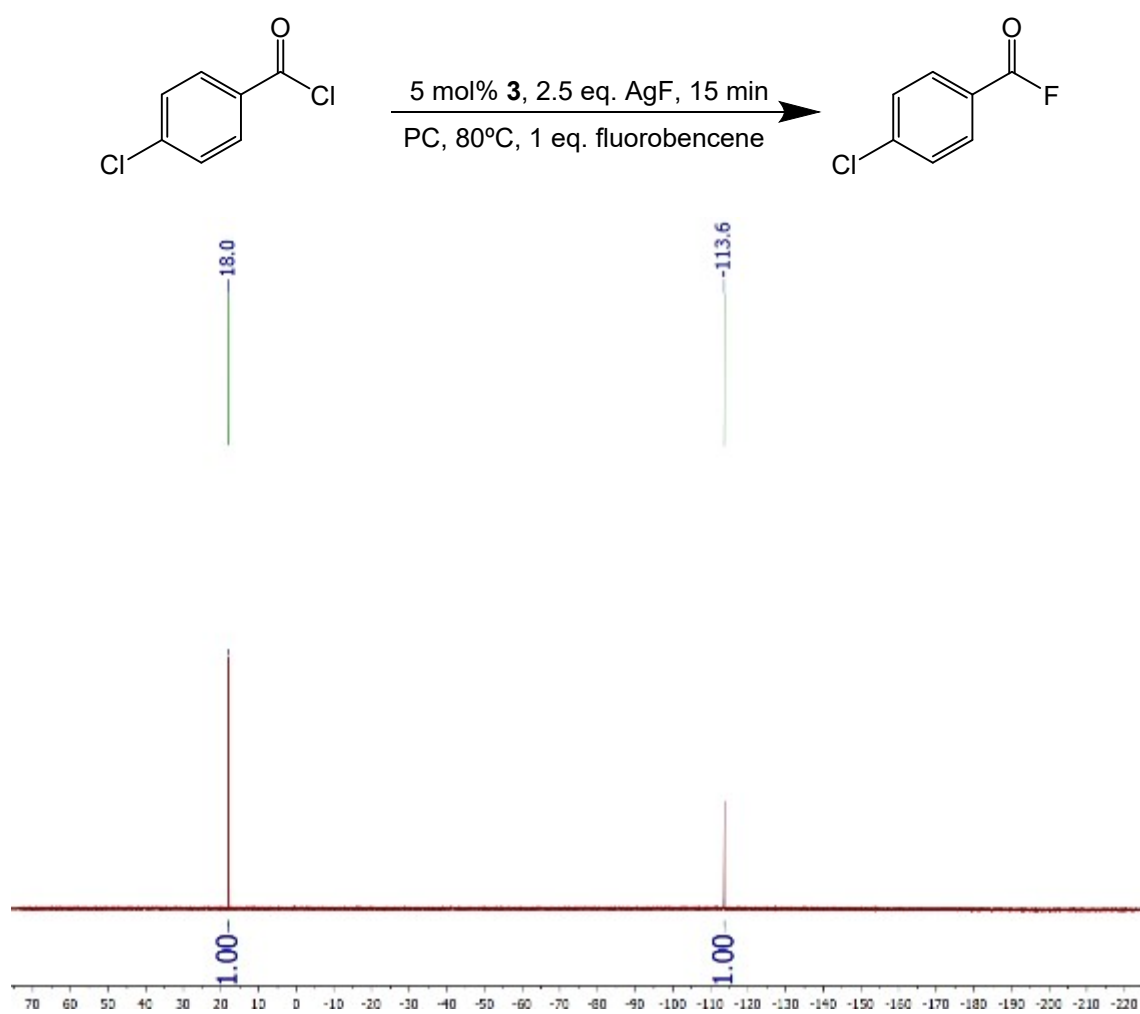

**Figure S29.** Crude  $^{19}\text{F}$  NMR in  $\text{CDCl}_3$ .

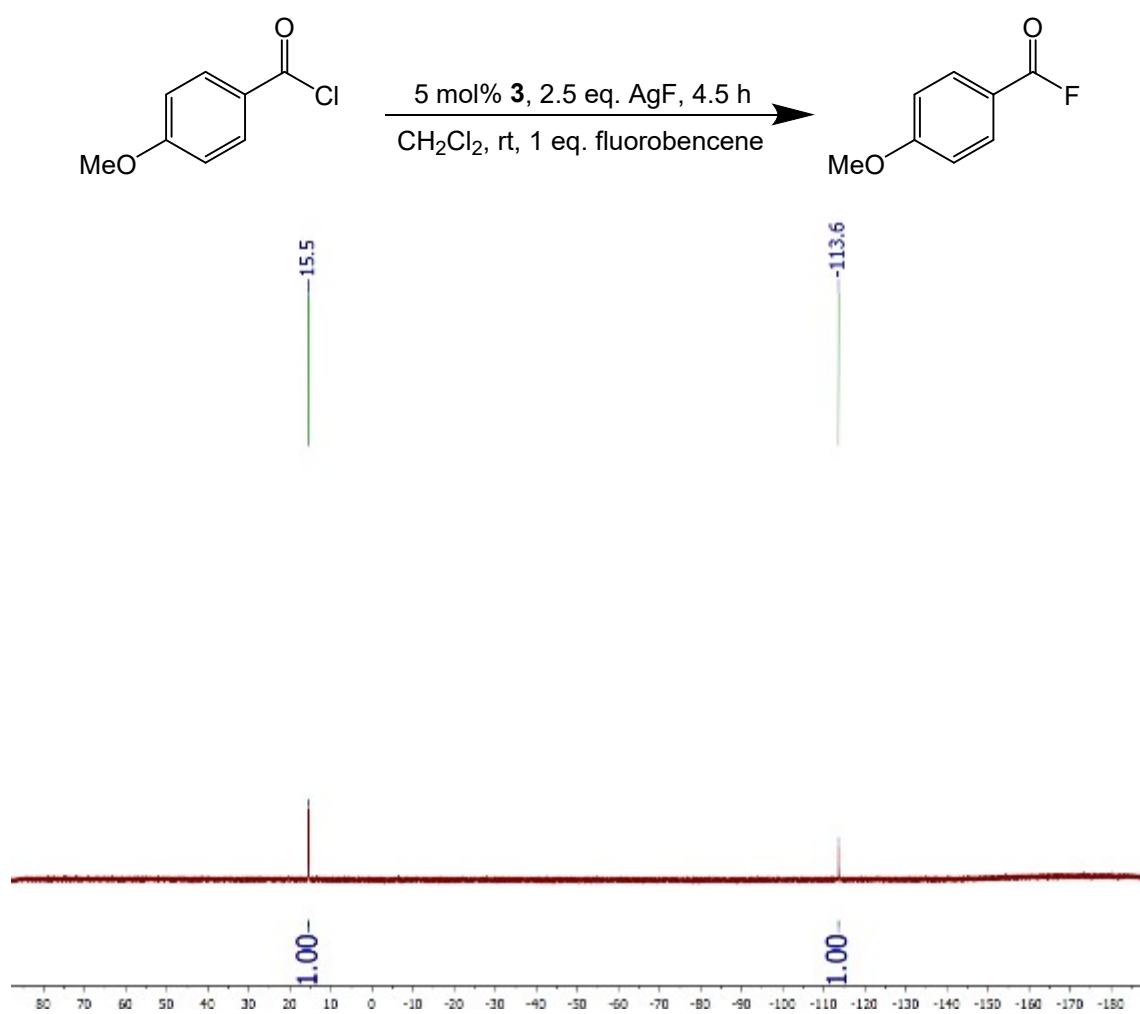

**Figure S30.** Crude <sup>19</sup>F NMR in CDCl<sub>3</sub>.



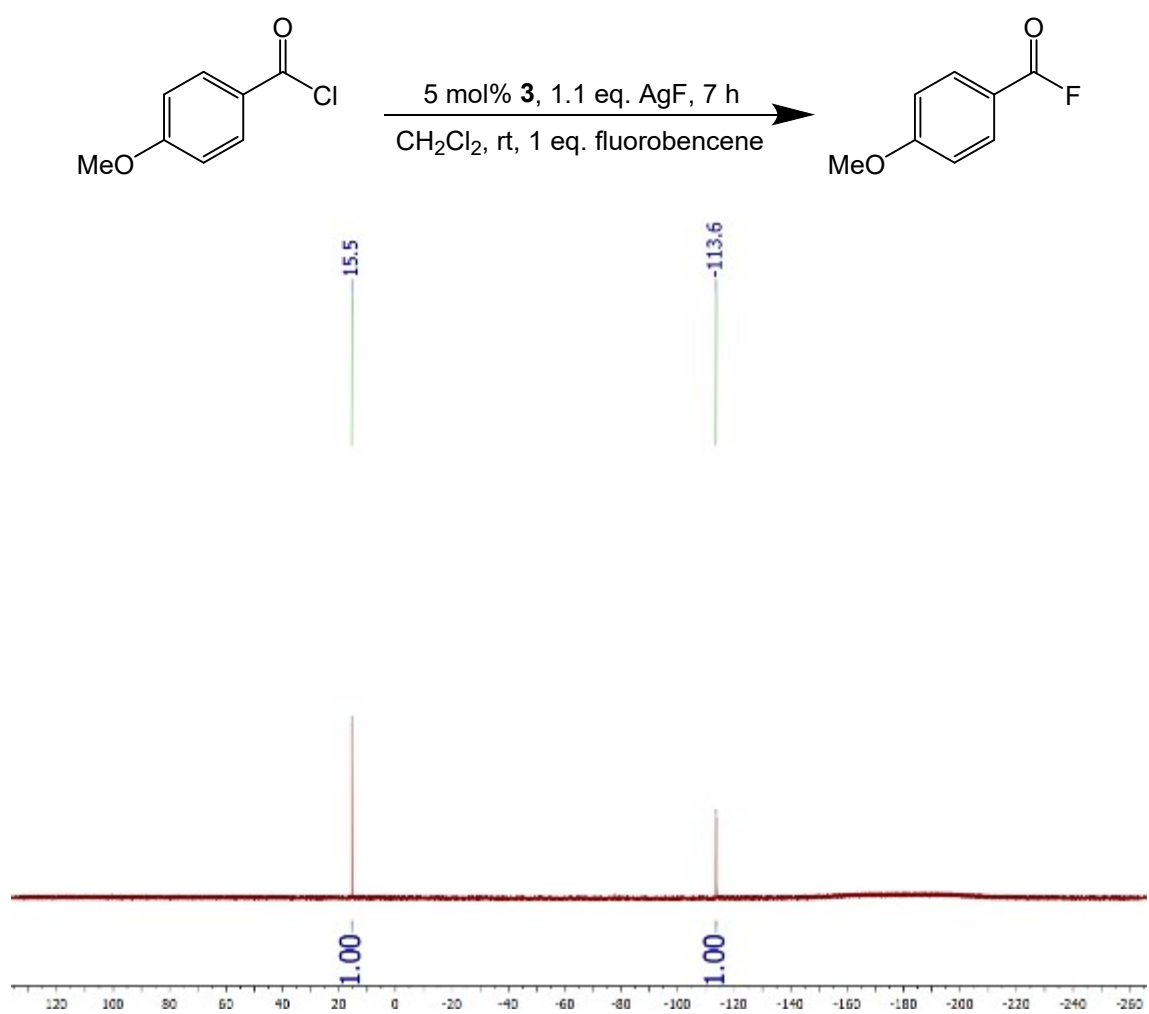

**Figure S31.** Crude  $^{19}\text{F}$  NMR in  $\text{CDCl}_3$ .

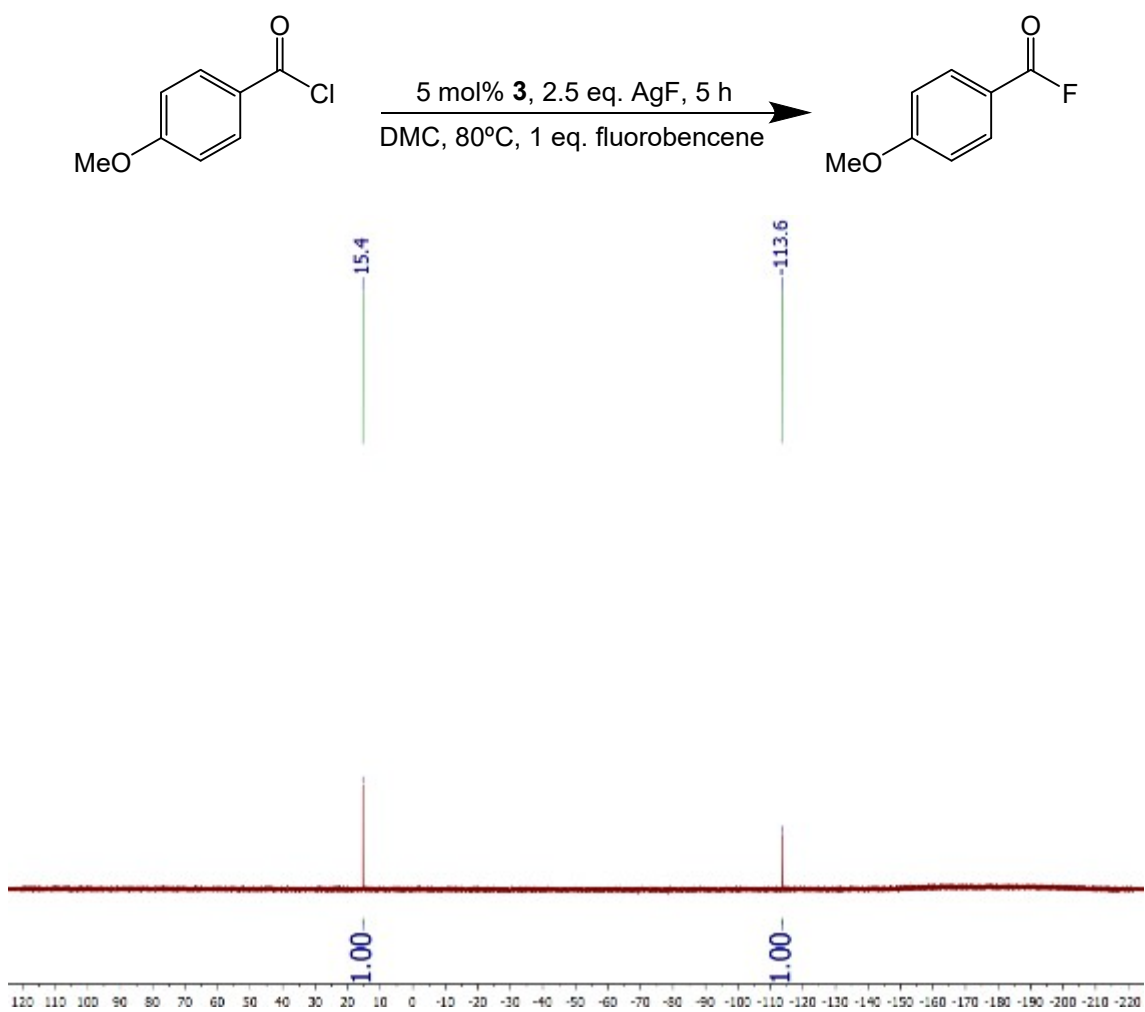

**Figure S32.** Crude  $^{19}\text{F}$  NMR in  $\text{CDCl}_3$ .

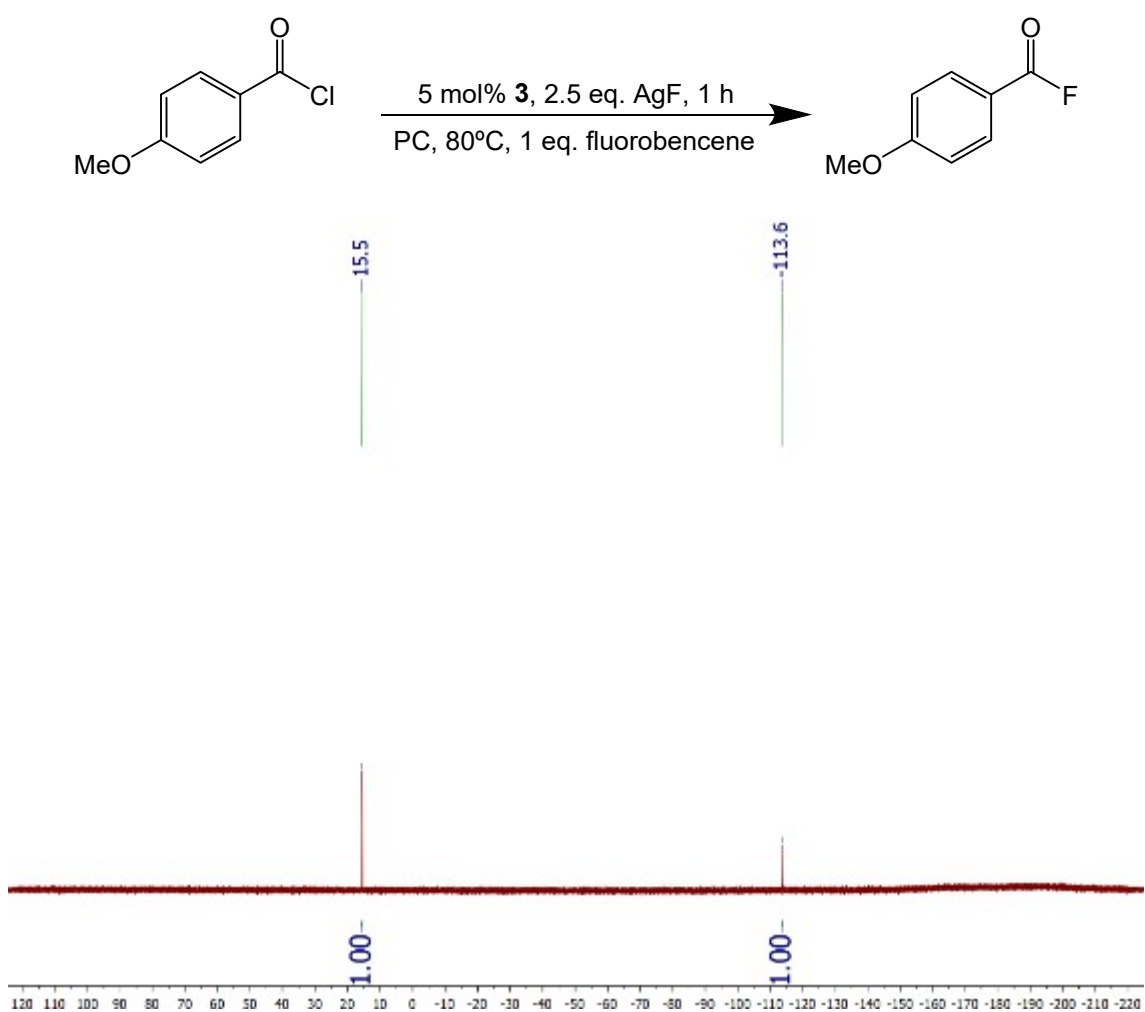

**Figure S33.** Crude  $^{19}\text{F}$  NMR in  $\text{CDCl}_3$ .

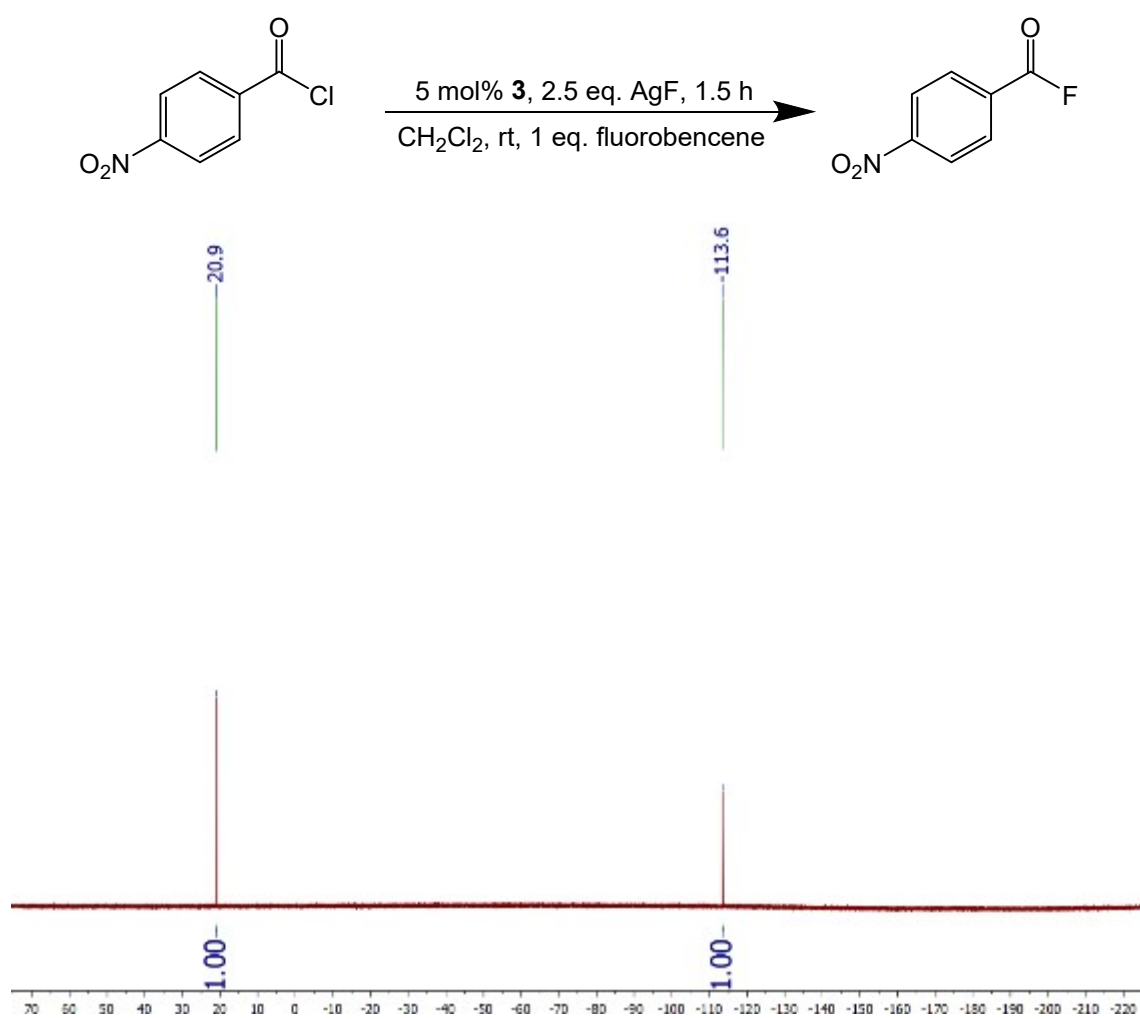

**Figure S34.** Crude  $^{19}\text{F}$  NMR in  $\text{CDCl}_3$ .

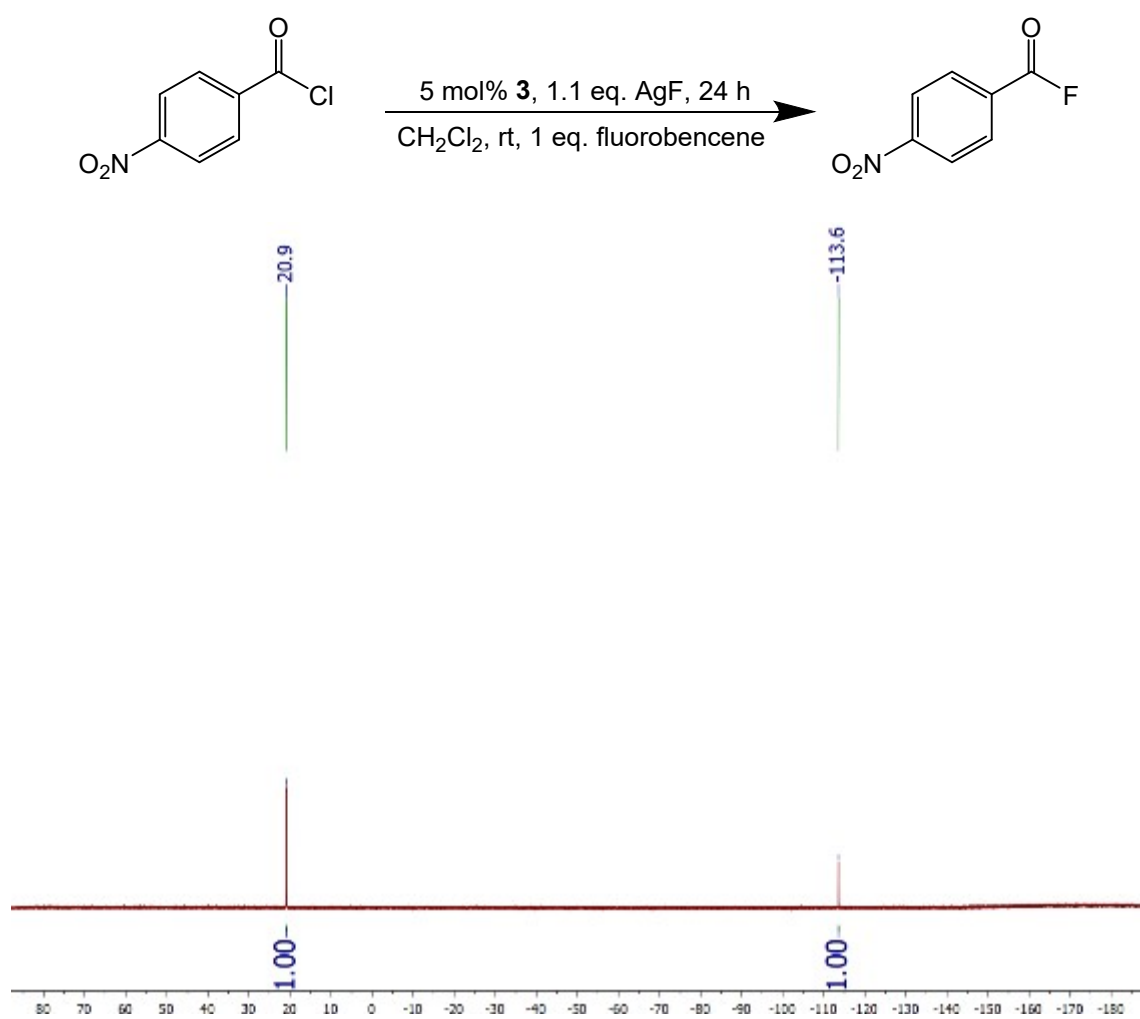

**Figure S35.** Crude  $^{19}\text{F}$  NMR in  $\text{CDCl}_3$ .

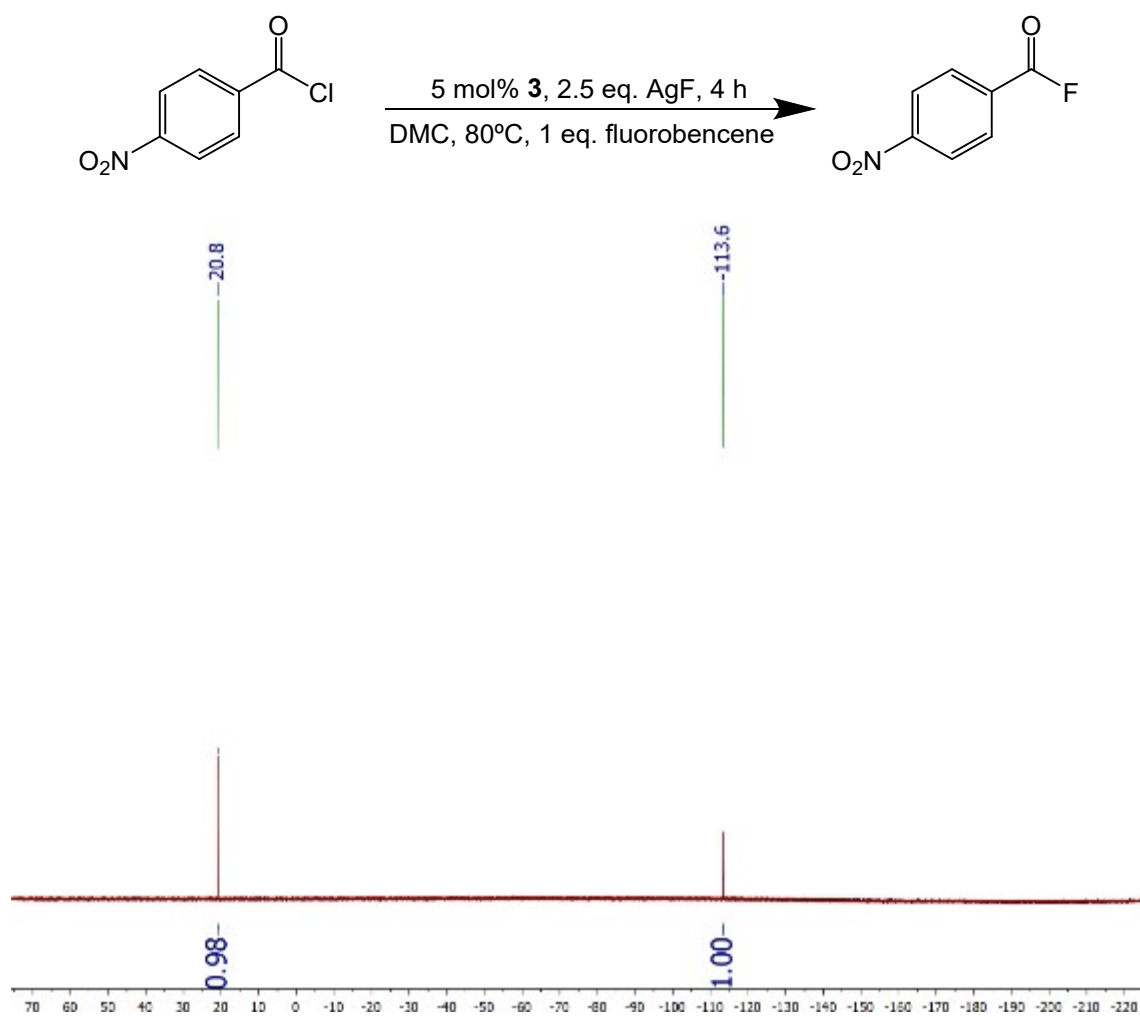

**Figure S36.** Crude  $^{19}\text{F}$  NMR in  $\text{CDCl}_3$ .

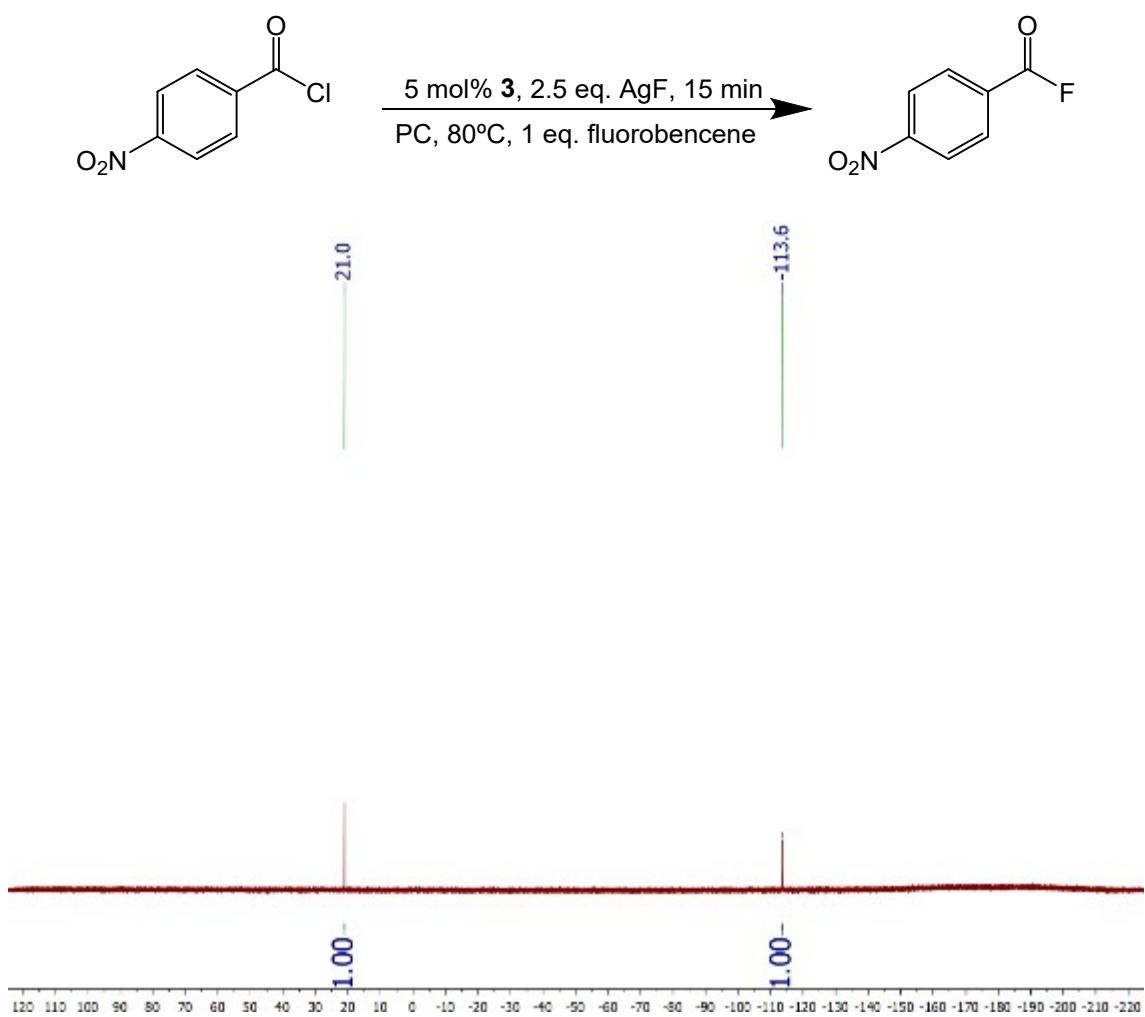

**Figure S37.** Crude  $^{19}\text{F}$  NMR in  $\text{CDCl}_3$ .

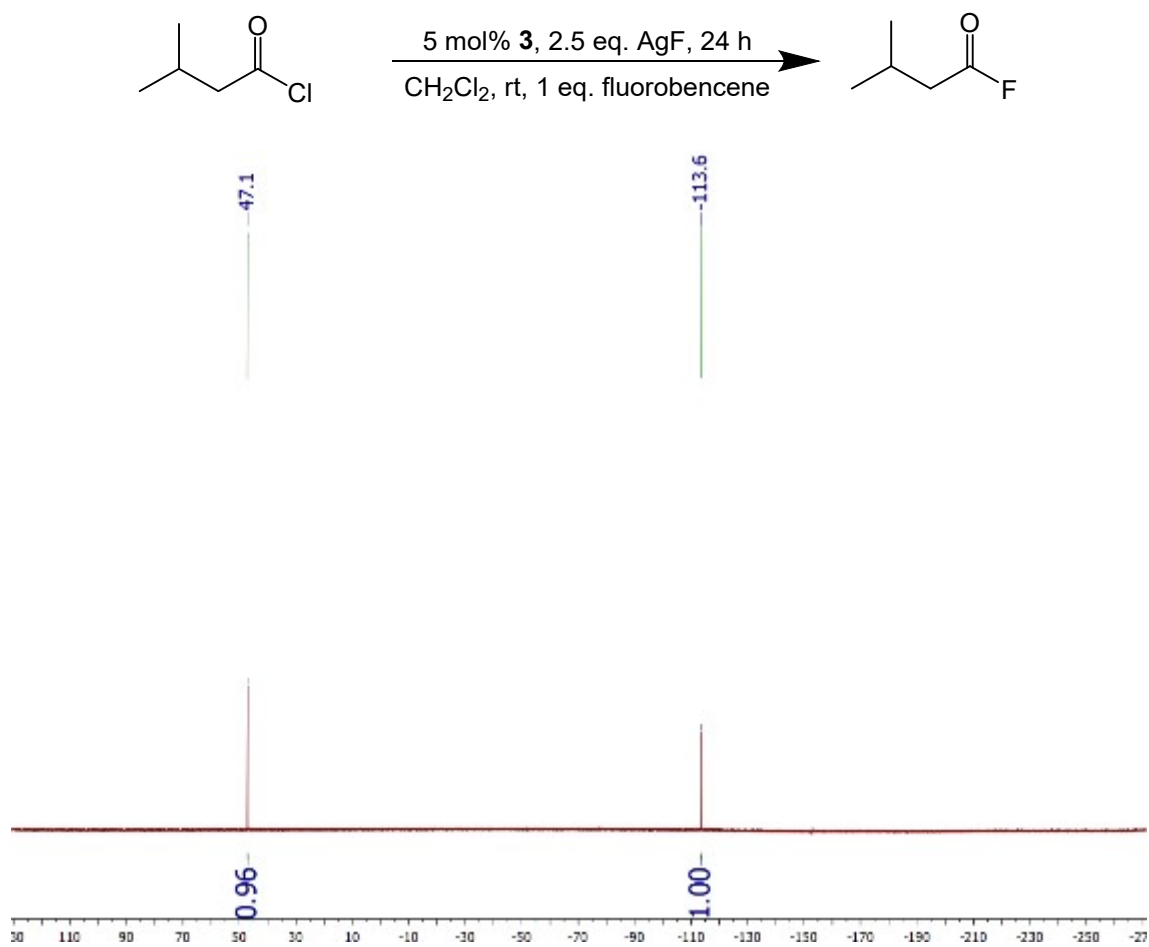

**Figure S38.** Crude  $^{19}\text{F}$  NMR in  $\text{CDCl}_3$ .



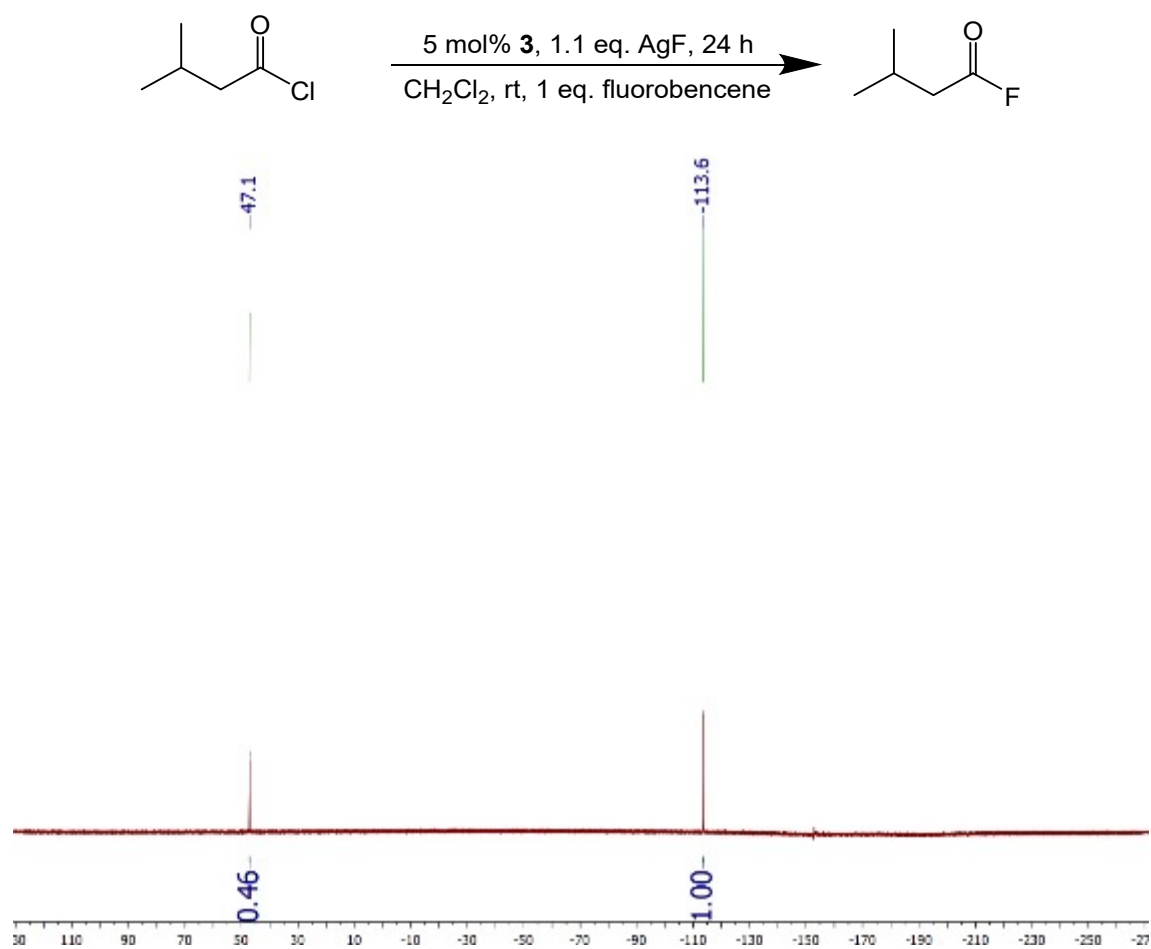

**Figure S39.** Crude  $^{19}\text{F}$  NMR in  $\text{CDCl}_3$ .

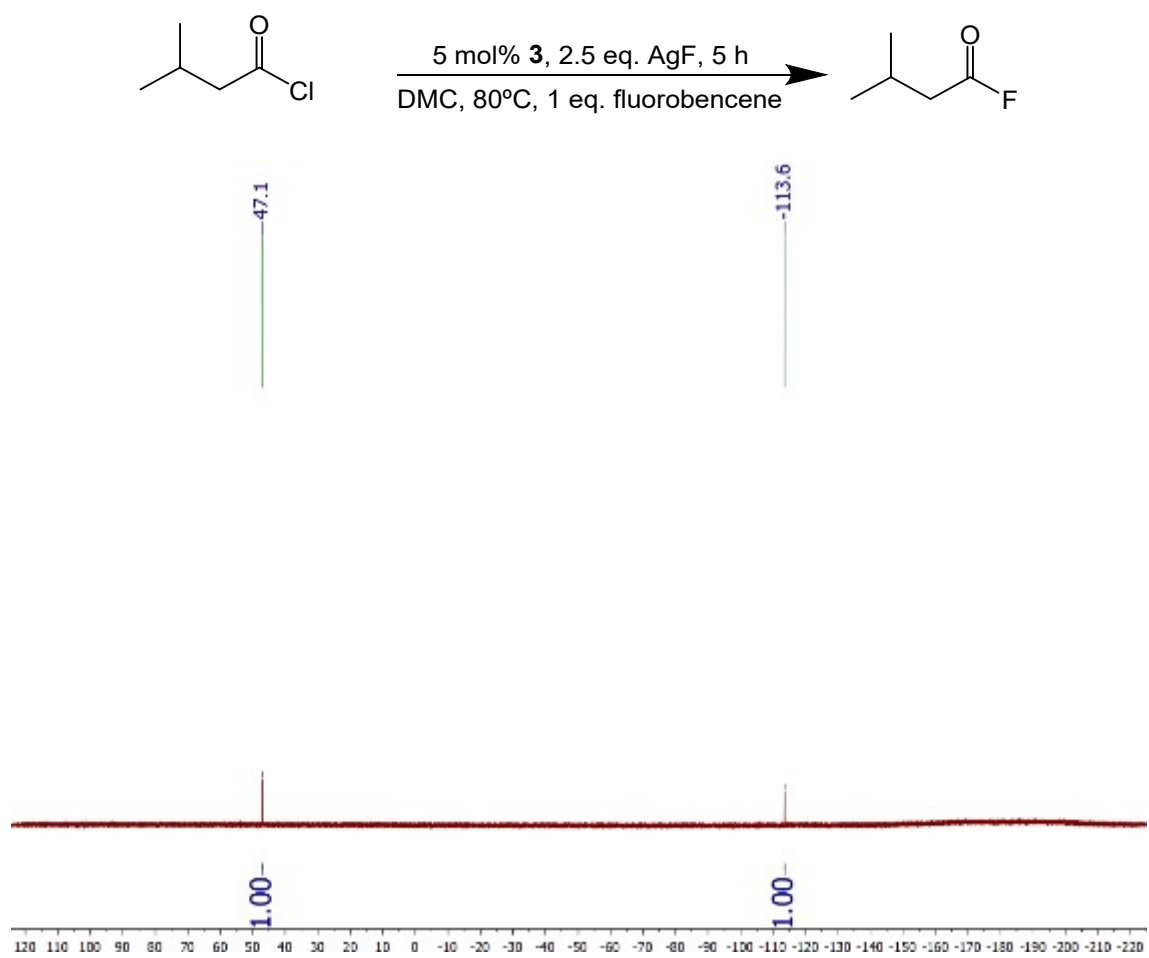

**Figure S40.** Crude  $^{19}\text{F}$  NMR in  $\text{CDCl}_3$ .

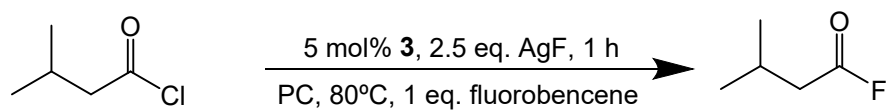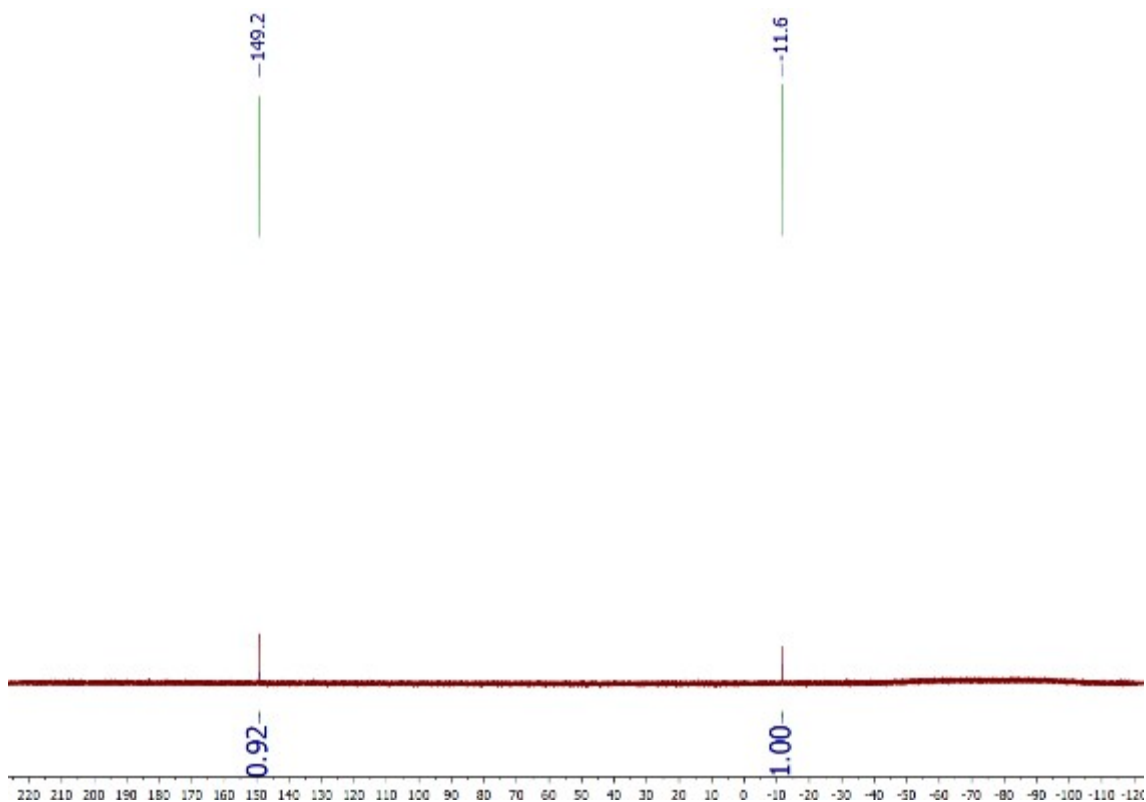

**Figure S41.** Crude  $^{19}\text{F}$  NMR in  $\text{CDCl}_3$ .

**Table 2**

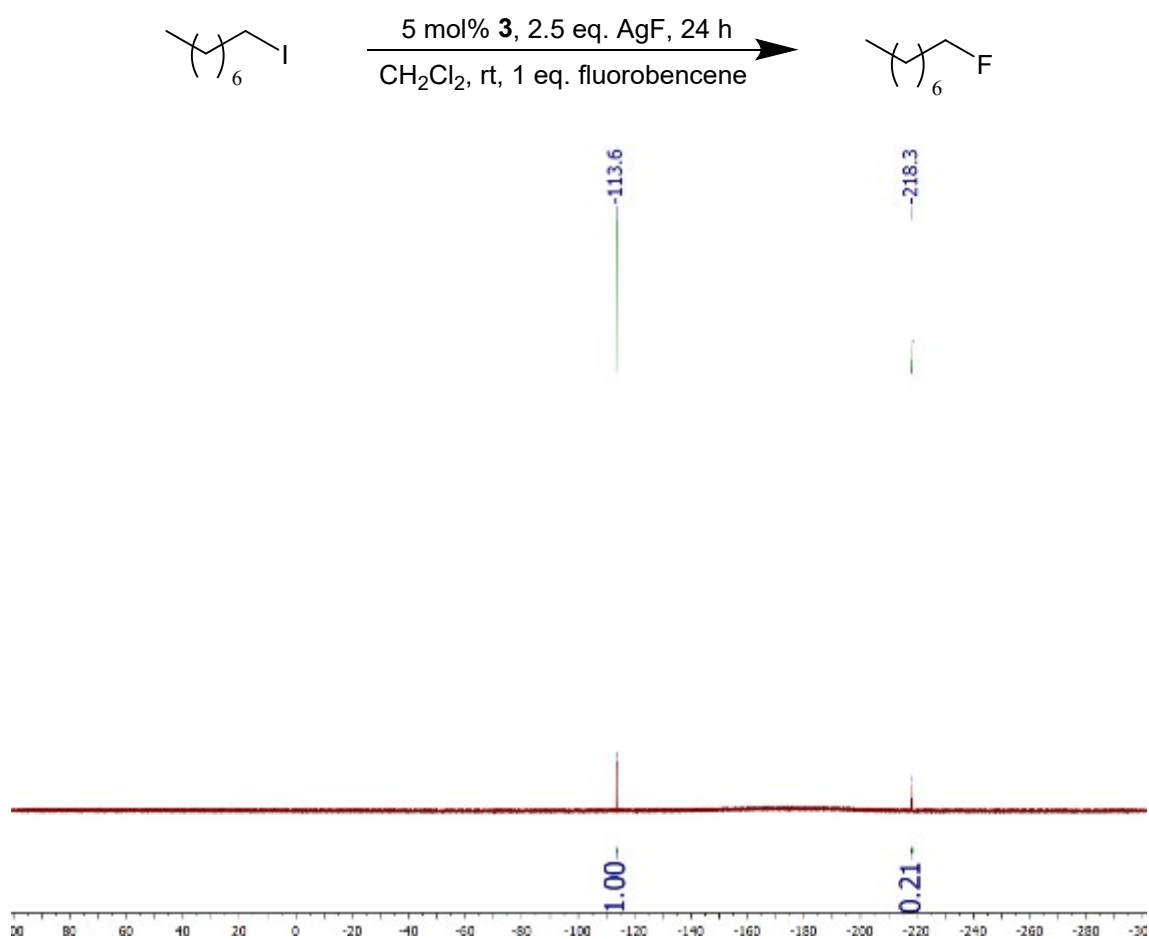

**Figure S42.** Crude  $^{19}\text{F}$  NMR in  $\text{CDCl}_3$ .

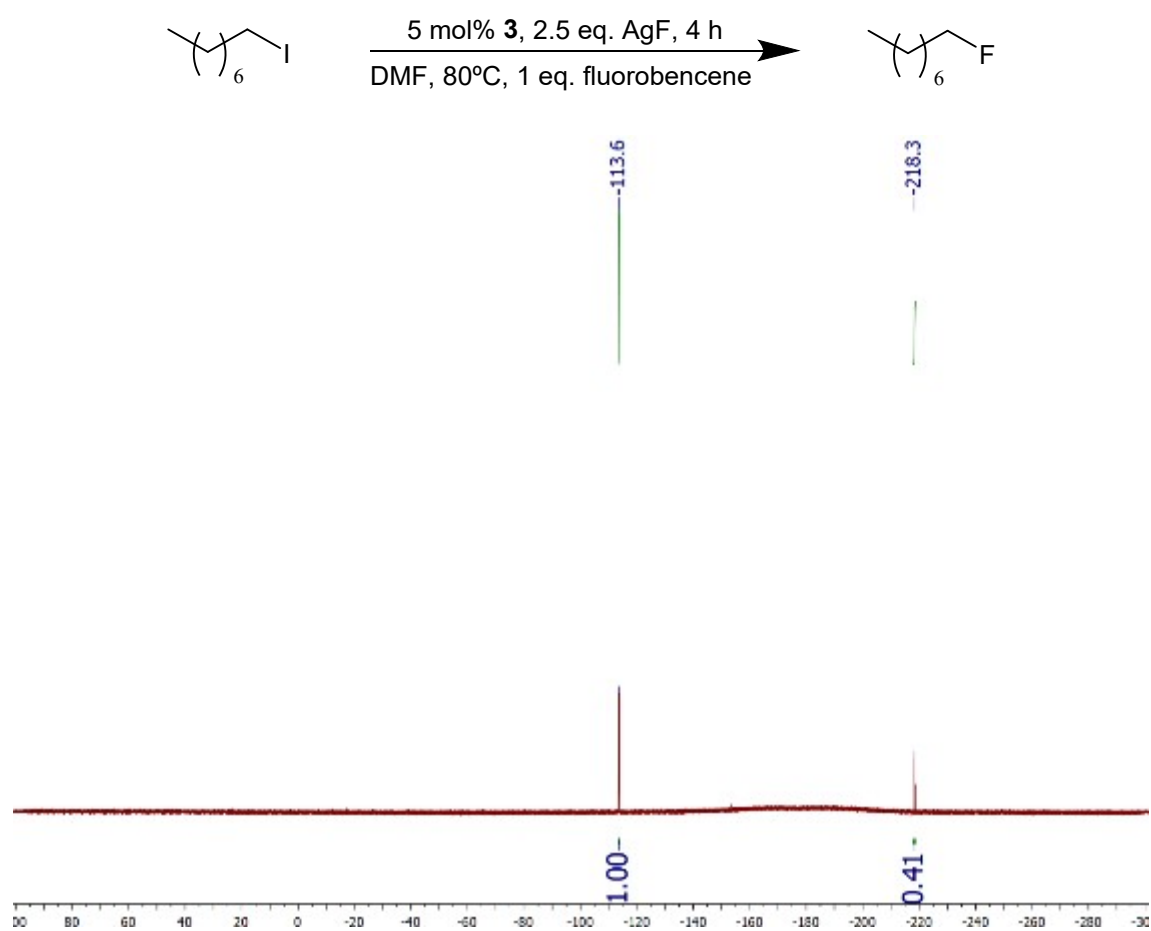

**Figure S43.** Crude  $^{19}\text{F}$  NMR in  $\text{CDCl}_3$ .

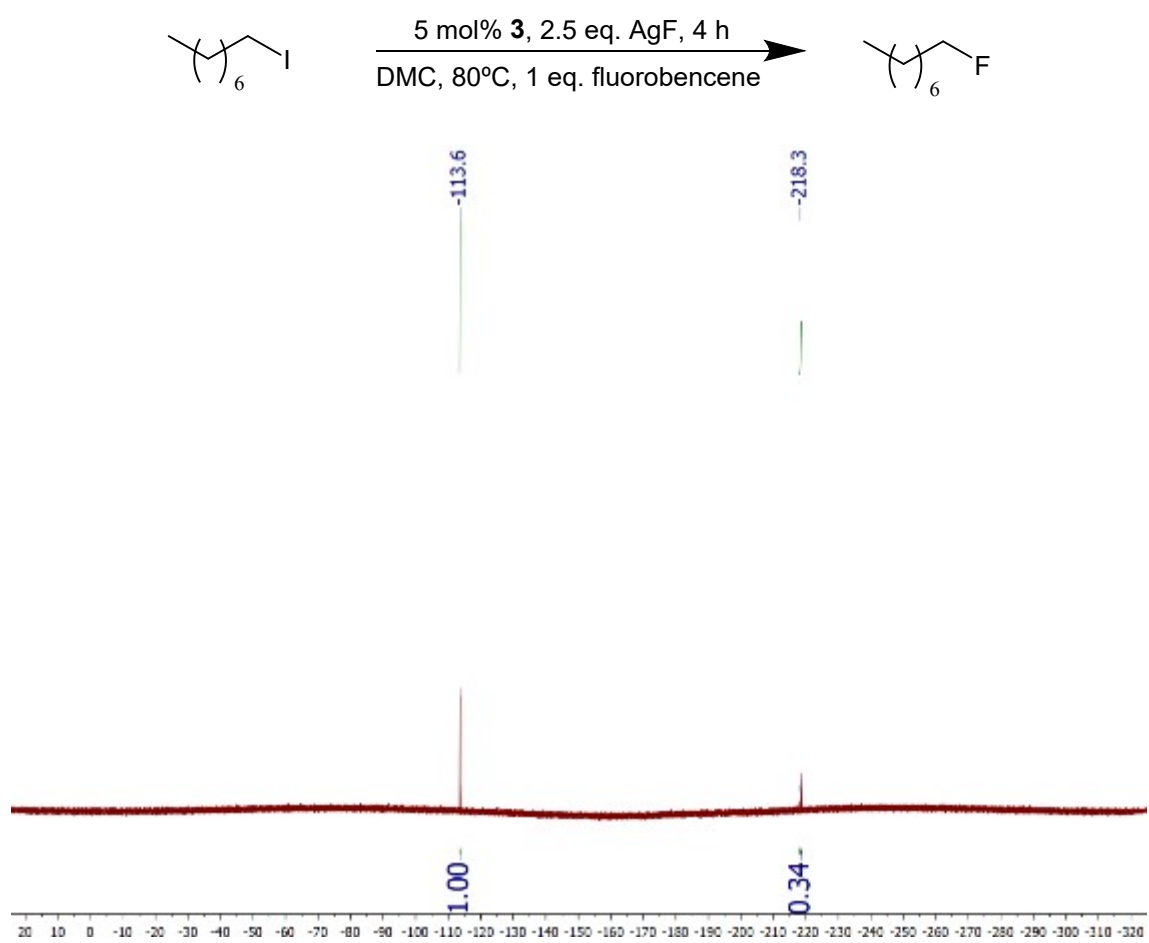

**Figure S44.** Crude  $^{19}\text{F}$  NMR in  $\text{CDCl}_3$ .

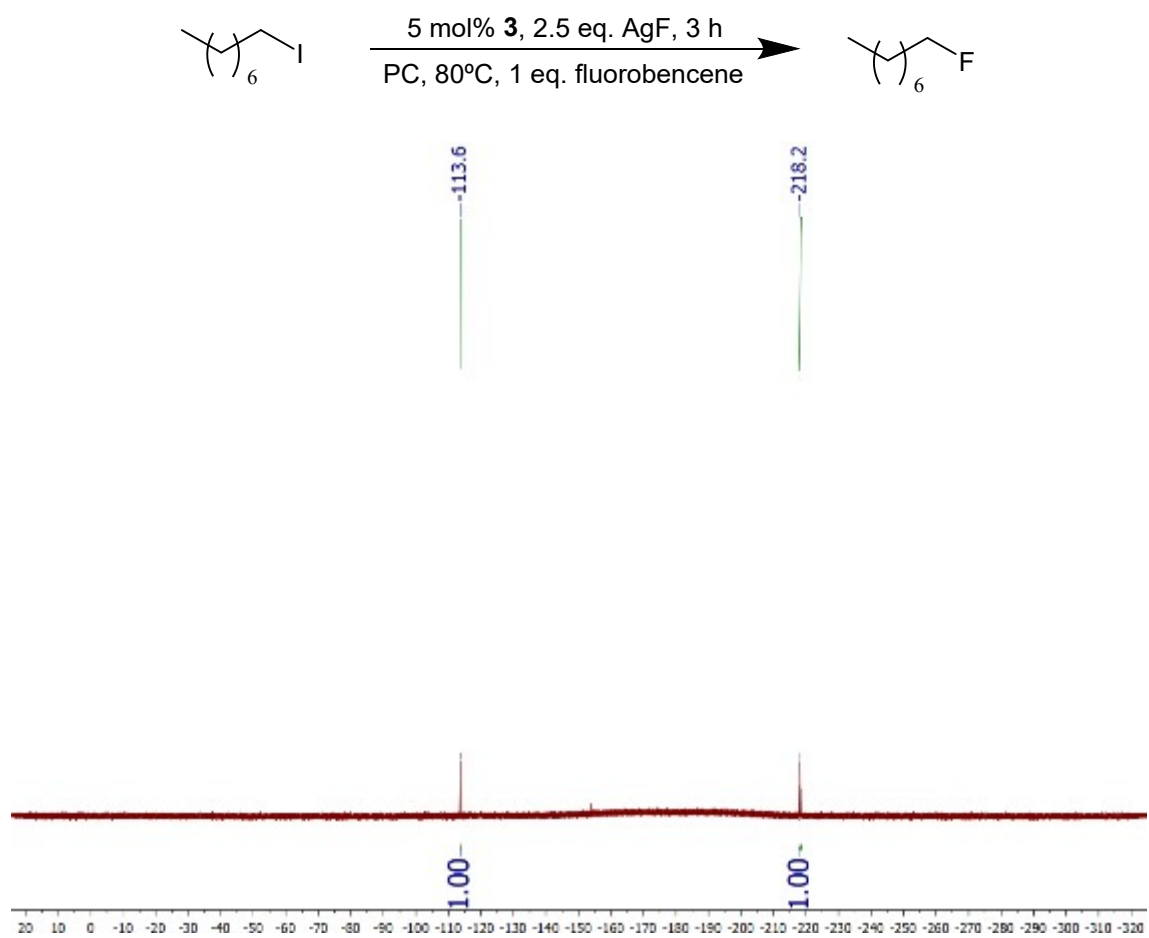

**Figure S45.** Crude  $^{19}\text{F}$  NMR in  $\text{CDCl}_3$ .

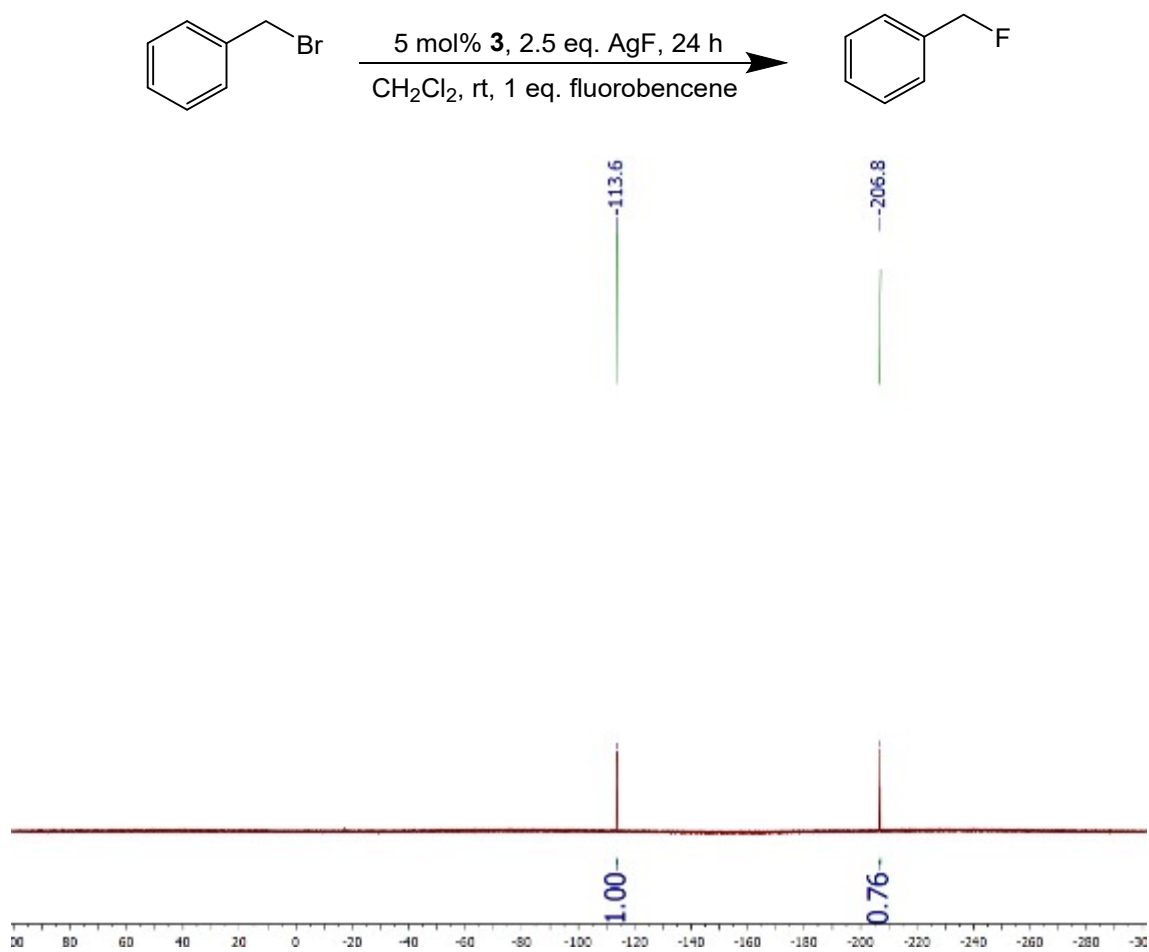

**Figure S46.** Crude  $^{19}\text{F}$  NMR in  $\text{CDCl}_3$ .



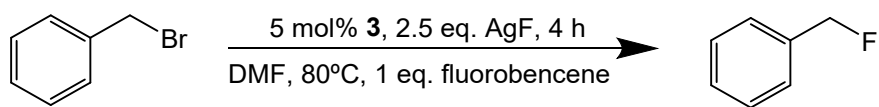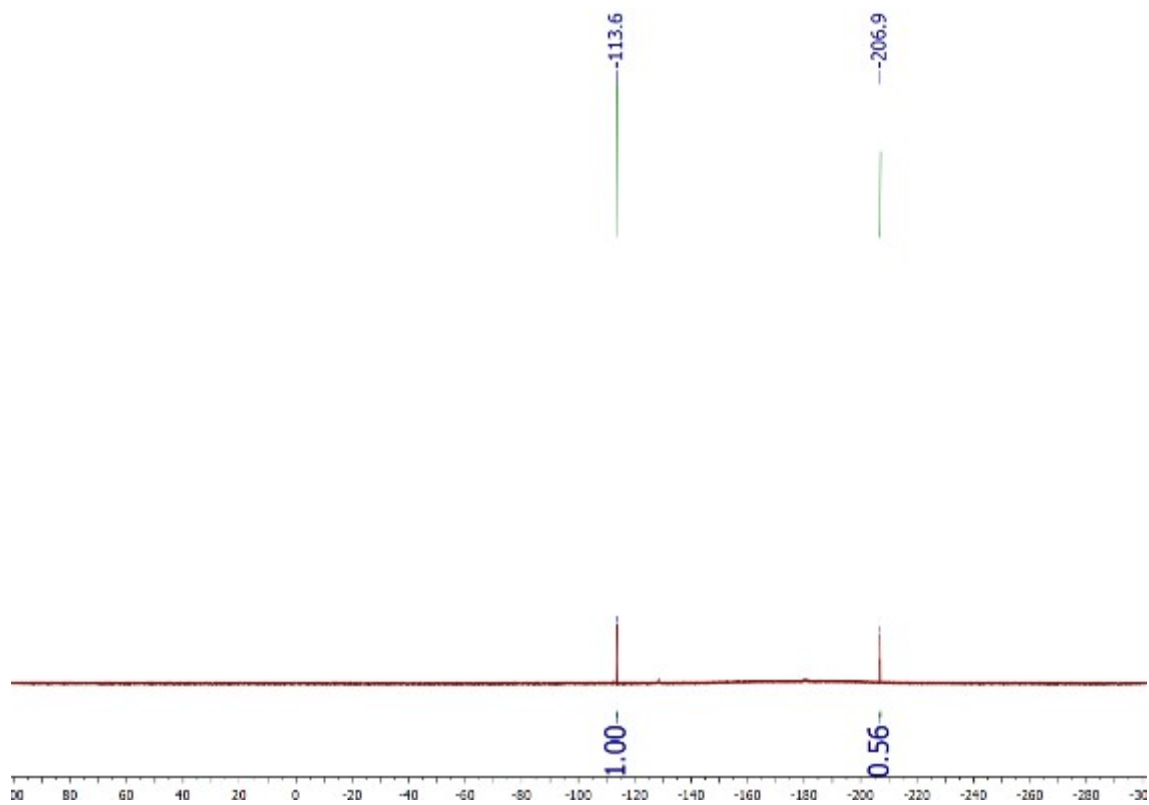

**Figure S47.** Crude  $^{19}\text{F}$  NMR in  $\text{CDCl}_3$ .

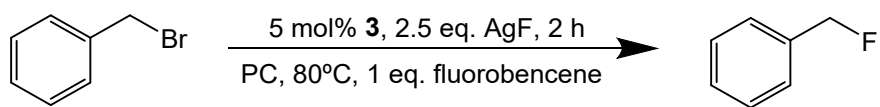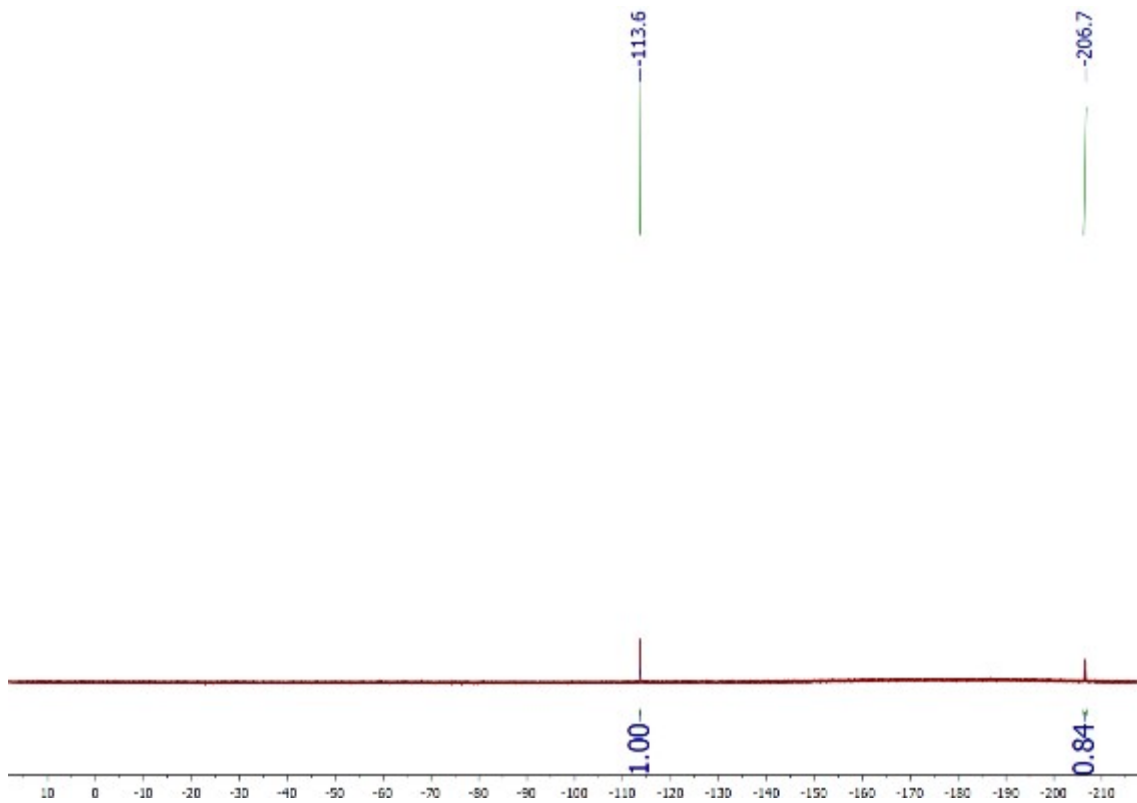

**Figure S48.** Crude  $^{19}\text{F}$  NMR in  $\text{CDCl}_3$ .

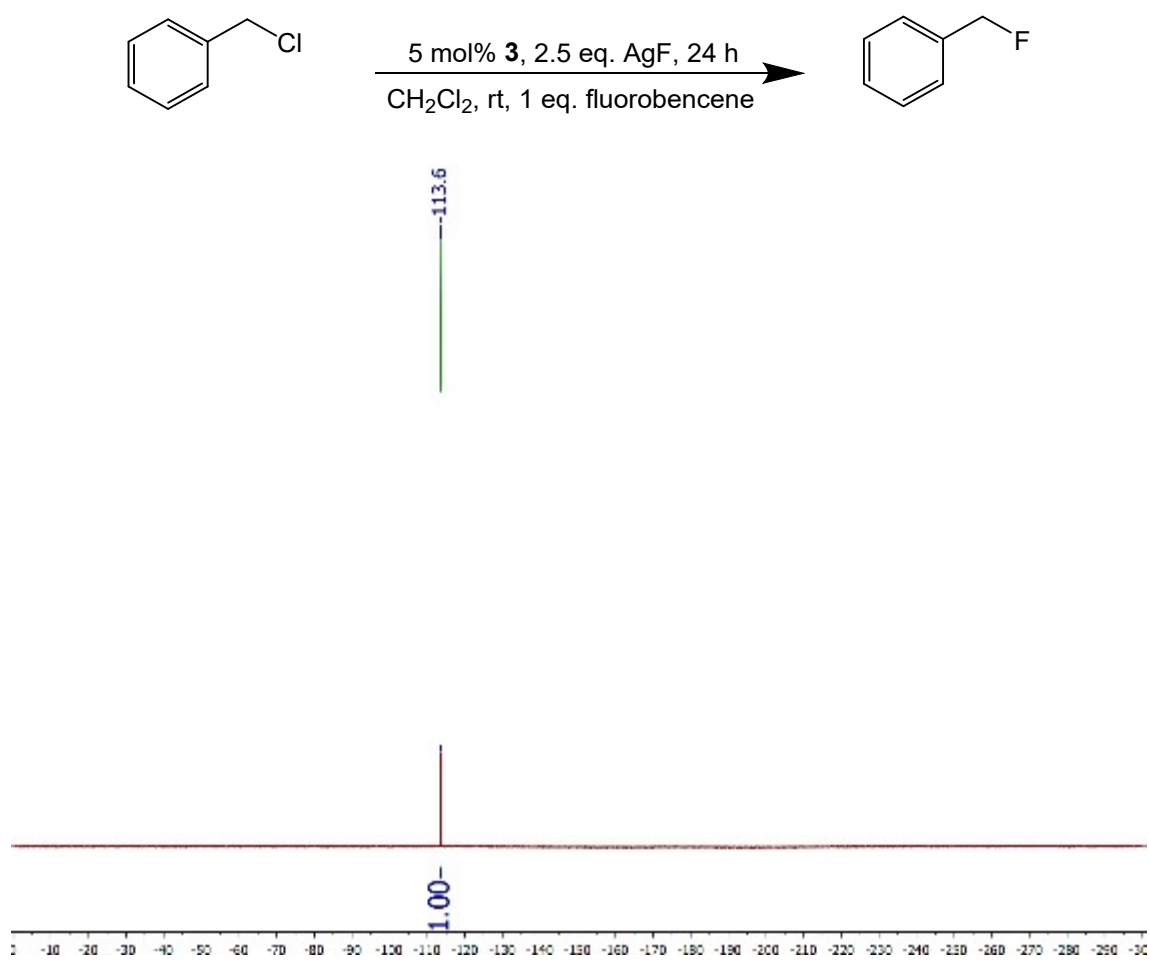

**Figure S49.** Crude  $^{19}\text{F}$  NMR in  $\text{CDCl}_3$ .

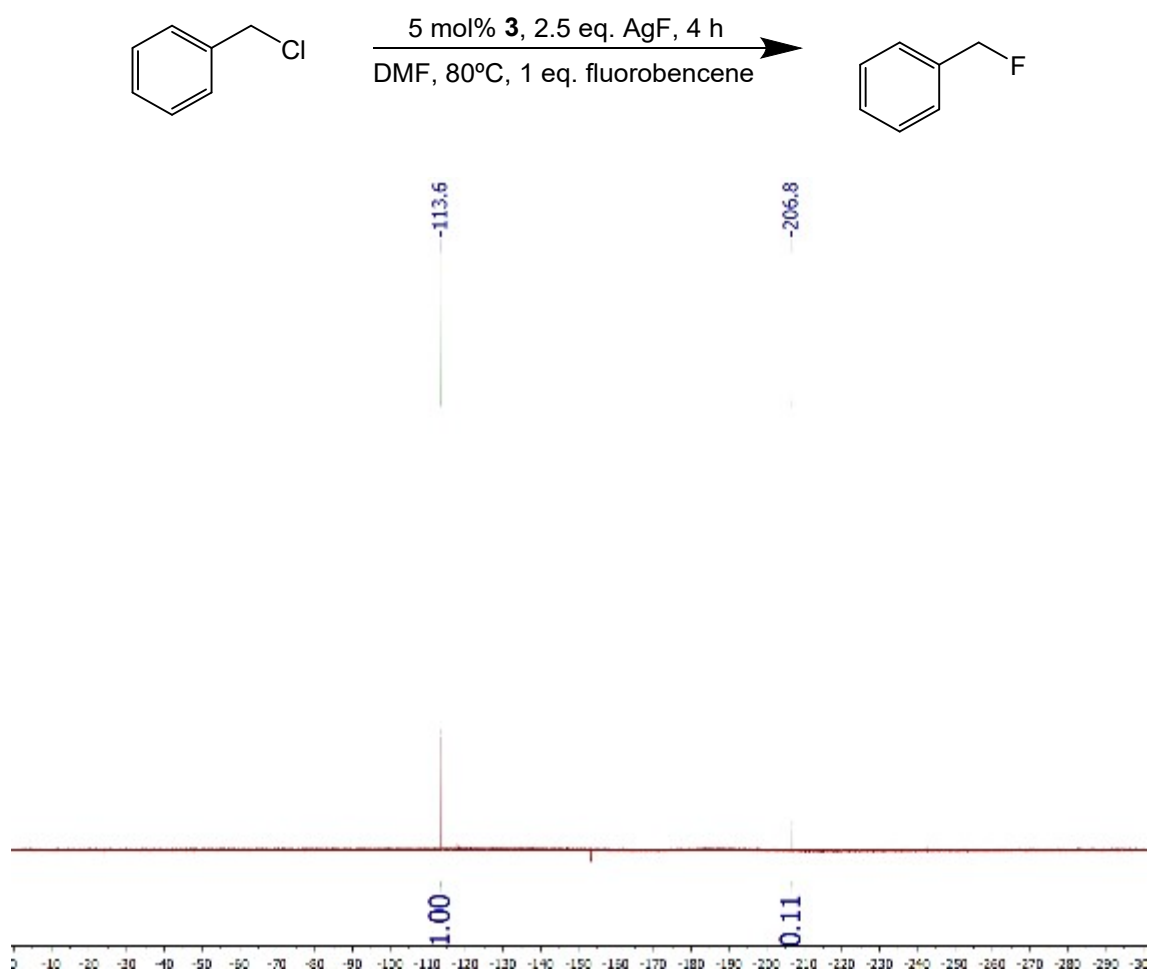

**Figure S50.** Crude  $^{19}\text{F}$  NMR in  $\text{CDCl}_3$ .

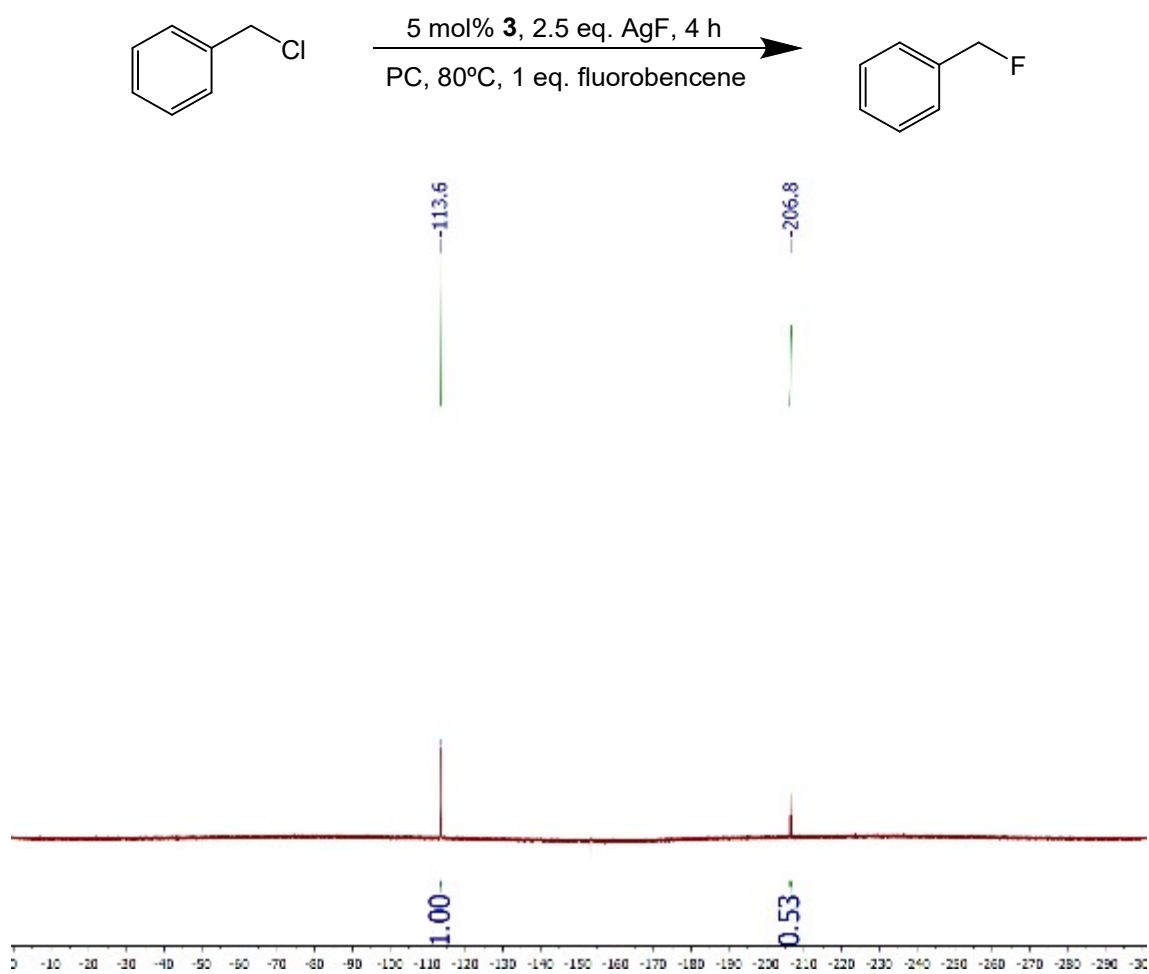

**Figure S51.** Crude  $^{19}\text{F}$  NMR in  $\text{CDCl}_3$ .

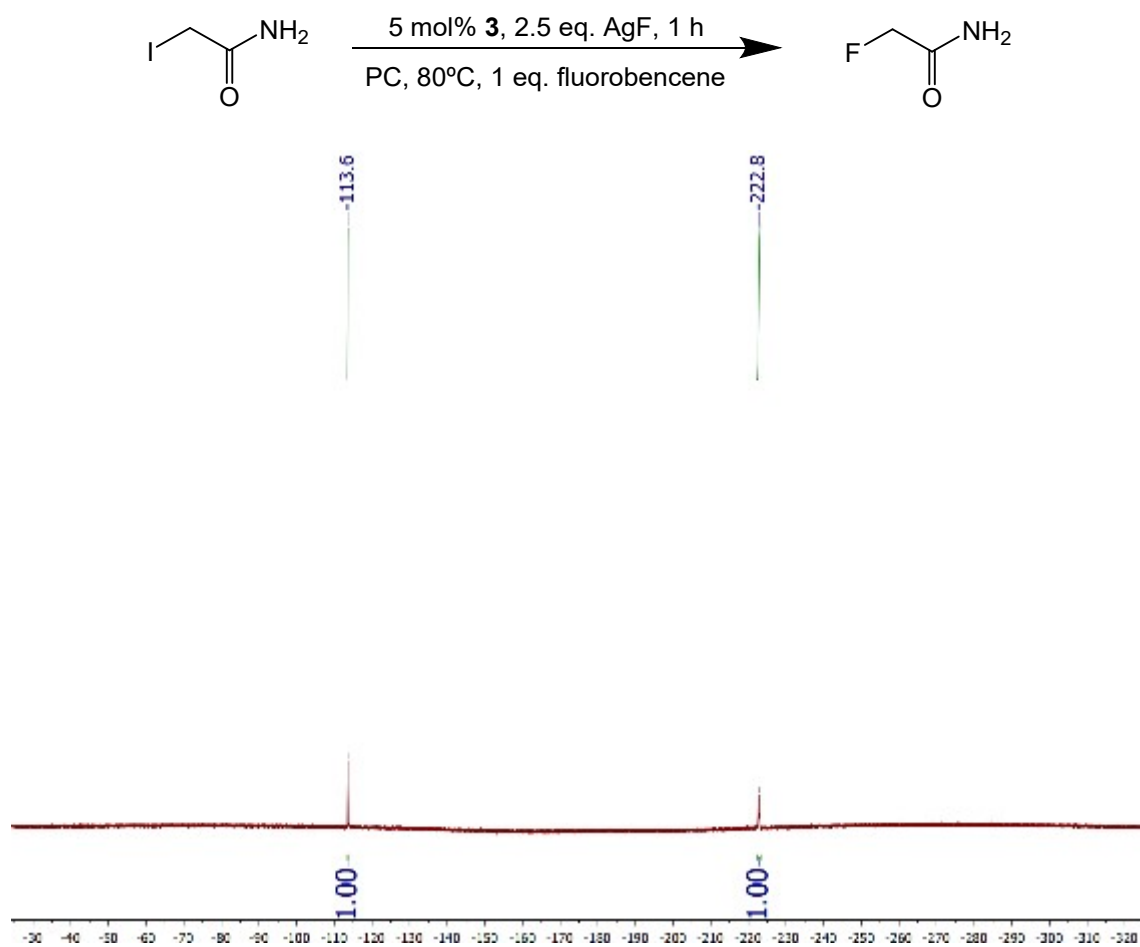

**Figure S52.** Crude  $^{19}\text{F}$  NMR in  $\text{CDCl}_3$ .

**Table 3**

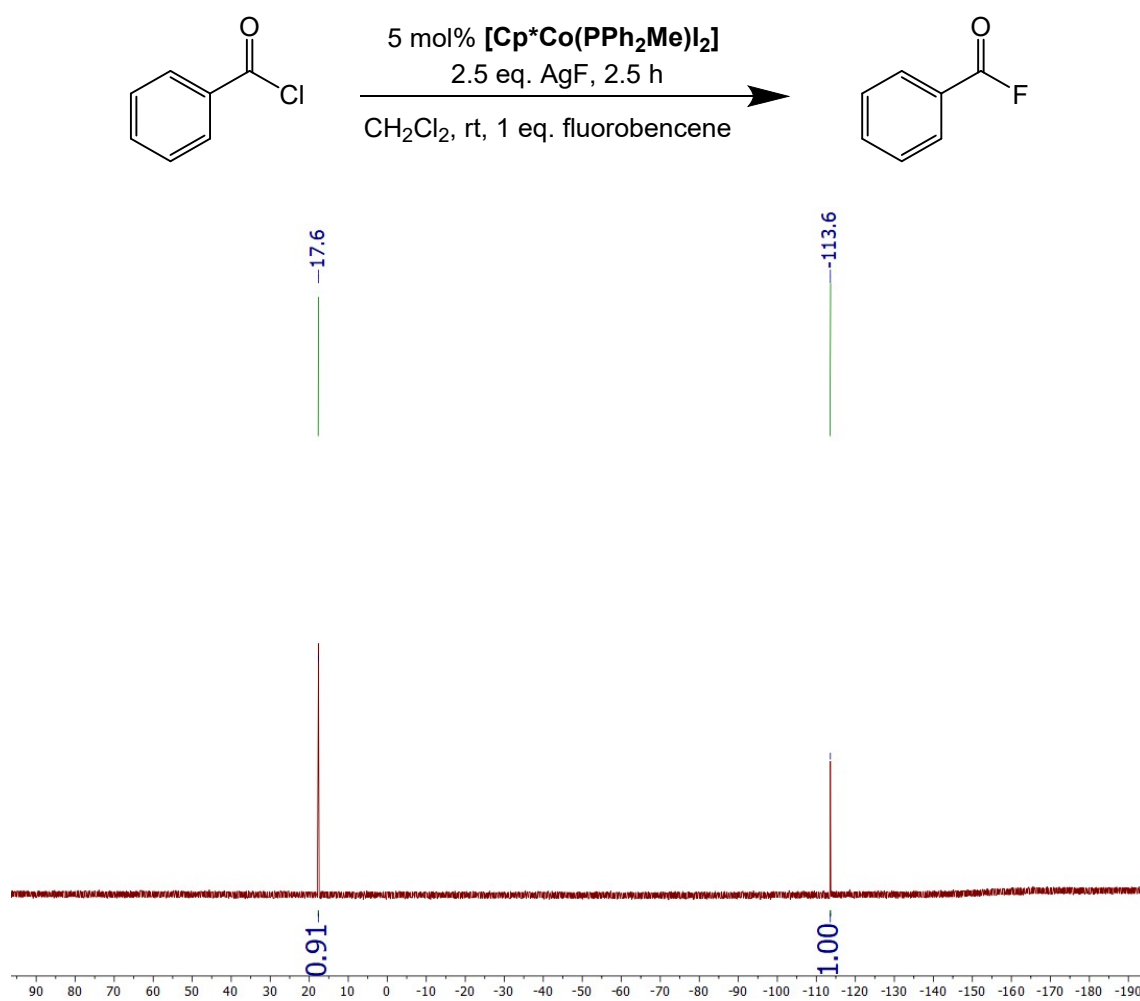

**Figure S53.**  $^{19}\text{F}\{^1\text{H}\}$  NMR in  $\text{CDCl}_3$ .

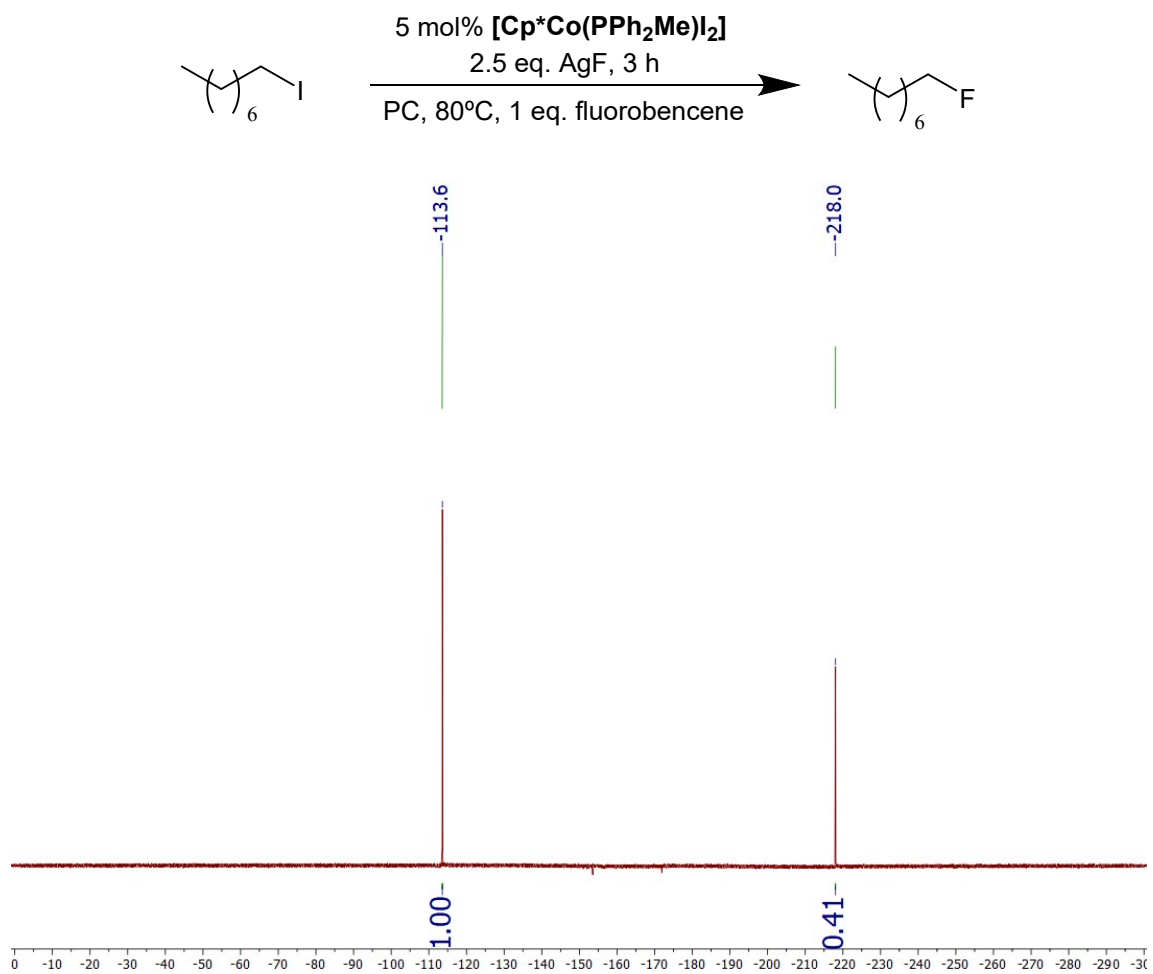

Figure S54.  $^{19}\text{F}\{^1\text{H}\}$  NMR in  $\text{CDCl}_3$ .



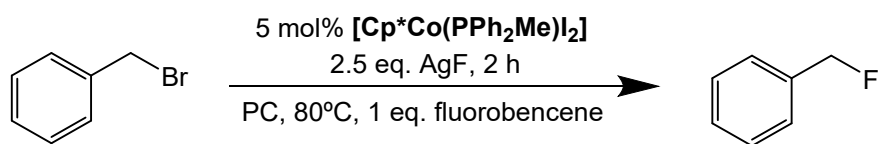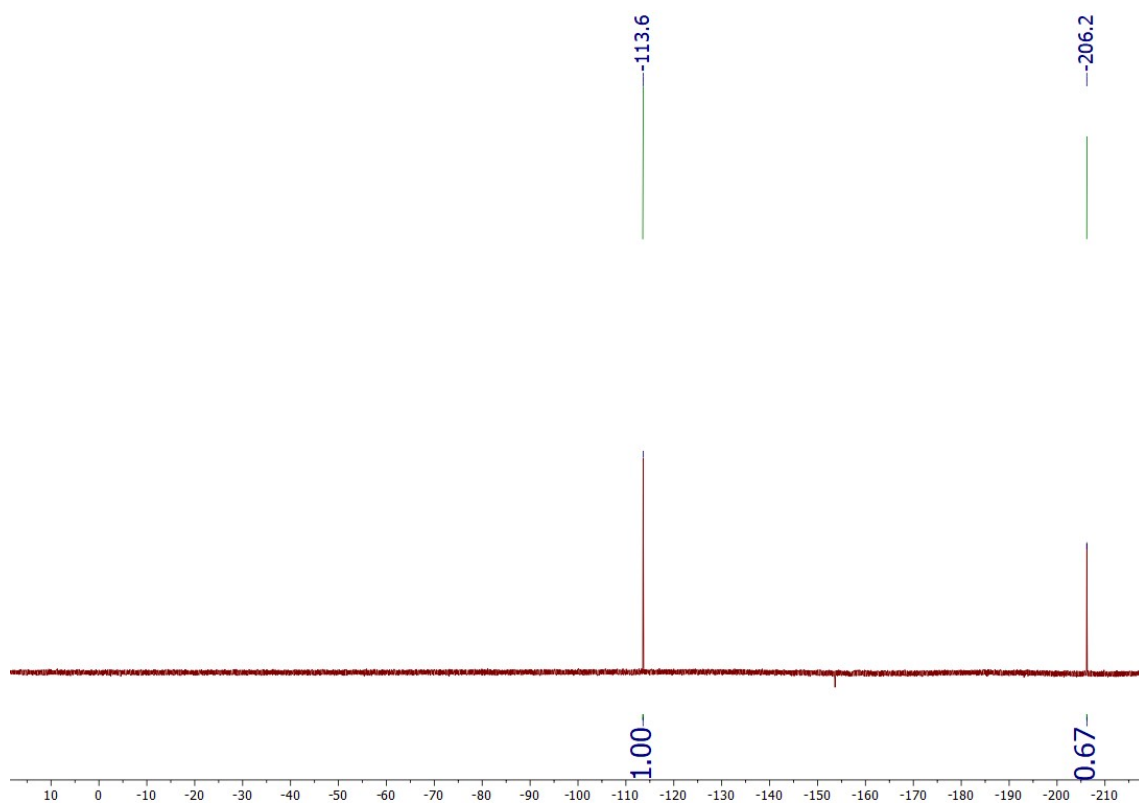

Figure S55.  $^{19}\text{F}\{^1\text{H}\}$  NMR in  $\text{CDCl}_3$ .

### 3. Synthesis and characterization of isovaleryl fluoride

**Synthesis of isovaleryl fluoride.** A glass vial was charged with **3** (38.2 mg, 0.05 mmol), isovaleryl chloride (122  $\mu$ L, 1.00 mmol), AgF (317.2 mg, 2.5 mmol) and 1 mL of PC. The mixture thus obtained was capped, covered with aluminium foil and heated to 80  $^{\circ}$ C. After 1 hour, the reaction was allowed to cool down to room temperature and the title compound was purified by vacuum distillation to obtain 91 mg of a colourless oil (0.87 mmol, 87% yield).

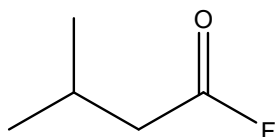

$^1\text{H}$  NMR ( $\text{CDCl}_3$ , 400 MHz):  $\delta$  2.32 (dd, 2H,  $\text{CH}_2$ ), 2.08 (hept,  $^3J_{\text{H-H}} = 6.7$ , 1H,  $\text{CH}$ ), 0.96 (d,  $^3J_{\text{H-H}} = 6.7$ , 6H,  $\text{CH}_3$ ). APT NMR,  $^1\text{H}$ - $^{13}\text{C}$  HSQC,  $^1\text{H}$ - $^{13}\text{C}$  HMBC ( $\text{CDCl}_3$ , 101 MHz):  $\delta$  162.7 (d,  $^1J_{\text{F-C}} = 361.4$ , CO), 40.9 (d,  $^2J_{\text{F-C}} = 47.9$ ,  $\text{CH}_2$ ), 25.0 (s,  $\text{CH}$ ), 22.0 (s,  $\text{CH}_3$ ).  $^{19}\text{F}\{^1\text{H}\}$  NMR ( $\text{CDCl}_3$ , 376 MHz):  $\delta$  47.7 (s,  $\text{F}$ ).

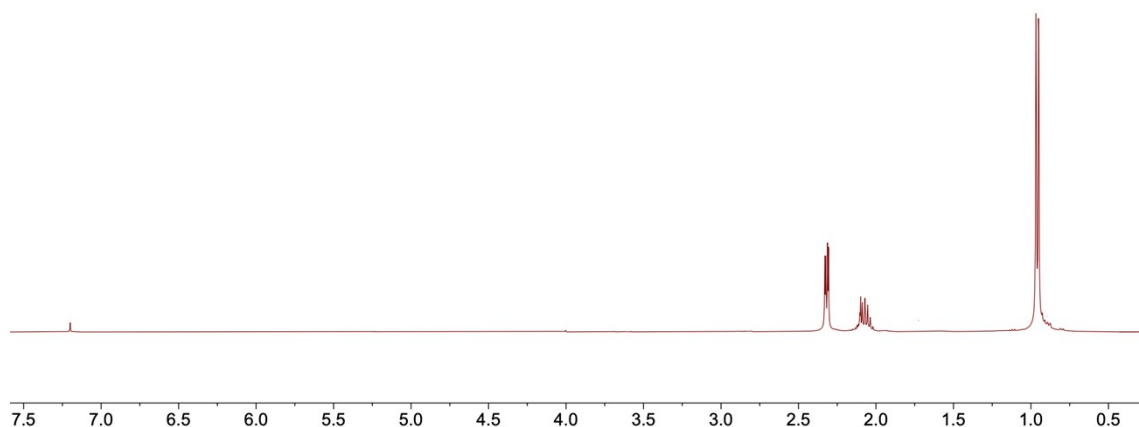

**Figure S56.**  $^1\text{H}$  NMR of isovaleryl fluoride in  $\text{CDCl}_3$ .

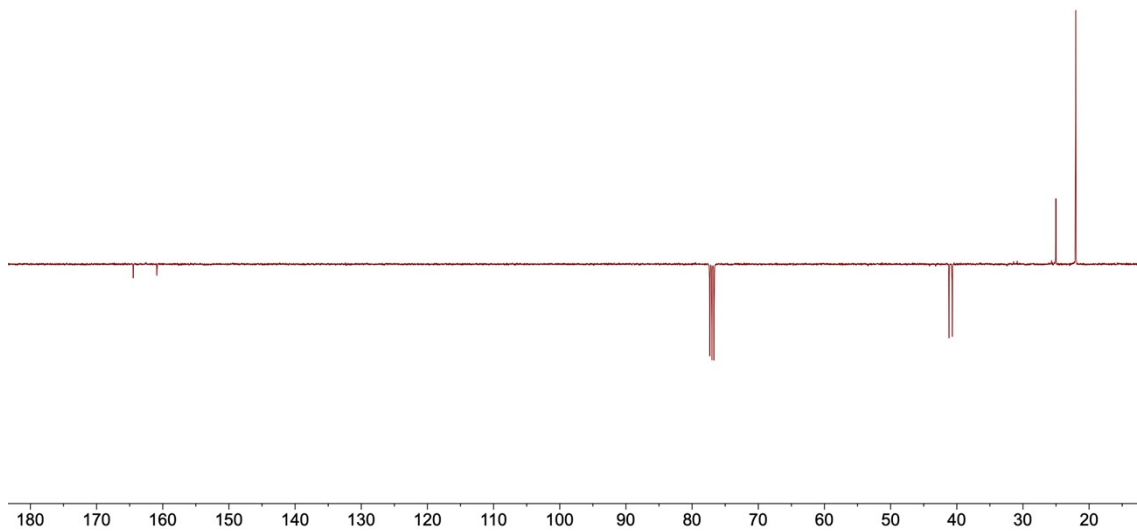

**Figure S57.** APT NMR of isovaleryl fluoride in  $\text{CDCl}_3$ .

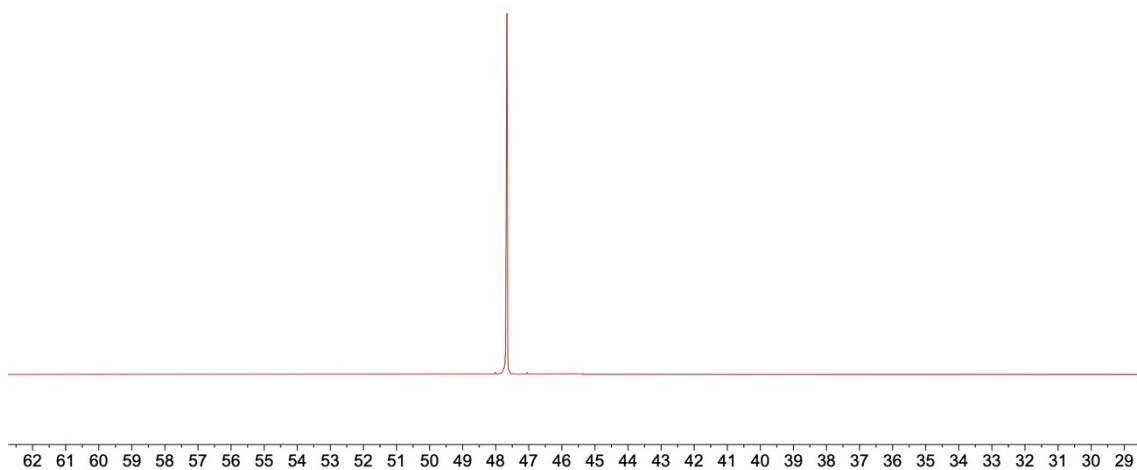

**Figure S58.**  $^{19}\text{F}\{^1\text{H}\}$  NMR of isovaleryl fluoride in  $\text{CDCl}_3$ .

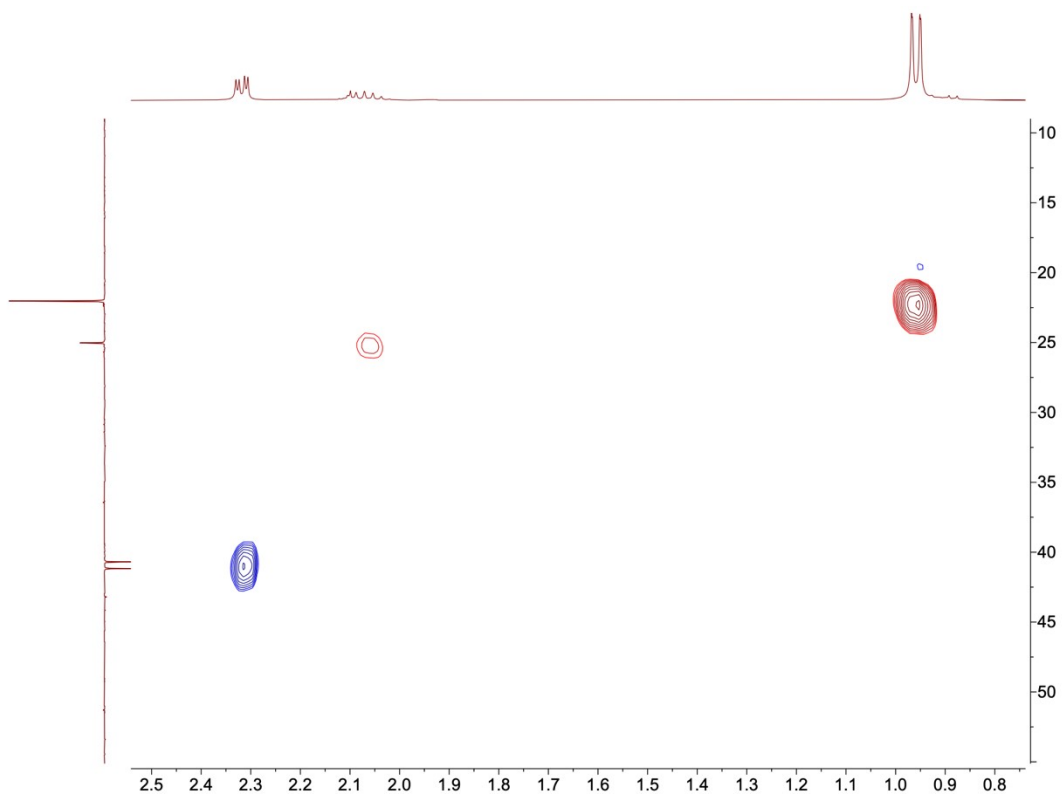

**Figure S59.**  $^1\text{H}$ - $^{13}\text{C}$  HSQC NMR of isovaleryl fluoride in  $\text{CDCl}_3$ .

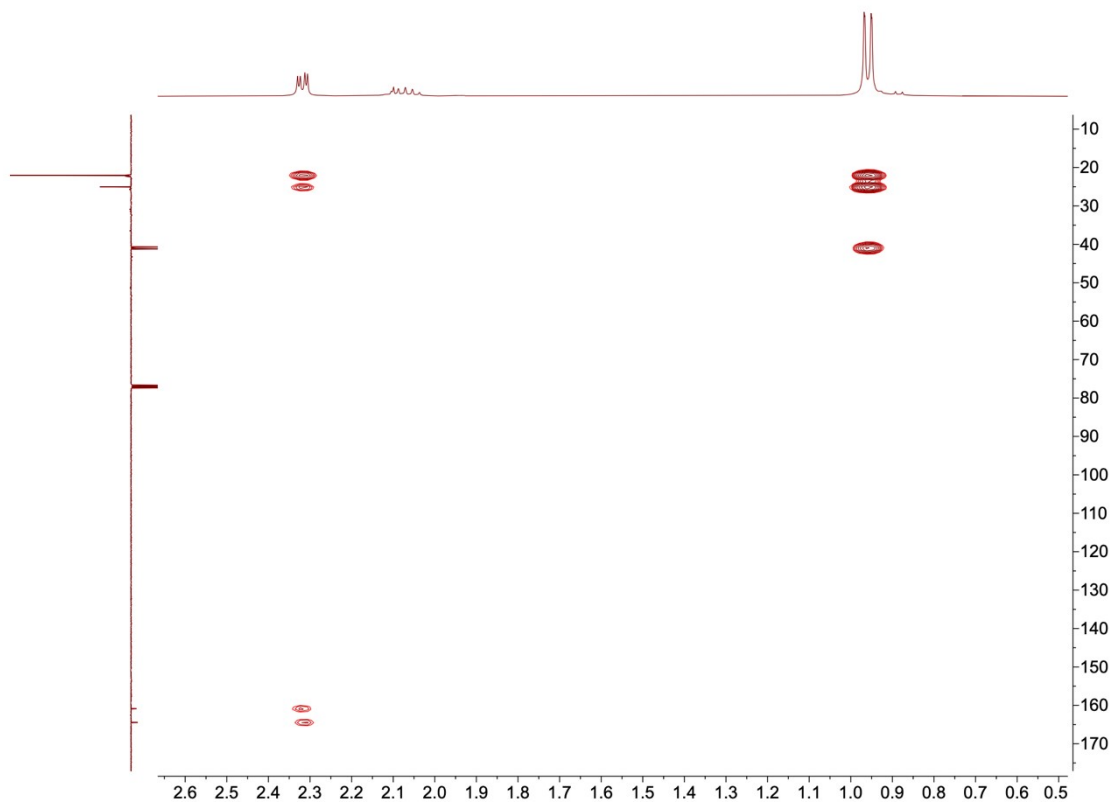

**Figure S60.**  $^1\text{H}$ - $^{13}\text{C}$  HMBC NMR of isovaleryl fluoride in  $\text{CDCl}_3$ .

#### 4. DFT calculations

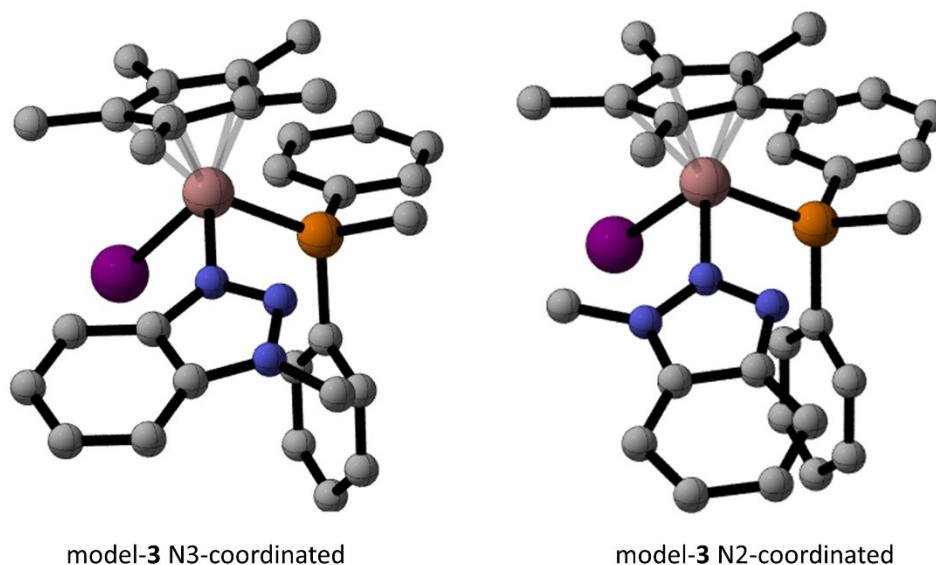

**Figure S61.** Model for the coordination of the benzotriazole scaffold to the Co center. Hydrogen atoms have been omitted for clarity.

**Table S1.** Comparison of the relative Gibbs energy for the two possible coordination modes of the model for the benzotriazole-based ligand. Geometrical optimizations and thermochemistry corrections with def2-SVP basis set, E(DZ), and further refinement by single point calculations with def2-TZVP, E(TZ). Corr. G(1M) corresponds to the correction to be added to E(TZ) to calculate the Gibbs energy (reference concentration of  $1 \text{ mol}\cdot\text{L}^{-1}$ ), G (1M, TZ). Energies are expressed in a.u.

|                       | E (DZ)     | Corr. G(1M) | E (TZ)     | G (1M, TZ) |
|-----------------------|------------|-------------|------------|------------|
| <b>N3-coordinated</b> | -3349.1200 | -3348.6045  | -3350.8333 | -3350.3148 |
| <b>N2-coordinated</b> | -3349.1126 | -3348.5968  | -3350.8259 | -3350.3070 |

**Table S2.** Comparison of the activation barrier ( $\Delta G^\ddagger$ ) and reaction Gibbs energy ( $\Delta G_{\text{react}}$ ) – in  $\text{kcal}\cdot\text{mol}^{-1}$ , calculated as explained in the Experimental Section – for the nucleophilic fluorination of benzoyl chloride as a function of the exchange-correlation functional.

|                           | M06-L | M06   | B3LYP | TPSSh | TPSS  |
|---------------------------|-------|-------|-------|-------|-------|
| $\Delta G^\ddagger$       | 16.6  | 23.7  | 15.3  | 30.7  | 29.1  |
| $\Delta G_{\text{react}}$ | -16.8 | -18.5 | -19.4 | -15.9 | -15.2 |

**Table S3.** Electronic energy and Gibbs energy difference – in kcal·mol<sup>-1</sup>, calculated as explained in the Experimental Section – for the nucleophilic fluorination of benzoyl chloride as a function of the exchange-correlation functional.

|                        |                          | M06-L | M06 | B3LYP | TPSSh | TPSS |
|------------------------|--------------------------|-------|-----|-------|-------|------|
| $\Delta E_{T-S}^{[a]}$ | <b>A<sub>Co-F</sub></b>  | 12.6  | 4.1 | 5.1   | 10.4  | 15.2 |
|                        | <b>TS<sub>A-B</sub></b>  | 12.7  | 3.3 | 5.4   | 7.0   | 12.6 |
|                        | <b>B<sub>Co-Cl</sub></b> | 13.4  | 5.7 | 6.2   | 10.6  | 15.6 |
| $\Delta G_{T-S}^{[a]}$ | <b>A<sub>Co-F</sub></b>  | 9.6   | 1.1 | 0.1   | 7.6   | 12.7 |
|                        | <b>TS<sub>A-B</sub></b>  | 9.8   | 0.3 | 0.2   | 1.8   | 7.4  |
|                        | <b>B<sub>Co-Cl</sub></b> | 10.4  | 2.7 | 2.2   | 7.1   | 12.1 |

[a]  $\Delta E_{T-S}$  and  $\Delta G_{T-S}$  correspond to the electronic energy and Gibbs energy difference between the optimized triplet and singlet state of the same structure, that is, positive values correspond to situations in which the most stable structure is the singlet state.

**Table S4.** Electronic energy and Gibbs energy difference – in kcal·mol<sup>-1</sup>, calculated as explained in the Experimental Section – for the Co–F assisted S<sub>N</sub>2 fluorination reaction of benzyl bromide and 1-iodooctane for M06-L functional.

|                        | $\Delta G_{T-S}$                                              | M06-L |
|------------------------|---------------------------------------------------------------|-------|
| $\Delta E_{T-S}^{[a]}$ | <b>A<sub>Co-F</sub></b>                                       | 12.6  |
|                        | <b>TS<sub>A-B'</sub>- S<sub>N</sub>2 (BnBr)<sup>[b]</sup></b> | 11.4  |
|                        | <b>TS<sub>A-B'</sub>- S<sub>N</sub>2 (1-I)<sup>[b]</sup></b>  | 12.3  |
|                        | <b>B'<sub>Co-Br</sub></b>                                     | 13.2  |
|                        | <b>B'<sub>Co-I</sub></b>                                      | 10.9  |
| $\Delta G_{T-S}^{[a]}$ | <b>A<sub>Co-F</sub></b>                                       | 9.6   |
|                        | <b>TS<sub>A-B'</sub>- S<sub>N</sub>2 (BnBr)</b>               | 8.6   |
|                        | <b>TS<sub>A-B'</sub>- S<sub>N</sub>2 (1-I)</b>                | 8.2   |
|                        | <b>B'<sub>Co-Br</sub></b>                                     | 10.7  |
|                        | <b>B'<sub>Co-I</sub></b>                                      | 7.3   |

[a]  $\Delta E_{T-S}$  and  $\Delta G_{T-S}$  correspond to the electronic energy and Gibbs energy difference between the optimized triplet and singlet state of the same structure, that is, positive values correspond to situations in which the most stable structure is the singlet state. [b] *BnBr* corresponds to benzyl bromide, and *I-I* to 1-iodooctane.

**Table S5.** Energy data for the DFT-computed intermediates and transition states for the nucleophilic fluorination reaction computed at the M06-L (SMD =

dichloromethane)/def2-TZVP//def2-SVP level of theory in the singlet electronic state. Geometrical optimizations and thermochemistry corrections with def2-SVP basis set, E(DZ), and further refinement by single point calculations with def2-TZVP, E(TZ). Corr. G(1M) corresponds to the correction to be added to E(TZ) to calculate the Gibbs energy (reference concentration of 1 mol·L<sup>-1</sup>), G (1M.). Absolute energies are in a.u. and relative Gibbs energies (with respect to **A**<sub>Co-F</sub> and benzyl chloride) in kcal·mol<sup>-1</sup>.

|                               | E (DZ)     | Corr. G(1M) | E (TZ)     | G (1M, TZ) | $\Delta G$ (1M, TZ) |
|-------------------------------|------------|-------------|------------|------------|---------------------|
| <b>A</b> <sub>Co-F</sub>      | -3210.3869 | 0.4727      | -3212.2876 | -3211.8149 | <b>0.0</b>          |
| <b>TS</b> <sub>A-B</sub>      | -4015.1552 | 0.5643      | -4017.5640 | -4016.9996 | <b>16.6</b>         |
| <b>TS</b> <sub>A-B-meta</sub> | -4015.1089 | 0.5643      | -4017.5158 | -4016.9514 | <b>46.8</b>         |
| <b>B</b> <sub>Co-Cl</sub>     | -3570.7209 | 0.4714      | -3572.6469 | -3572.1755 | <b>-16.8</b>        |
| <b>Benzoyl chloride</b>       | -804.7638  | 0.0707      | -805.2819  | -805.2112  |                     |
| <b>Benzoyl fluoride</b>       | -444.4625  | 0.0739      | -444.9513  | -444.8774  |                     |

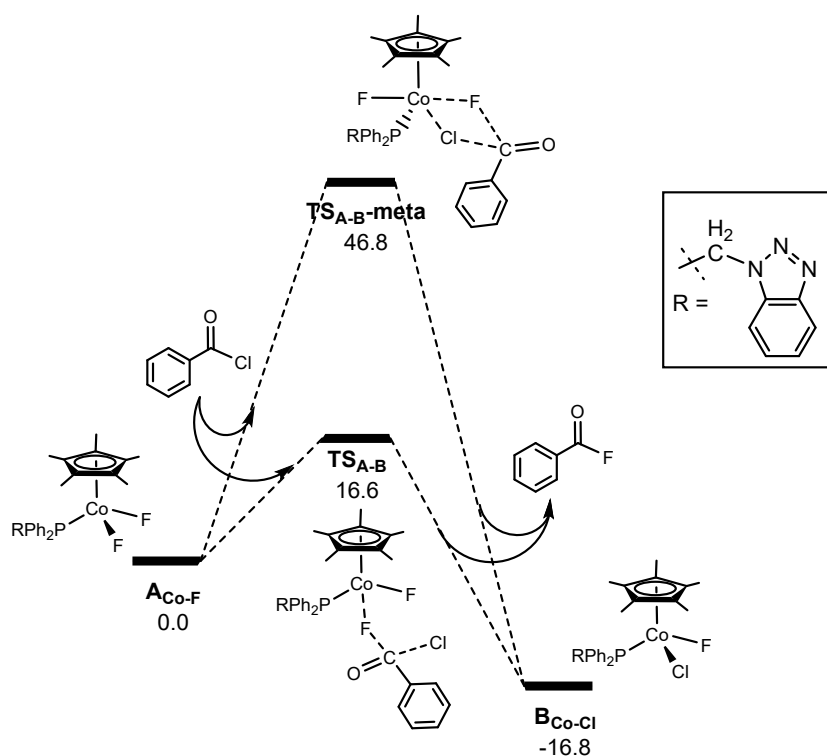

**Figure S62.** Comparison between the two possible alternatives for the fluorination of benzoyl chloride.

**Table S6.** Energy data for the DFT-computed intermediates and transition states for the nucleophilic fluorination reaction computed at the M06-L (SMD =

dichloromethane)/def2-TZVP//def2-SVP level of theory in the triplet electronic state. Energies are in a.u.

|                                            | E (DZ)     | Corr.<br>G(1M) | E (TZ)     | G (1M, TZ) |
|--------------------------------------------|------------|----------------|------------|------------|
| <sup>3</sup> A <sub>C<sub>0</sub>-F</sub>  | -3210.3682 | 0.4679         | -3212.2674 | -3211.7996 |
| <sup>3</sup> TS <sub>A-B</sub>             | -4015.1355 | 0.5596         | -4017.5436 | -4016.9841 |
| <sup>3</sup> B <sub>C<sub>0</sub>-Cl</sub> | -3570.7012 | 0.4666         | -3572.6256 | -3572.1589 |

**Table S7.** Energy data for the DFT-computed intermediates and transition states for the nucleophilic fluorination reaction computed at the M06 (SMD = dichloromethane)/def2-TZVP//M06-L/def2-SVP level of theory in the singlet electronic state. Absolute energies are in a.u. and relative Gibbs energies (with respect to A<sub>C<sub>0</sub>-F</sub> and benzoyl chloride) in kcal·mol<sup>-1</sup>.

|                               | Corr. G(1M) | E (TZ)     | G (TZ) 1M  | ΔG 1M (TZ)   |
|-------------------------------|-------------|------------|------------|--------------|
| A <sub>C<sub>0</sub>-F</sub>  | 0.4727      | -3211.3787 | -3210.9060 | <b>0.0</b>   |
| TS <sub>A-B</sub>             | 0.5643      | -4016.4387 | -4015.8743 | <b>23.7</b>  |
| B <sub>C<sub>0</sub>-Cl</sub> | 0.4714      | -3571.7429 | -3571.2715 | <b>-18.5</b> |
| <b>Benzoyl chloride</b>       | 0.0707      | -805.0768  | -805.0060  |              |
| <b>Benzoyl fluoride</b>       | 0.0739      | -444.7439  | -444.6700  |              |

Note that, for M06 results, optimization was performed by means of M06-L functional, M06 single point calculations with def2-TZVP being performed afterwards. This way, Corr. G(1M) corresponds to the M06-L computed one.

**Table S8.** Energy data for the DFT-computed intermediates and transition states for the nucleophilic fluorination reaction computed at the M06 (SMD = dichloromethane)/def2-TZVP//def2-SVP level of theory in the triplet electronic state. Energies are in a.u.

|                                            | Corr.<br>G(1M) | E (TZ)     | G (1M, TZ) |
|--------------------------------------------|----------------|------------|------------|
| <sup>3</sup> A <sub>C<sub>0</sub>-F</sub>  | 0.4679         | -3211.3721 | -3210.9042 |
| <sup>3</sup> TS <sub>A-B</sub>             | 0.5596         | -4016.4334 | -4015.8739 |
| <sup>3</sup> B <sub>C<sub>0</sub>-Cl</sub> | 0.4666         | -3571.7339 | -3571.2673 |

Note that, for M06 results, optimization was performed by means of M06-L functional, M06 single point calculations with def2-TZVP being performed afterwards. This way, Corr. G(1M) corresponds to the M06-L computed one.



**Table S9.** Energy data for the DFT-computed intermediates and transition states for the nucleophilic fluorination reaction computed at the B3LYP-D3BJ (PCM = dichloromethane)/def2-TZVP//def2-SVP level of theory in the singlet electronic state. Absolute energies are in a.u. and relative Gibbs energies (with respect to  $A_{C_0-F}$  and benzoyl chloride) in kcal·mol<sup>-1</sup>.

|                         | E (DZ)     | Corr. G(1M) | E (TZ)     | G (1M, TZ) | $\Delta G$ (1M, TZ) |
|-------------------------|------------|-------------|------------|------------|---------------------|
| $A_{C_0-F}$             | -3210.7670 | 0.4757      | -3212.7085 | -3212.2329 | <b>0.0</b>          |
| $TS_{A-B}$              | -4015.6169 | 0.5674      | -4018.0863 | -4017.5190 | <b>15.3</b>         |
| $B_{C_0-Cl}$            | -3571.1029 | 0.4742      | -3573.0770 | -3572.6028 | <b>-19.4</b>        |
| <b>Benzoyl chloride</b> | -804.8404  | 0.0710      | -805.3815  | -805.3105  |                     |
| <b>Benzoyl fluoride</b> | -444.5407  | 0.0740      | -445.0454  | -444.9714  |                     |

**Table S10.** Energy data for the DFT-computed intermediates and transition states for the nucleophilic fluorination reaction computed at the B3LYP-D3BJ (PCM = dichloromethane)/def2-TZVP//def2-SVP level of theory in the triplet electronic state. Energies are in a.u.

|                | E (DZ)     | Corr. G(1M) | E (TZ)     | G (1M, TZ) |
|----------------|------------|-------------|------------|------------|
| $^3A_{C_0-F}$  | -3210.7578 | 0.4676      | -3212.7004 | -3212.2328 |
| $^3TS_{A-B}$   | -4015.6069 | 0.5591      | -4018.0778 | -4017.5187 |
| $^3B_{C_0-Cl}$ | -3571.0928 | 0.4678      | -3573.0670 | -3572.5993 |

**Table S11.** Energy data for the DFT-computed intermediates and transition states for the nucleophilic fluorination reaction computed at the TPSSh (PCM = dichloromethane)/def2-TZVP//def2-SVP level of theory in the singlet electronic state. Absolute energies are in a.u. and relative Gibbs energies (with respect to  $A_{C_0-F}$  and benzoyl chloride) in kcal·mol<sup>-1</sup>.

|                         | E (DZ)     | Corr. G(1M) | E (TZ)     | G (1M, TZ) | $\Delta G$ (1M, TZ) |
|-------------------------|------------|-------------|------------|------------|---------------------|
| $A_{C_0-F}$             | -3210.7196 | 0.4693      | -3212.6110 | -3212.1417 | <b>0.0</b>          |
| $TS_{A-B}$              | -4015.5472 | 0.5626      | -4017.9542 | -4017.3916 | <b>30.7</b>         |
| $B_{C_0-Cl}$            | -3571.0572 | 0.4697      | -3572.9786 | -3572.5088 | <b>-15.9</b>        |
| <b>Benzoyl chloride</b> | -804.8412  | 0.0707      | -805.3695  | -805.2988  |                     |
| <b>Benzoyl fluoride</b> | -444.5376  | 0.0736      | -445.0307  | -444.9571  |                     |

**Table S12.** Energy data for the DFT-computed intermediates and transition states for the nucleophilic fluorination reaction computed at the TPSSh (PCM = dichloromethane)/def2-TZVP//def2-SVP level of theory in the triplet electronic state. Energies are in a.u.

|                                         | E (DZ)     | Corr. G(1M) | E (TZ)     | G (1M, TZ)  |
|-----------------------------------------|------------|-------------|------------|-------------|
| ${}^3\mathbf{A}_{\text{C}_0\text{-F}}$  | -3210.7038 | 0.46494     | -3212.5945 | -3212.1296  |
| ${}^3\mathbf{TS}_{\text{A-B}}$          | -4015.5343 | 0.55438     | -4017.9431 | -4017.38878 |
| ${}^3\mathbf{B}_{\text{C}_0\text{-Cl}}$ | -3571.0407 | 0.46414     | -3572.9616 | -3572.4975  |

**Table S13.** Energy data for the DFT-computed intermediates and transition states for the nucleophilic fluorination reaction computed at the TPSS (PCM = dichloromethane)/def2-TZVP//def2-SVP level of theory in the singlet electronic state. Absolute energies are in a.u. and relative Gibbs energies (with respect to  $\mathbf{A}_{\text{C}_0\text{-F}}$  and benzoyl chloride) in kcal·mol<sup>-1</sup>.

|                                     | E (DZ)     | Corr. G(1M) | E (TZ)     | G (1M, TZ) | $\Delta\mathbf{G}$ (1M, TZ) |
|-------------------------------------|------------|-------------|------------|------------|-----------------------------|
| $\mathbf{A}_{\text{C}_0\text{-F}}$  | -3210.9274 | 0.4621      | -3212.8228 | -3212.3607 | <b>0.0</b>                  |
| $\mathbf{TS}_{\text{A-B}}$          | -4015.8032 | 0.5533      | -4018.2148 | -4017.6615 | <b>29.1</b>                 |
| $\mathbf{B}_{\text{C}_0\text{-Cl}}$ | -3571.2596 | 0.4621      | -3573.1853 | -3572.7231 | <b>-15.2</b>                |
| <b>Benzoyl chloride</b>             | -804.8876  | 0.0693      | -805.4164  | -805.3471  |                             |
| <b>Benzoyl fluoride</b>             | -444.5877  | 0.0722      | -445.0812  | -445.0090  |                             |

**Table S14.** Energy data for the DFT-computed intermediates and transition states for the nucleophilic fluorination reaction computed at the TPSS (PCM = dichloromethane)/def2-TZVP//def2-SVP level of theory in the triplet electronic state. Energies are in a.u.

|                                         | E (DZ)     | Corr. G(1M) | E (TZ)     | G (1M, TZ) |
|-----------------------------------------|------------|-------------|------------|------------|
| ${}^3\mathbf{A}_{\text{C}_0\text{-F}}$  | -3210.9042 | 0.4580      | -3212.7986 | -3212.3405 |
| ${}^3\mathbf{TS}_{\text{A-B}}$          | -4015.7812 | 0.5450      | -4018.1947 | -4017.6497 |
| ${}^3\mathbf{B}_{\text{C}_0\text{-Cl}}$ | -3571.2353 | 0.4566      | -3573.1603 | -3572.7038 |

**Table S15.** Energy data for the DFT-computed intermediates and transition states for the Co–F assisted S<sub>N</sub>2 fluorination reaction of benzyl bromide and 1-iodooctane computed at the M06-L (SMD = dichloromethane)/def2-TZVP//def2-SVP level of theory in the singlet electronic state. Absolute energies are in a.u. and relative Gibbs energies (with respect to A<sub>Co-F</sub> and acyl chloride) in kcal·mol<sup>-1</sup>.

|                                             | E (DZ)     | Corr. G(1M) | E (TZ)     | G (1M, TZ) | ΔG (1M, TZ) |
|---------------------------------------------|------------|-------------|------------|------------|-------------|
| A <sub>Co-F</sub>                           | -3210.3869 | 0.4727      | -3212.2876 | -3211.8149 | <b>0.0</b>  |
| TS <sub>A-B'</sub> -S <sub>N</sub> 2 (BnBr) | -6054.8653 | 0.5807      | -6057.3628 | -6056.7822 | <b>22.8</b> |
| TS <sub>A-B'</sub> -S <sub>N</sub> 2 (1-I)  | -3823.0855 | 0.6870      | -3825.3266 | -3824.6395 | <b>19.6</b> |
| B' <sub>Co-Br</sub>                         | -5684.4085 | 0.4708      | -5686.5003 | -5686.0294 | <b>-4.2</b> |
| B' <sub>Co-I</sub>                          | -3408.5254 | 0.4705      | -3410.3143 | -3409.8437 | <b>-7.8</b> |
| <b>Benzyl Bromide (BnBr)</b>                | -2844.4941 | 0.0886      | -2845.0921 | -2845.0035 |             |
| <b>Benzyl Fluoride (BnF)</b>                | -370.4834  | 0.0924      | -370.8880  | -370.7956  |             |
| <b>1-iodooctane (1-I)</b>                   | -612.7064  | 0.1968      | -613.0527  | -612.8559  |             |
| <b>1-fluorooctane (1-F)</b>                 | -414.5836  | 0.2005      | -415.0400  | -414.8396  |             |

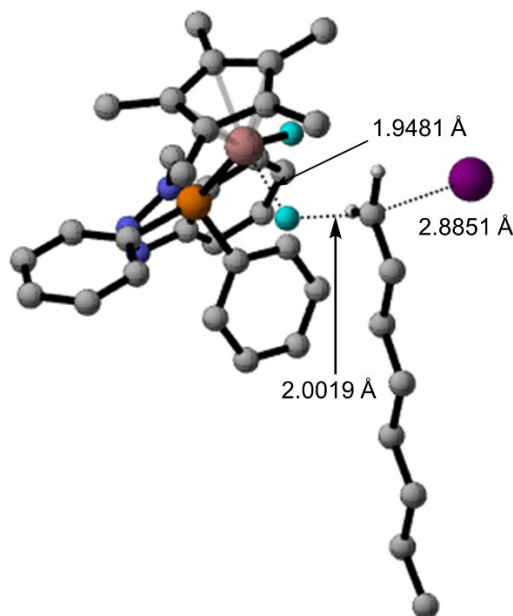

**Figure S63.** DFT-optimized geometrical structure of TS<sub>A-B'</sub>-S<sub>N</sub>2 for 1-iodooctane substrate. Note that non-relevant hydrogen atoms have been omitted for clarity.

**Table S16.** Energy data for the DFT-computed intermediates and transition states for the Co–F assisted S<sub>N</sub>2 fluorination reaction of benzyl bromide and 1-iodooctane computed at the M06-L (SMD = dichloromethane)/def2-TZVP//def2-SVP level of theory in the triplet electronic state. Energies are in a.u.

|                                                          | E (DZ)     | Corr. G(1M) | E (TZ)     | G (1M, TZ) |
|----------------------------------------------------------|------------|-------------|------------|------------|
| <sup>3</sup> A <sub>Co-F</sub>                           | -3210.3682 | 0.4679      | -3212.2674 | -3211.7996 |
| <sup>3</sup> TS <sub>A-B</sub> - S <sub>N</sub> 2 (BnBr) | -6054.8489 | 0.5762      | -6057.3447 | -6056.7684 |
| <sup>3</sup> TS <sub>A-B</sub> - S <sub>N</sub> 2 (1-I)  | -3823.0630 | 0.6792      | -3825.3002 | -3824.6210 |
| <sup>3</sup> B' <sub>Co-Br</sub>                         | -5684.3888 | 0.4667      | -5686.4792 | -5686.0124 |
| <sup>3</sup> B' <sub>Co-I</sub>                          | -3408.5099 | 0.4647      | -3410.2968 | -3409.8322 |

**Table S17.** Cartesian coordinates.

**Structures optimized at the M06-L (SMD = dichloromethane)/def2-SVP level of theory**

**model-3 N3-coordinated**

|    |             |             |             |
|----|-------------|-------------|-------------|
| 71 |             |             |             |
| C  | -3.06186800 | 0.72711500  | 0.43734200  |
| P  | -1.28060300 | 0.84219900  | 0.84771500  |
| C  | -1.27379700 | 1.24968400  | 2.62401300  |
| C  | -4.02746900 | 1.34849100  | 1.24373000  |
| C  | -3.48148300 | 0.00648300  | -0.68820000 |
| C  | -0.76884800 | 2.42782400  | 0.08399000  |
| C  | -5.38173400 | 1.24201300  | 0.92981000  |
| H  | -3.73491400 | 1.92062300  | 2.12672400  |
| C  | -4.83576300 | -0.09209600 | -1.00359900 |
| H  | -2.73901100 | -0.48550200 | -1.32208900 |
| C  | 0.13724400  | 3.27746300  | 0.73600600  |
| C  | -1.28017000 | 2.81299900  | -1.16412900 |
| H  | -6.12232300 | 1.72757300  | 1.56969400  |
| C  | -5.78988400 | 0.52121700  | -0.19251800 |
| H  | -5.14435100 | -0.65903500 | -1.88532300 |
| H  | 0.52289400  | 3.01891800  | 1.72377300  |
| C  | 0.54274300  | 4.47101200  | 0.13934600  |
| H  | -2.00447300 | 2.17703700  | -1.67934700 |
| C  | -0.87912200 | 4.01012200  | -1.75335600 |
| H  | -6.85215300 | 0.43858800  | -0.43434500 |
| H  | 1.24786700  | 5.12283600  | 0.66138400  |
| C  | 0.04060100  | 4.83752200  | -1.10875400 |
| H  | -1.29022300 | 4.29732000  | -2.72383500 |
| H  | 0.35707300  | 5.77398100  | -1.57402400 |
| Co | 0.00163000  | -0.99618500 | 0.28521400  |
| C  | -0.99488300 | -2.81007800 | 0.01390500  |
| C  | 0.43543300  | -3.02063000 | -0.07637400 |
| C  | -1.28557600 | -2.29200400 | 1.31015500  |
| C  | 1.00792800  | -2.61615800 | 1.15876800  |
| C  | -0.03741900 | -2.10514200 | 2.00630900  |
| C  | -1.98370900 | -3.26511600 | -0.99262200 |
| H  | -2.96036200 | -2.78015600 | -0.87229500 |
| H  | -1.63756300 | -3.10013100 | -2.02162500 |
| H  | -2.14842400 | -4.34930800 | -0.87844700 |
| C  | -2.63678000 | -2.14011600 | 1.90078000  |
| H  | -2.87602500 | -3.06037400 | 2.45871800  |
| H  | -2.70781100 | -1.31633000 | 2.62230400  |
| H  | -3.42198900 | -2.01127300 | 1.14646900  |
| C  | 1.12782500  | -3.70355100 | -1.19532600 |

|   |             |             |             |
|---|-------------|-------------|-------------|
| H | 2.21377100  | -3.54844900 | -1.17251100 |
| H | 0.95655300  | -4.79041200 | -1.12851600 |
| H | 0.75203200  | -3.38122500 | -2.17577400 |
| C | 2.43109100  | -2.71444900 | 1.55757600  |
| H | 2.73818700  | -1.88640900 | 2.21117000  |
| H | 2.58028300  | -3.64041100 | 2.13618200  |
| H | 3.11469600  | -2.75878800 | 0.70062300  |
| C | 0.14851900  | -1.69828300 | 3.42156300  |
| H | 0.44640800  | -2.56812900 | 4.02904600  |
| H | 0.94460600  | -0.94859000 | 3.53845500  |
| H | -0.77031300 | -1.29648100 | 3.86444600  |
| I | -0.07235700 | -0.37461200 | -2.32905300 |
| H | -1.67528300 | 2.25781600  | 2.79387300  |
| H | -0.24998200 | 1.21118900  | 3.01267200  |
| H | -1.88588800 | 0.53143000  | 3.18257400  |
| N | 1.67804000  | 0.03852900  | 0.54168000  |
| N | 1.77258500  | 0.80463300  | 1.59172300  |
| C | 2.87691200  | 0.03832600  | -0.13473100 |
| N | 2.98988700  | 1.33394400  | 1.62908800  |
| C | 3.73631600  | 0.90173800  | 0.57185100  |
| C | 3.33987000  | -0.65654600 | -1.26464200 |
| C | 3.35615700  | 2.26613300  | 2.66695900  |
| C | 5.05849400  | 1.14779600  | 0.18012100  |
| H | 2.69701700  | -1.35001600 | -1.80621000 |
| C | 4.64832200  | -0.42224500 | -1.65006800 |
| H | 2.57341100  | 2.26008600  | 3.43098800  |
| H | 4.30723300  | 1.96274600  | 3.11968500  |
| H | 3.46055500  | 3.27771200  | 2.25317100  |
| C | 5.49110100  | 0.47118900  | -0.94692600 |
| H | 5.70471500  | 1.82816300  | 0.73620100  |
| H | 5.04650200  | -0.94223400 | -2.52368700 |
| H | 6.51331800  | 0.62167600  | -1.30010400 |

**model-3 N2-coordinated**

|    |             |             |             |
|----|-------------|-------------|-------------|
| 71 |             |             |             |
| C  | 3.85883200  | 0.00632000  | -0.08875900 |
| C  | -2.78630100 | 1.28793700  | 0.71945400  |
| N  | 1.70500800  | -0.35551300 | 0.23668700  |
| N  | 2.77022800  | -0.67152100 | -0.54314500 |
| P  | -0.97395300 | 1.04488900  | 0.85936000  |
| C  | 3.38665600  | 0.73661300  | 1.01934700  |

|    |             |             |             |    |             |             |             |
|----|-------------|-------------|-------------|----|-------------|-------------|-------------|
| C  | 5.19340500  | 0.06108700  | -0.51305200 | C  | -4.25137400 | -1.27074000 | -0.99614500 |
| C  | -0.62633400 | 1.47528100  | 2.59411100  | C  | -0.80919800 | -0.38352500 | -1.55098500 |
| C  | -3.49208600 | 2.00000100  | 1.70149100  | H  | -0.77988300 | 0.42998800  | -2.28855500 |
| C  | -3.49625000 | 0.74471400  | -0.35988600 | H  | -0.17731000 | -1.20781600 | -1.90823400 |
| N  | 2.06105600  | 0.46777400  | 1.17133800  | C  | -0.31422700 | 1.90220100  | 0.32162800  |
| C  | -0.27810700 | 2.47670500  | -0.04957100 | N  | -2.32248900 | -2.22453800 | -1.20005900 |
| C  | 4.24610500  | 1.57277300  | 1.75342800  | N  | -3.56685900 | -2.45869400 | -0.95527100 |
| C  | 6.02684500  | 0.88634300  | 0.22349800  | P  | -0.00879500 | 0.13020400  | 0.05942600  |
| H  | 5.55123700  | -0.50500800 | -1.37402800 | C  | -3.33572700 | -0.24029800 | -1.29683600 |
| C  | -4.87411300 | 2.15660700  | 1.60406600  | C  | -5.60668900 | -0.98280600 | -0.77146900 |
| H  | -2.97373400 | 2.43770900  | 2.55661800  | C  | -0.05222600 | 2.39257200  | 1.61289200  |
| C  | -4.87691000 | 0.90938500  | -0.45846900 | C  | -0.66148400 | 2.80719600  | -0.68941100 |
| H  | -2.96342900 | 0.18206600  | -1.13122000 | N  | -2.14570700 | -0.89595600 | -1.42749500 |
| C  | 0.82275800  | 3.17973800  | 0.46212900  | C  | -1.06921900 | -0.68789300 | 1.30014800  |
| C  | -0.84671100 | 2.89738100  | -1.26108200 | C  | -3.72609300 | 1.10115300  | -1.39154800 |
| H  | 3.88310300  | 2.14262500  | 2.61038900  | C  | -5.99414400 | 0.34467400  | -0.85261500 |
| C  | 5.56318600  | 1.63101900  | 1.33629700  | H  | -6.31525700 | -1.77900400 | -0.53625600 |
| H  | 7.07725400  | 0.97019900  | -0.06315400 | C  | -0.16774700 | 3.75136400  | 1.88959900  |
| H  | -5.40814200 | 2.70992600  | 2.38012100  | H  | 0.25554700  | 1.69972900  | 2.40328400  |
| C  | -5.57122400 | 1.61095500  | 0.52648800  | C  | -0.77144400 | 4.17062400  | -0.40967000 |
| H  | -5.41147100 | 0.47808400  | -1.30828800 | H  | -0.84731800 | 2.45918200  | -1.70867600 |
| H  | 1.26820600  | 2.88992500  | 1.41498900  | C  | -2.24092800 | -0.06669700 | 1.75939400  |
| C  | 1.35704100  | 4.26244800  | -0.23530700 | C  | -0.76665100 | -1.99056100 | 1.72071500  |
| H  | -1.71775500 | 2.37809200  | -1.66841300 | H  | -3.01818400 | 1.89696900  | -1.62628500 |
| C  | -0.31474700 | 3.98459000  | -1.95122500 | C  | -5.06752000 | 1.36788400  | -1.15987100 |
| H  | 6.27030300  | 2.26627200  | 1.87350600  | H  | -7.03833600 | 0.61402800  | -0.67893100 |
| H  | -6.65449000 | 1.73352100  | 0.45521600  | H  | 0.03262000  | 4.11619700  | 2.89977400  |
| H  | 2.21626600  | 4.79676300  | 0.17787400  | C  | -0.53051800 | 4.64450900  | 0.87891800  |
| C  | 0.79342000  | 4.66470400  | -1.44544000 | H  | -1.04999000 | 4.86388600  | -1.20684800 |
| H  | -0.77269900 | 4.30270300  | -2.89059200 | H  | -2.49407700 | 0.94760100  | 1.43791200  |
| H  | 1.21136700  | 5.51501600  | -1.98945300 | C  | -3.10075700 | -0.74158100 | 2.62520800  |
| Co | -0.17959600 | -1.05191900 | 0.21929500  | H  | 0.14357800  | -2.45885400 | 1.34728500  |
| C  | -1.56337700 | -2.61438300 | 0.19830400  | C  | -1.63127100 | -2.65721600 | 2.58638900  |
| C  | -0.24361800 | -3.15250300 | -0.04385100 | H  | -5.42025000 | 2.40026200  | -1.21660900 |
| C  | -1.56341200 | -1.99443800 | 1.48308700  | H  | -0.62021000 | 5.71134100  | 1.09656100  |
| C  | 0.56514300  | -2.82264900 | 1.07697100  | H  | -4.01382300 | -0.25060900 | 2.97141800  |
| C  | -0.22357300 | -2.05706300 | 2.00801200  | C  | -2.79805700 | -2.03897600 | 3.03784600  |
| C  | -2.75340900 | -2.86890100 | -0.64708500 | H  | -1.39087500 | -3.67316900 | 2.90935800  |
| H  | -3.50449900 | -2.07186800 | -0.57199900 | H  | -3.47315300 | -2.56908700 | 3.71448800  |
| H  | -2.48983400 | -2.99642300 | -1.70447500 | Co | 2.12486200  | -0.57395900 | 0.03911800  |
| H  | -3.24266100 | -3.80014200 | -0.31633900 | C  | 3.25185200  | 1.11355200  | -0.24788400 |
| C  | -2.77202200 | -1.54691700 | 2.21404100  | C  | 4.02171000  | 0.12352500  | 0.43649900  |
| H  | -3.12775300 | -2.38678700 | 2.83332600  | C  | 2.85053800  | 0.55144600  | -1.52377900 |
| H  | -2.58723200 | -0.71232600 | 2.90124100  | C  | 4.06025300  | -1.06181300 | -0.36560400 |
| H  | -3.59688700 | -1.27328500 | 1.54494200  | C  | 3.36317400  | -0.77390300 | -1.59687900 |
| C  | 0.11224000  | -4.03226300 | -1.18409100 | C  | 3.05033500  | 2.51567600  | 0.19472700  |
| H  | 1.18113100  | -4.27809200 | -1.20654000 | H  | 2.18232700  | 2.98573800  | -0.28654400 |
| H  | -0.43671900 | -4.98371400 | -1.10078400 | H  | 2.91914700  | 2.59193700  | 1.28272500  |
| H  | -0.16433700 | -3.59275100 | -2.15340900 | H  | 3.92993900  | 3.12901000  | -0.06293100 |
| C  | 1.97525400  | -3.21335400 | 1.30937800  | C  | 2.12561100  | 1.28511400  | -2.59184500 |
| H  | 2.54089700  | -2.43667900 | 1.84215600  | H  | 2.83217300  | 1.87016700  | -3.20292600 |
| H  | 2.00044600  | -4.10914400 | 1.95060400  | H  | 1.59135600  | 0.61266400  | -3.27543500 |
| H  | 2.50797600  | -3.47194100 | 0.38595500  | H  | 1.40284900  | 2.00388800  | -2.18039200 |
| C  | 0.23632400  | -1.64571100 | 3.35780900  | C  | 4.57555000  | 0.27435900  | 1.80040700  |
| H  | 0.45946900  | -2.53610500 | 3.96720000  | H  | 4.73852600  | -0.69369400 | 2.28811800  |
| H  | 1.16185300  | -1.05288800 | 3.31949000  | H  | 5.54488800  | 0.79667300  | 1.76389900  |
| H  | -0.52033200 | -1.06476700 | 3.89715300  | H  | 3.90934300  | 0.86542900  | 2.44121100  |
| I  | -0.53065000 | -0.52807400 | -2.39401700 | C  | 4.66600600  | -2.36596200 | -0.00366500 |
| H  | -0.80728800 | 2.54426800  | 2.76994700  | H  | 5.71626300  | -2.43793300 | -0.32949900 |
| H  | 0.42052100  | 1.25098000  | 2.82497000  | H  | 4.64825300  | -2.53021700 | 1.08203900  |
| C  | 2.73557400  | -1.60546300 | -1.63918700 | H  | 4.12300200  | -3.19822900 | -0.47086300 |
| H  | 1.81297900  | -2.18669700 | -1.58269100 | C  | 3.14045300  | -1.76006300 | -2.67955000 |
| H  | 2.76793400  | -1.07682000 | -2.60075000 | H  | 4.09863200  | -2.11265300 | -3.09012000 |
| H  | 3.60122800  | -2.27551500 | -1.56265100 | H  | 2.60401400  | -2.63622100 | -2.28746700 |
| H  | -1.26765700 | 0.89828700  | 3.27105800  | H  | 2.55385600  | -1.34538000 | -3.50862000 |
|    |             |             |             | F  | 1.94110900  | -0.93222600 | 1.87173400  |
|    |             |             |             | F  | 1.29857400  | -2.22850200 | -0.41177300 |

**TS<sub>A-B</sub>**

|    |             |             |             |
|----|-------------|-------------|-------------|
| 81 |             |             |             |
| C  | 4.60437100  | 0.11301800  | -1.73752400 |
| C  | 1.51314800  | -1.67961300 | -1.27801700 |
| H  | 1.75178000  | -2.72500900 | -1.04145900 |
| H  | 0.87117500  | -1.65520700 | -2.16676300 |
| C  | 0.87207000  | -1.77133300 | 1.62561200  |
| N  | 2.73473600  | -0.22734800 | -2.76799000 |
| N  | 3.85465100  | 0.40577200  | -2.84880200 |
| P  | 0.46197200  | -0.91044900 | 0.07320600  |
| C  | 3.86834800  | -0.77798300 | -0.92853500 |
| C  | 5.87253100  | 0.56391400  | -1.33775700 |
| C  | 0.39931300  | -1.21596600 | 2.82728800  |
| C  | 1.54207500  | -3.00187100 | 1.67048100  |
| N  | 2.70867200  | -0.96219400 | -1.62354800 |
| C  | 1.20622000  | 0.75034500  | 0.20905100  |
| C  | 4.35835400  | -1.25628000 | 0.29296900  |
| C  | 6.35729500  | 0.09803800  | -0.12672800 |
| H  | 6.44109900  | 1.25689400  | -1.96053500 |
| C  | 0.61551000  | -1.86494000 | 4.04057700  |
| H  | -0.14596700 | -0.26954200 | 2.80779800  |
| C  | 1.75186000  | -3.65126300 | 2.88707900  |
| H  | 1.90688500  | -3.47808600 | 0.75744100  |
| C  | 2.05897400  | 1.11985700  | 1.25951000  |
| C  | 1.02639800  | 1.62263400  | -0.87543600 |
| H  | 3.78349600  | -1.93904900 | 0.92066800  |
| C  | 5.61126600  | -0.79876900 | 0.67302600  |
| H  | 7.33787700  | 0.42705300  | 0.22431300  |
| H  | 0.24679500  | -1.41443800 | 4.96503500  |
| C  | 1.29127400  | -3.08546600 | 4.07468700  |
| H  | 2.27856800  | -4.60823500 | 2.90184600  |
| H  | 2.22867100  | 0.44758400  | 2.10381300  |
| C  | 2.72723500  | 2.34291400  | 1.21914900  |
| H  | 0.35784700  | 1.32677700  | -1.68737700 |
| C  | 1.71671800  | 2.83177000  | -0.91825900 |
| H  | 6.03481800  | -1.13942700 | 1.62070700  |
| H  | 1.45669900  | -3.59650400 | 5.02599900  |
| H  | 3.39122700  | 2.62054300  | 2.04162800  |
| C  | 2.56622300  | 3.19504100  | 0.12619700  |
| H  | 1.58423100  | 3.49648700  | -1.77557000 |
| H  | 3.10022600  | 4.14822600  | 0.09210600  |
| Co | -1.67074300 | -0.93128500 | -0.77499900 |
| C  | -3.28783100 | -1.68251000 | 0.26822400  |
| C  | -3.69601000 | -1.27454000 | -1.06463900 |
| C  | -2.30390600 | -2.69743300 | 0.13210400  |
| C  | -2.93485400 | -2.01591500 | -2.00220700 |
| C  | -2.00817000 | -2.84886900 | -1.27241900 |
| C  | -3.89554500 | -1.22587800 | 1.53898500  |
| H  | -3.22190000 | -1.37332800 | 2.39267400  |
| H  | -4.17433000 | -0.16446500 | 1.50545900  |
| H  | -4.81276400 | -1.80335300 | 1.74316100  |
| C  | -1.77561900 | -3.53769200 | 1.22940300  |
| H  | -2.50982600 | -4.33328600 | 1.43848300  |
| H  | -0.83456700 | -4.03702100 | 0.97182600  |
| H  | -1.63580100 | -2.98516400 | 2.16704500  |
| C  | -4.71536700 | -0.24502600 | -1.36263500 |
| H  | -4.61723700 | 0.14802100  | -2.38228400 |
| H  | -5.72704400 | -0.67253900 | -1.27100600 |
| H  | -4.65008500 | 0.59641500  | -0.65940900 |
| C  | -2.98597800 | -1.89044900 | -3.47421500 |
| H  | -3.69469000 | -2.62432100 | -3.89011800 |
| H  | -3.32064900 | -0.89564700 | -3.79194400 |
| H  | -2.00869300 | -2.08179000 | -3.93207400 |
| C  | -1.06418000 | -3.82330100 | -1.87084400 |
| H  | -1.58468300 | -4.75946300 | -2.13108400 |
| H  | -0.61279800 | -3.44343500 | -2.79711600 |
| H  | -0.25337500 | -4.08975800 | -1.17947700 |
| F  | -0.79586100 | -0.32642100 | -2.33254700 |

|    |             |            |             |
|----|-------------|------------|-------------|
| F  | -2.02901300 | 0.99765200 | -0.40185400 |
| Cl | -4.06848500 | 2.35927200 | 1.15557800  |
| C  | -1.96122500 | 1.87396900 | 1.10115700  |
| O  | -1.63665200 | 1.13785600 | 1.97177900  |
| C  | -1.39437300 | 3.17508300 | 0.68553200  |
| C  | -0.55383900 | 3.81507100 | 1.60146900  |
| C  | -1.69532500 | 3.78650700 | -0.53761300 |
| C  | -0.02419200 | 5.06972600 | 1.29899300  |
| H  | -0.32367700 | 3.32799100 | 2.55204700  |
| C  | -1.15226000 | 5.02957300 | -0.83789800 |
| H  | -2.35930000 | 3.27991900 | -1.23896300 |
| C  | -0.31929400 | 5.67729000 | 0.08088000  |
| H  | 0.62966600  | 5.56815900 | 2.01899700  |
| H  | -1.38270900 | 5.50414300 | -1.79471000 |
| H  | 0.09716100  | 6.65918200 | -0.15721200 |

**TS<sub>A-B</sub>-meta**

|    |             |             |             |
|----|-------------|-------------|-------------|
| 81 |             |             |             |
| C  | 1.03382300  | 0.67011200  | -1.05968500 |
| H  | 0.20451400  | 0.43981900  | -1.74220200 |
| H  | 1.09558500  | 1.76910800  | -1.01554300 |
| C  | 1.62188900  | -1.28885700 | 1.06937700  |
| P  | 0.48456400  | 0.06024000  | 0.61723600  |
| C  | 2.14847200  | -1.38625200 | 2.36451200  |
| C  | 1.92878400  | -2.28686300 | 0.13239300  |
| C  | 0.86059100  | 1.42532000  | 1.77497600  |
| C  | 2.98825200  | -2.44552200 | 2.70413500  |
| H  | 1.91046900  | -0.62795000 | 3.11470200  |
| C  | 2.78471700  | -3.33237500 | 0.46946700  |
| H  | 1.50141300  | -2.25069100 | -0.87339300 |
| C  | 0.20848800  | 1.41989000  | 3.01941100  |
| C  | 1.72725100  | 2.48474000  | 1.46947700  |
| H  | 3.39247000  | -2.50854900 | 3.71716000  |
| C  | 3.31795700  | -3.41413500 | 1.75613400  |
| H  | 3.02819500  | -4.09169300 | -0.27781100 |
| H  | -0.48486700 | 0.60608000  | 3.24482500  |
| C  | 0.43515300  | 2.44171200  | 3.93860100  |
| H  | 2.23918600  | 2.53708400  | 0.50566600  |
| C  | 1.94723400  | 3.50780400  | 2.39212800  |
| H  | 3.98569600  | -4.23707200 | 2.02168300  |
| H  | -0.07972400 | 2.42275600  | 4.90212600  |
| C  | 1.30261300  | 3.48959900  | 3.62792400  |
| H  | 2.62349900  | 4.32704300  | 2.13565000  |
| H  | 1.47309100  | 4.29416600  | 4.34728900  |
| Co | -1.67673500 | -0.61221700 | 0.65391800  |
| C  | -3.17605100 | -2.12107300 | 0.65881800  |
| C  | -3.94691200 | -1.67071600 | -0.44466600 |
| C  | -1.91757200 | -2.60167100 | 0.12785300  |
| C  | -3.25245500 | -1.93809800 | -1.66717200 |
| C  | -2.02174100 | -2.48646000 | -1.33429500 |
| C  | -3.75316600 | -2.40572100 | 2.00523100  |
| H  | -2.97674900 | -2.65034600 | 2.73724800  |
| H  | -4.31557700 | -1.54696700 | 2.40377300  |
| H  | -4.45966700 | -3.25291900 | 1.96368900  |
| C  | -1.08115600 | -3.63905800 | 0.80448300  |
| H  | -1.63785800 | -4.58728000 | 0.90657100  |
| H  | -0.16897900 | -3.87113300 | 0.23940100  |
| H  | -0.78200300 | -3.32383700 | 1.81254500  |
| C  | -5.27420000 | -1.02999600 | -0.32749300 |
| H  | -5.64183600 | -0.62876300 | -1.27963400 |
| H  | -6.02271900 | -1.74963600 | 0.04607900  |
| H  | -5.25603900 | -0.21034800 | 0.40707100  |
| C  | -3.69977800 | -1.48292800 | -3.00941100 |
| H  | -3.02994500 | -1.83238700 | -3.80643900 |
| H  | -4.71278100 | -1.83573200 | -3.25832000 |
| H  | -3.72964700 | -0.38257100 | -3.07337300 |
| C  | -0.91729100 | -2.76859400 | -2.27919800 |
| H  | -1.29143200 | -3.08022900 | -3.26429700 |

|    |             |             |             |
|----|-------------|-------------|-------------|
| H  | -0.29896300 | -1.87009000 | -2.46221800 |
| H  | -0.23835300 | -3.55253400 | -1.91397400 |
| F  | -1.25808400 | -1.14230600 | 2.38256500  |
| F  | -1.92893900 | 0.26604000  | -1.08057300 |
| C  | -2.81670700 | 1.91506900  | -0.88292700 |
| C  | -1.69022900 | 2.79639200  | -1.20594500 |
| C  | -1.34817700 | 2.83614700  | -2.56943900 |
| C  | -1.01224200 | 3.59573100  | -0.28299500 |
| C  | -0.32300300 | 3.67058800  | -2.99713200 |
| H  | -1.87990600 | 2.20015700  | -3.28073200 |
| C  | -0.00039100 | 4.44510300  | -0.73055000 |
| H  | -1.27978800 | 3.55804500  | 0.77388900  |
| C  | 0.35089100  | 4.47969400  | -2.07878900 |
| H  | -0.05137500 | 3.69163700  | -4.05464700 |
| H  | 0.52017000  | 5.08093600  | -0.01106000 |
| H  | 1.15125700  | 5.14094500  | -2.41849500 |
| O  | -3.90727900 | 1.78428200  | -1.27647400 |
| Cl | -2.70389500 | 1.45998700  | 1.34104900  |
| N  | 2.21567900  | 0.11315000  | -1.66367600 |
| N  | 2.08338300  | -0.50407200 | -2.87025800 |
| C  | 3.51453400  | 0.03370100  | -1.24609200 |
| N  | 3.22437200  | -0.96677200 | -3.24865800 |
| C  | 4.15583000  | -0.67057500 | -2.28789800 |
| C  | 4.20078500  | 0.42559300  | -0.08854300 |
| C  | 5.52049700  | -0.99251100 | -2.21069900 |
| H  | 3.70363200  | 0.93736700  | 0.73628400  |
| C  | 5.54528700  | 0.09368300  | -0.02579500 |
| C  | 6.19940200  | -0.60072400 | -1.07014000 |
| H  | 6.01057200  | -1.53878600 | -3.01852400 |
| H  | 6.11654500  | 0.37047900  | 0.86330400  |
| H  | 7.26064900  | -0.83612700 | -0.96477300 |

### B<sub>Co-Cl</sub>

67

|    |             |             |             |
|----|-------------|-------------|-------------|
| C  | -0.88002000 | -0.43924600 | -1.57360100 |
| H  | -0.88615700 | 0.30439500  | -2.38323300 |
| H  | -0.23465200 | -1.27452600 | -1.87163400 |
| C  | -0.18402000 | 2.05850700  | -0.06727900 |
| P  | -0.06474900 | 0.24443800  | -0.03442100 |
| C  | 0.37532800  | 2.72109500  | 1.03885200  |
| C  | -0.70437200 | 2.81512100  | -1.12369100 |
| C  | -1.23146400 | -0.25625300 | 1.28262800  |
| C  | 0.39151500  | 4.11218700  | 1.09236100  |
| H  | 0.80350100  | 2.13162600  | 1.85777300  |
| C  | -0.68239100 | 4.20951200  | -1.06835300 |
| H  | -1.12191000 | 2.32799200  | -2.00799300 |
| C  | -2.16022900 | 0.64651200  | 1.81733400  |
| C  | -1.25003900 | -1.59518400 | 1.70163700  |
| H  | 0.82471000  | 4.61524500  | 1.96014400  |
| C  | -0.13734000 | 4.85979600  | 0.03789800  |
| H  | -1.09237400 | 4.78910100  | -1.89881300 |
| H  | -2.16722900 | 1.69275500  | 1.50108700  |
| C  | -3.10110200 | 0.21414200  | 2.75312200  |
| H  | -0.51274600 | -2.28346400 | 1.28403300  |
| C  | -2.19691500 | -2.02001700 | 2.62988700  |
| H  | -0.12140900 | 5.95151200  | 0.07797300  |
| H  | -3.82267000 | 0.92697800  | 3.16003300  |
| C  | -3.12452100 | -1.11927500 | 3.15719900  |
| H  | -2.20792800 | -3.06599500 | 2.94633200  |
| H  | -3.86490600 | -1.45811300 | 3.88618000  |
| Co | 2.00781900  | -0.61600300 | 0.07608800  |
| C  | 3.60536500  | 0.66431700  | -0.06415800 |
| C  | 4.09409700  | -0.67760000 | 0.19378700  |
| C  | 2.90188600  | 0.63898700  | -1.30764100 |
| C  | 3.63764900  | -1.51937400 | -0.84702700 |
| C  | 2.85288700  | -0.72133900 | -1.76248800 |
| C  | 3.91038500  | 1.84940500  | 0.77403600  |
| H  | 3.30818700  | 2.72310500  | 0.49332800  |

|    |             |             |             |
|----|-------------|-------------|-------------|
| H  | 3.72485000  | 1.63724900  | 1.83660500  |
| H  | 4.96959200  | 2.13772300  | 0.67688400  |
| C  | 2.37393000  | 1.81091800  | -2.04526200 |
| H  | 3.11654700  | 2.12944900  | -2.79487300 |
| H  | 1.45070300  | 1.58316600  | -2.59580800 |
| H  | 2.18516000  | 2.67392200  | -1.39475500 |
| C  | 4.93876400  | -1.06816300 | 1.34607400  |
| H  | 4.79221800  | -2.11808700 | 1.62921700  |
| H  | 6.00433800  | -0.93988100 | 1.09486200  |
| H  | 4.72798000  | -0.45195500 | 2.22818900  |
| C  | 3.80389500  | -2.98557900 | -0.95989300 |
| H  | 4.32513100  | -3.25296500 | -1.89170300 |
| H  | 4.37300100  | -3.40604400 | -0.12219800 |
| H  | 2.81793700  | -3.47281600 | -0.98305500 |
| C  | 2.24368400  | -1.23059300 | -3.01511100 |
| H  | 3.01384200  | -1.39390900 | -3.78667700 |
| H  | 1.74742700  | -2.19836300 | -2.85490700 |
| H  | 1.51045300  | -0.53205000 | -3.43839900 |
| F  | 1.01522100  | -2.23215000 | -0.10946300 |
| Cl | 1.88374600  | -0.49891300 | 2.38912500  |
| N  | -2.19193500 | -0.99865500 | -1.39235400 |
| C  | -3.39769500 | -0.39830000 | -1.17207300 |
| N  | -2.32657800 | -2.34974300 | -1.30770900 |
| C  | -4.27545500 | -1.48231600 | -0.96007900 |
| C  | -3.83108800 | 0.93271000  | -1.11966500 |
| N  | -3.55635100 | -2.64600100 | -1.06035100 |
| C  | -5.63396700 | -1.26334800 | -0.68242400 |
| C  | -5.17529700 | 1.13040700  | -0.84209500 |
| H  | -3.14973100 | 1.77114500  | -1.27078200 |
| H  | -6.31162400 | -2.10239500 | -0.51505300 |
| C  | -6.06441600 | 0.05183000  | -0.62620000 |
| H  | -5.56026000 | 2.15114600  | -0.78514500 |
| H  | -7.11279300 | 0.26803900  | -0.40939800 |

### Benzoyl chloride

14

|    |             |             |             |
|----|-------------|-------------|-------------|
| C  | 0.12281800  | 0.19921300  | 0.00011500  |
| C  | 0.56474500  | -1.13195800 | 0.00017100  |
| C  | 1.92781600  | -1.40999700 | 0.00011300  |
| C  | 2.85684700  | -0.36875000 | -0.00006300 |
| C  | 2.42358600  | 0.95904700  | -0.00016800 |
| C  | 1.06459200  | 1.24502300  | -0.00009600 |
| H  | -0.15831200 | -1.94818500 | 0.00030800  |
| H  | 2.26708300  | -2.44783000 | 0.00020300  |
| H  | 3.92610200  | -0.59317000 | -0.00012300 |
| H  | 3.15065500  | 1.77387500  | -0.00029900 |
| H  | 0.71160300  | 2.27813600  | -0.00017000 |
| C  | -1.29293200 | 0.60034000  | 0.00018500  |
| O  | -1.72074300 | 1.71180800  | 0.00018300  |
| Cl | -2.47859000 | -0.78322400 | -0.00017200 |

### Benzoyl fluoride

14

|   |             |             |             |
|---|-------------|-------------|-------------|
| C | -0.23791500 | 0.04039500  | 0.00000000  |
| C | 0.42869300  | -1.19407800 | 0.00000100  |
| C | 1.81982200  | -1.22765100 | 0.00000100  |
| C | 2.54817100  | -0.03685000 | 0.00000000  |
| C | 1.88758100  | 1.19420300  | -0.00000100 |
| C | 0.49854300  | 1.23546900  | -0.00000100 |
| H | -0.14524300 | -2.12177600 | 0.00000200  |
| H | 2.33979200  | -2.18790800 | 0.00000200  |
| H | 3.64037100  | -0.06774200 | 0.00000000  |
| H | 2.46060600  | 2.12376500  | -0.00000200 |
| H | -0.03438200 | 2.18865200  | -0.00000100 |
| C | -1.70249700 | 0.13417300  | 0.00000000  |
| O | -2.37800800 | 1.11697000  | 0.00000200  |
| F | -2.29905200 | -1.08274600 | -0.00000200 |

${}^3A_{Co-F}$ 

|    |             |             |             |
|----|-------------|-------------|-------------|
| 67 |             |             |             |
| C  | -4.26198500 | -1.42579700 | -0.99634100 |
| C  | -0.83751300 | -0.48066300 | -1.57371000 |
| H  | -0.80247300 | 0.25972800  | -2.38499300 |
| H  | -0.19055600 | -1.32526000 | -1.84553700 |
| C  | -0.22647200 | 2.00445400  | 0.00413900  |
| N  | -2.33670500 | -2.35540800 | -1.31950900 |
| N  | -3.57609900 | -2.61158600 | -1.07458400 |
| P  | -0.08139200 | 0.19971900  | -0.00785700 |
| C  | -3.35190700 | -0.37158600 | -1.22021500 |
| C  | -5.61279000 | -1.15965100 | -0.72280600 |
| C  | 0.14772900  | 2.63740300  | 1.20280900  |
| C  | -0.56731400 | 2.78790600  | -1.10638600 |
| N  | -2.16434200 | -1.01054600 | -1.42716200 |
| C  | -1.20571600 | -0.38766600 | 1.30018400  |
| C  | -3.73927700 | 0.97374200  | -1.18157300 |
| C  | -5.99933100 | 0.16988800  | -0.67863400 |
| H  | -6.31856500 | -1.97347600 | -0.54738500 |
| C  | 0.14140100  | 4.02568900  | 1.29569300  |
| H  | 0.45996400  | 2.02492200  | 2.05469600  |
| C  | -0.56040600 | 4.18034500  | -1.01038500 |
| H  | -0.84527900 | 2.32440300  | -2.05633700 |
| C  | -2.20643500 | 0.43089700  | 1.84213600  |
| C  | -1.10276500 | -1.72393000 | 1.71443200  |
| H  | -3.02947800 | 1.78693100  | -1.34408200 |
| C  | -5.07619600 | 1.21753000  | -0.90425100 |
| H  | -7.04007900 | 0.42218700  | -0.46386400 |
| H  | 0.42562100  | 4.50640600  | 2.23466300  |
| C  | -0.21344400 | 4.80051300  | 0.18921300  |
| H  | -0.83226500 | 4.78180400  | -1.88092100 |
| H  | -2.30528700 | 1.47230000  | 1.52491600  |
| C  | -3.09742600 | -0.08348600 | 2.78356000  |
| H  | -0.32027200 | -2.35176900 | 1.28091100  |
| C  | -2.00098900 | -2.23099800 | 2.65050000  |
| H  | -5.42832400 | 2.25055000  | -0.85682200 |
| H  | -0.21387300 | 5.89062800  | 0.26115500  |
| H  | -3.87703800 | 0.56128700  | 3.19675500  |
| C  | -2.99851200 | -1.41490500 | 3.18626300  |
| H  | -1.91895800 | -3.27412800 | 2.96518400  |
| H  | -3.70024800 | -1.81736700 | 3.92098600  |
| Co | 1.99673800  | -0.62350200 | 0.24164400  |
| C  | 3.38696400  | 0.89591500  | -0.33232800 |
| C  | 4.09982800  | -0.00008100 | 0.50051000  |
| C  | 2.98503900  | 0.16910000  | -1.53900600 |
| C  | 4.04294800  | -1.29260600 | -0.11933900 |
| C  | 3.45664700  | -1.15468100 | -1.42839700 |
| C  | 3.23661300  | 2.35473400  | -0.10573000 |
| H  | 2.41394600  | 2.79005900  | -0.68897800 |
| H  | 3.06182900  | 2.58500600  | 0.95518000  |
| H  | 4.15352600  | 2.89378500  | -0.39945700 |
| C  | 2.33305900  | 0.79858500  | -2.71542600 |
| H  | 3.06854600  | 1.36300200  | -3.31230400 |
| H  | 1.87348900  | 0.06019800  | -3.38518100 |
| H  | 1.55932800  | 1.52336700  | -2.42181400 |
| C  | 4.66342600  | 0.33117600  | 1.83228500  |
| H  | 5.16193500  | -0.53024000 | 2.29435300  |
| H  | 5.40340200  | 1.14349400  | 1.76501600  |
| H  | 3.86836600  | 0.66027700  | 2.51703500  |
| C  | 4.56434800  | -2.56607100 | 0.43188800  |
| H  | 5.56174900  | -2.80150600 | 0.02574000  |
| H  | 4.65441400  | -2.53729200 | 1.52517300  |
| H  | 3.90884100  | -3.40843400 | 0.16986300  |
| C  | 3.23623000  | -2.27696400 | -2.37134800 |
| H  | 4.18484800  | -2.75518700 | -2.66133300 |
| H  | 2.60802800  | -3.05329600 | -1.90916800 |
| H  | 2.73719000  | -1.95019000 | -3.29279300 |

|   |            |             |             |
|---|------------|-------------|-------------|
| F | 1.72546200 | -0.25327300 | 2.10638700  |
| F | 1.18033000 | -2.31266000 | -0.15803500 |

 ${}^3TS_{A-B}$ 

|    |             |             |             |
|----|-------------|-------------|-------------|
| 81 |             |             |             |
| C  | 4.68696100  | 0.08263200  | -1.69518200 |
| C  | 1.57041700  | -1.66730900 | -1.25216200 |
| H  | 1.78049100  | -2.71369000 | -0.99401300 |
| H  | 0.94275800  | -1.65103300 | -2.15118100 |
| C  | 0.95727200  | -1.67170700 | 1.64982900  |
| N  | 2.81697300  | -0.23294100 | -2.73202800 |
| N  | 3.94226100  | 0.39029800  | -2.80581100 |
| P  | 0.52775300  | -0.85350000 | 0.08003400  |
| C  | 3.94194800  | -0.80808600 | -0.89382300 |
| C  | 5.95693400  | 0.52247900  | -1.29016200 |
| C  | 0.55598400  | -1.06679900 | 2.85381400  |
| C  | 1.57057300  | -2.93294200 | 1.70308700  |
| N  | 2.78281800  | -0.97857100 | -1.59412000 |
| C  | 1.23556300  | 0.82268000  | 0.12246800  |
| C  | 4.42644800  | -1.29734400 | 0.32562300  |
| C  | 6.43530000  | 0.04728800  | -0.08017600 |
| H  | 6.53149300  | 1.21488500  | -1.90801200 |
| C  | 0.78545300  | -1.69899000 | 4.07405000  |
| H  | 0.05568700  | -0.09696000 | 2.83081900  |
| C  | 1.79548800  | -3.56234200 | 2.92649500  |
| H  | 1.87840500  | -3.44950000 | 0.79162500  |
| C  | 2.13791300  | 1.25263100  | 1.10522500  |
| C  | 0.95779400  | 1.64948300  | -0.97708300 |
| H  | 3.84864100  | -1.98288700 | 0.94733500  |
| C  | 5.68125200  | -0.84940300 | 0.71173000  |
| H  | 7.41698200  | 0.36795100  | 0.27541500  |
| H  | 0.47270300  | -1.20943800 | 4.99926100  |
| C  | 1.40604400  | -2.94784800 | 4.11552300  |
| H  | 2.27821500  | -4.54216100 | 2.94564600  |
| H  | 2.37684800  | 0.61465400  | 1.95998900  |
| C  | 2.76142300  | 2.49361200  | 0.98170500  |
| H  | 0.25210600  | 1.30756100  | -1.73883800 |
| C  | 1.60343600  | 2.87719200  | -1.10403600 |
| H  | 6.10016200  | -1.19930300 | 1.65809700  |
| H  | 1.58260400  | -3.44370200 | 5.07285900  |
| H  | 3.46562200  | 2.82213800  | 1.75016300  |
| C  | 2.50454600  | 3.30062000  | -0.12751900 |
| H  | 1.39430600  | 3.50810700  | -1.97147500 |
| H  | 3.00413000  | 4.26773400  | -0.22712200 |
| Co | -1.62902900 | -0.95477000 | -0.83569200 |
| C  | -3.18495600 | -1.83054400 | 0.39438000  |
| C  | -3.77719000 | -1.32071400 | -0.78484100 |
| C  | -2.25504600 | -2.88433600 | 0.00652500  |
| C  | -3.16569100 | -1.99924800 | -1.90190300 |
| C  | -2.28200700 | -3.01532900 | -1.40469900 |
| C  | -3.48289800 | -1.43973700 | 1.79305000  |
| H  | -2.58918600 | -1.49347600 | 2.43014800  |
| H  | -3.87323400 | -0.41544800 | 1.85764700  |
| H  | -4.23123400 | -2.11647700 | 2.23850100  |
| C  | -1.56272000 | -3.77877500 | 0.95996500  |
| H  | -2.23186600 | -4.61629600 | 1.21991300  |
| H  | -0.65003200 | -4.22043000 | 0.54040500  |
| H  | -1.31083100 | -3.27745900 | 1.90337700  |
| C  | -4.80910900 | -0.26593000 | -0.90399300 |
| H  | -4.55329200 | 0.46602200  | -1.68311600 |
| H  | -5.77991400 | -0.70333800 | -1.18858800 |
| H  | -4.93871200 | 0.28813000  | 0.03185200  |
| C  | -3.46615600 | -1.74182800 | -3.32608200 |
| H  | -4.35460300 | -2.31535000 | -3.63813100 |
| H  | -3.68945600 | -0.68325600 | -3.51187700 |
| H  | -2.63849000 | -2.03890800 | -3.98158100 |
| C  | -1.47712400 | -3.93973700 | -2.24112800 |
| H  | -2.10872800 | -4.71834200 | -2.69830300 |



|    |             |             |             |
|----|-------------|-------------|-------------|
| H  | -0.98391300 | -3.41530100 | -3.07305600 |
| H  | -0.70274900 | -4.45609600 | -1.65915000 |
| F  | -0.82753000 | -0.47391600 | -2.45692300 |
| F  | -2.12374800 | 0.97737900  | -0.23738700 |
| Cl | -3.98162600 | 2.25931000  | 1.51734600  |
| C  | -1.93293800 | 1.92726100  | 1.20972400  |
| O  | -1.43411700 | 1.25817100  | 2.05754100  |
| C  | -1.47534300 | 3.22913100  | 0.66512000  |
| C  | -0.57109800 | 3.95847400  | 1.44278100  |
| C  | -1.92842200 | 3.74855100  | -0.55317800 |
| C  | -0.12699100 | 5.20722800  | 1.00663900  |
| H  | -0.22173100 | 3.54337200  | 2.39137800  |
| C  | -1.47152400 | 4.98690200  | -0.98882300 |
| H  | -2.63871500 | 3.17080900  | -1.14606300 |
| C  | -0.57237400 | 5.72175500  | -0.20895400 |
| H  | 0.57880600  | 5.77457900  | 1.61875500  |
| H  | -1.82116100 | 5.38749400  | -1.94349000 |
| H  | -0.22185500 | 6.69816100  | -0.55267000 |

### <sup>3</sup>B<sub>Co-Cl</sub>

67

|    |             |             |             |
|----|-------------|-------------|-------------|
| C  | -0.93555200 | -0.42065100 | -1.59883400 |
| H  | -0.92899100 | 0.33879100  | -2.39302300 |
| H  | -0.30052400 | -1.25985800 | -1.90810800 |
| C  | -0.22260800 | 2.03745800  | -0.04150800 |
| P  | -0.12812000 | 0.22210100  | -0.04090200 |
| C  | 0.31748500  | 2.68491500  | 1.08371500  |
| C  | -0.69624200 | 2.81089300  | -1.10878000 |
| C  | -1.27895500 | -0.32301800 | 1.26437600  |
| C  | 0.35711400  | 4.07507900  | 1.14547200  |
| H  | 0.71524000  | 2.08662200  | 1.91048500  |
| C  | -0.65096100 | 4.20425100  | -1.04403600 |
| H  | -1.09630700 | 2.33900600  | -2.00910400 |
| C  | -2.19880200 | 0.55185700  | 1.85706900  |
| C  | -1.27582400 | -1.67880000 | 1.62525900  |
| H  | 0.77464800  | 4.56483400  | 2.02834800  |
| C  | -0.12752600 | 4.83866900  | 0.08143400  |
| H  | -1.02538500 | 4.79525900  | -1.88313400 |
| H  | -2.21653500 | 1.61000600  | 1.58282900  |
| C  | -3.11345200 | 0.07236900  | 2.79503300  |
| H  | -0.54697300 | -2.34585900 | 1.15765600  |
| C  | -2.19679400 | -2.14969700 | 2.55756700  |
| H  | -0.09257400 | 5.92962600  | 0.12842300  |
| H  | -3.83056200 | 0.76057200  | 3.24929600  |
| C  | -3.11659700 | -1.27767100 | 3.14326400  |
| H  | -2.19390700 | -3.20768700 | 2.83072000  |
| H  | -3.83664500 | -1.65175600 | 3.87526800  |
| Co | 1.96691000  | -0.64601600 | 0.15620800  |
| C  | 3.82698400  | 0.62377500  | -0.04832200 |
| C  | 4.14120300  | -0.76545100 | 0.15710700  |
| C  | 3.02738400  | 0.70507600  | -1.21237800 |
| C  | 3.65490200  | -1.51898300 | -0.96819700 |
| C  | 2.92669900  | -0.63042900 | -1.79012100 |
| C  | 4.20517900  | 1.73259300  | 0.86296800  |
| H  | 3.72101600  | 2.67768500  | 0.58394000  |
| H  | 3.92916200  | 1.50889800  | 1.90439300  |
| H  | 5.29296300  | 1.90825500  | 0.85036400  |
| C  | 2.52926500  | 1.93911000  | -1.86536000 |
| H  | 3.26605800  | 2.29598000  | -2.60433300 |
| H  | 1.59357100  | 1.77023200  | -2.41615800 |
| H  | 2.36529300  | 2.75954000  | -1.15432500 |
| C  | 4.95754500  | -1.29466000 | 1.27430800  |
| H  | 4.67898000  | -2.32301100 | 1.53946300  |
| H  | 6.02561600  | -1.30909400 | 1.00048300  |
| H  | 4.85777200  | -0.67656000 | 2.17538900  |
| C  | 3.78716200  | -2.98024800 | -1.18593400 |
| H  | 4.17413500  | -3.20208900 | -2.19176200 |
| H  | 4.46384400  | -3.44761200 | -0.45962900 |

|    |             |             |             |
|----|-------------|-------------|-------------|
| H  | 2.80391500  | -3.46741500 | -1.09994000 |
| C  | 2.26112800  | -0.98591400 | -3.06692600 |
| H  | 2.98815500  | -1.01759800 | -3.89573300 |
| H  | 1.79633600  | -1.98041300 | -3.01439400 |
| H  | 1.48849700  | -0.26111900 | -3.35531000 |
| F  | 0.98864400  | -2.27457200 | -0.30386100 |
| Cl | 1.89349100  | -0.37372000 | 2.44908200  |
| N  | -2.25552600 | -0.96085600 | -1.42513300 |
| C  | -3.44781400 | -0.34015300 | -1.18946700 |
| N  | -2.41239800 | -2.30976900 | -1.34327100 |
| C  | -4.34336200 | -1.40922500 | -0.97686600 |
| C  | -3.85361300 | 0.99848300  | -1.12182000 |
| N  | -3.64539100 | -2.58516800 | -1.08815500 |
| C  | -5.69479600 | -1.16622800 | -0.68543400 |
| C  | -5.19104300 | 1.21987900  | -0.82916900 |
| H  | -3.15751800 | 1.82432100  | -1.27533600 |
| H  | -6.38762300 | -1.99292200 | -0.51876700 |
| C  | -6.09877600 | 0.15678500  | -0.61431900 |
| H  | -5.55558500 | 2.24736400  | -0.76017000 |
| H  | -7.14078100 | 0.39148400  | -0.38625100 |

### TS<sub>A-B</sub>-S<sub>N</sub>2 (BnBr)

82

|    |             |             |             |
|----|-------------|-------------|-------------|
| P  | -1.29356100 | -0.83470800 | -0.17075400 |
| Co | 0.78975200  | -1.23831300 | 0.61761100  |
| C  | 1.18528500  | -3.19759700 | 0.17272300  |
| C  | 2.42945900  | -2.53763900 | 0.44812200  |
| C  | 0.37680400  | -3.11029400 | 1.36533800  |
| C  | 2.36649600  | -1.96316400 | 1.75239800  |
| C  | 1.08779100  | -2.32145000 | 2.31889100  |
| C  | 0.88239200  | -3.99897700 | -1.03907900 |
| H  | -0.18763600 | -4.22769100 | -1.12801000 |
| H  | 1.20168200  | -3.49143900 | -1.96017300 |
| H  | 1.41761400  | -4.96225800 | -1.00736100 |
| C  | -0.89594600 | -3.83370500 | 1.59406100  |
| H  | -0.67148600 | -4.89674500 | 1.77778300  |
| H  | -1.43862400 | -3.46777800 | 2.47418700  |
| H  | -1.56713900 | -3.81122700 | 0.72498700  |
| C  | 3.55775400  | -2.45773200 | -0.50460800 |
| H  | 4.30799600  | -1.69949400 | -0.23430400 |
| H  | 4.07183100  | -3.43254700 | -0.53010100 |
| H  | 3.20951500  | -2.26586500 | -1.52884400 |
| C  | 3.40368800  | -1.16805900 | 2.45348800  |
| H  | 3.84842700  | -1.75224500 | 3.27503400  |
| H  | 4.22590000  | -0.85092400 | 1.79372400  |
| H  | 2.96986100  | -0.26616600 | 2.91017500  |
| C  | 0.62255300  | -1.91178700 | 3.66216100  |
| H  | 1.15149900  | -2.48222200 | 4.44192300  |
| H  | 0.82764000  | -0.84833800 | 3.84148400  |
| H  | -0.45188300 | -2.08277200 | 3.80256500  |
| F  | 0.48246100  | 0.33213400  | 1.63266000  |
| F  | 1.44617200  | -0.11842600 | -0.88275600 |
| C  | 3.03368700  | 0.66475800  | -0.64263800 |
| H  | 3.50688900  | 0.13471600  | -1.46312400 |
| H  | 3.17185500  | 0.25963300  | 0.35392100  |
| Br | 5.85271000  | 0.75882800  | -0.05458600 |
| C  | 2.79473900  | 2.08918200  | -0.78540300 |
| C  | 2.80849100  | 2.68793900  | -2.05599000 |
| C  | 2.53125800  | 2.88607800  | 0.34240500  |
| C  | 2.58790300  | 4.05493800  | -2.19401500 |
| H  | 3.01011800  | 2.07009700  | -2.93526600 |
| C  | 2.31688600  | 4.25245400  | 0.20362100  |
| H  | 2.51129200  | 2.41891500  | 1.33053900  |
| C  | 2.34919400  | 4.84063600  | -1.06442500 |
| H  | 2.60897200  | 4.51384900  | -3.18523800 |
| H  | 2.12596700  | 4.86659600  | 1.08691700  |
| H  | 2.18475100  | 5.91577700  | -1.17165600 |
| C  | -2.40897100 | -0.77783500 | 1.31411500  |

|   |             |             |             |   |             |             |             |
|---|-------------|-------------|-------------|---|-------------|-------------|-------------|
| H | -2.67531800 | -1.79533700 | 1.62903700  | F | -0.16365500 | -1.38119200 | 1.36586200  |
| H | -1.78676500 | -0.32986900 | 2.10202900  | C | -1.36390900 | -2.21899100 | -0.01087200 |
| C | -2.00427200 | -1.98607800 | -1.38204200 | H | -0.78566000 | -3.13873100 | 0.04366100  |
| C | -1.36837100 | -2.03390700 | -2.63450300 | H | -0.98120400 | -1.43843800 | -0.65955300 |
| C | -3.09227700 | -2.83170800 | -1.13222200 | C | 2.82528800  | 1.54923700  | -0.55431900 |
| C | -1.81823900 | -2.90844100 | -3.61856900 | H | 3.77627900  | 1.62016200  | -0.00621300 |
| H | -0.51123000 | -1.38229200 | -2.83559500 | H | 2.97179500  | 0.83185600  | -1.37087900 |
| C | -3.53474900 | -3.71232200 | -2.12087200 | C | -2.61843300 | -2.06112400 | 0.75170700  |
| H | -3.61556700 | -2.79571700 | -0.17428400 | H | -3.30214100 | -2.89169100 | 0.51281300  |
| C | -2.90109500 | -3.75251000 | -3.36177600 | H | -2.36079000 | -2.22433500 | 1.81516900  |
| H | -1.31880700 | -2.93492800 | -4.58978200 | C | -3.29430900 | -0.71879900 | 0.56499800  |
| H | -4.38801300 | -4.36357600 | -1.91803500 | H | -3.52530400 | -0.58089300 | -0.50846600 |
| H | -3.25342900 | -4.44069400 | -4.13371200 | H | -2.57555400 | 0.08209900  | 0.81801600  |
| C | -1.56878500 | 0.79790500  | -0.93995700 | C | -4.56661100 | -0.55350300 | 1.38151600  |
| C | -2.68153800 | 0.99064200  | -1.77506100 | H | -4.34124200 | -0.72800400 | 2.44975800  |
| C | -0.74450300 | 1.88500500  | -0.62361200 | H | -5.28493100 | -1.34695200 | 1.10043000  |
| C | -2.96335000 | 2.25748600  | -2.28254300 | C | -5.22129800 | 0.80430200  | 1.22134100  |
| H | -3.34285400 | 0.15501400  | -2.02157600 | H | -5.42210500 | 0.99080100  | 0.15018600  |
| C | -1.03227900 | 3.14788400  | -1.13874200 | H | -4.50851700 | 1.59461500  | 1.52146300  |
| H | 0.10664700  | 1.72437000  | 0.03848400  | C | -6.51348700 | 0.95675900  | 2.00671600  |
| C | -2.13979700 | 3.33812600  | -1.96479200 | H | -6.31244500 | 0.75955800  | 3.07602500  |
| H | -3.83551300 | 2.39903200  | -2.92533900 | H | -7.22674800 | 0.16949300  | 1.70020600  |
| H | -0.38410200 | 3.99080700  | -0.88556700 | C | -7.16958300 | 2.31697300  | 1.86303200  |
| H | -2.36308000 | 4.33105900  | -2.36295000 | H | -7.36622900 | 2.51464800  | 0.79440900  |
| N | -4.74188400 | -0.52102000 | 0.65396500  | H | -6.45778200 | 3.10201900  | 2.17452000  |
| C | -5.11360000 | 1.57370300  | 1.05157400  | C | -8.45968300 | 2.45013500  | 2.65231300  |
| N | -3.60551000 | 0.00439900  | 1.17554300  | H | -8.29127700 | 2.30170900  | 3.72962000  |
| N | -5.64565400 | 0.39950300  | 0.58260500  | H | -8.91416000 | 3.44695800  | 2.53416100  |
| C | -3.77980000 | 1.33197300  | 1.43809800  | H | -9.20791900 | 1.71144700  | 2.33707300  |
| C | -5.66756600 | 2.85915400  | 1.17018300  | I | -2.27283800 | -3.18795700 | -2.49733700 |
| H | -6.69885500 | 3.05521200  | 0.87158800  | C | -0.02176400 | 1.50383300  | -0.17474700 |
| C | -2.94490700 | 2.33273200  | 1.94983700  | C | -0.64077500 | 2.62534900  | 0.40205200  |
| H | -1.90715300 | 2.13241400  | 2.22565600  | C | -0.54025500 | 0.96084400  | -1.36106200 |
| C | -4.84704100 | 3.85459400  | 1.67415000  | C | -1.76473600 | 3.18739100  | -0.20197000 |
| H | -5.23559900 | 4.86990200  | 1.77952000  | H | -0.23949800 | 3.07770600  | 1.31226600  |
| C | -3.50955300 | 3.59447400  | 2.05784800  | C | -1.66475900 | 1.52834300  | -1.95253300 |
| H | -2.90296900 | 4.41653800  | 2.44476400  | H | -0.04572500 | 0.10014100  | -1.81852700 |

### TS<sub>A-B'</sub>-S<sub>N</sub>2 (1-I)

|    |            |             |             |   |             |            |             |
|----|------------|-------------|-------------|---|-------------|------------|-------------|
| 93 |            |             |             | H | -2.23633000 | 4.06344000 | 0.24976400  |
| P  | 1.51063200 | 0.80691200  | 0.53194900  | H | -2.06683900 | 1.09172100 | -2.87254900 |
| Co | 1.65025700 | -1.46982300 | 0.39130800  | H | -3.16728900 | 3.08304500 | -1.84592800 |
| C  | 2.63268100 | -2.16988300 | 2.13653400  | C | 1.66301200  | 1.54711500 | 2.17803500  |
| C  | 1.90765400 | -3.28284700 | 1.61971400  | C | 2.73462800  | 2.35742400 | 2.57293700  |
| C  | 3.66633000 | -1.80475600 | 1.16383200  | C | 0.66813500  | 1.21283300 | 3.12036800  |
| C  | 2.37850700 | -3.52101200 | 0.29778400  | C | 2.81146300  | 2.82738900 | 3.88438800  |
| C  | 3.52471300 | -2.65748600 | 0.05923700  | H | 3.51225900  | 2.64896700 | 1.86017900  |
| C  | 2.49405900 | -1.61535000 | 3.49858000  | C | 0.74511600  | 1.69586300 | 4.42323000  |
| H  | 2.94011400 | -0.61459900 | 3.59468900  | H | -0.15472000 | 0.55842500 | 2.82023900  |
| H  | 1.44429800 | -1.55325300 | 3.81062600  | C | 1.82130900  | 2.50124400 | 4.81171800  |
| H  | 3.00749100 | -2.26257500 | 4.23326700  | H | 3.65270400  | 3.45780300 | 4.18144300  |
| C  | 4.72468800 | -0.79099100 | 1.39787800  | H | -0.03146500 | 1.43434000 | 5.14214800  |
| H  | 5.63415900 | -1.27842900 | 1.86912300  | H | 1.88345100  | 2.87089700 | 5.83612200  |
| H  | 5.05542300 | -0.31141300 | 0.43595000  | C | 1.97374800  | 3.09804900 | -2.35374600 |
| H  | 4.37506100 | 0.00283600  | 2.12188600  | C | 1.67850500  | 4.47541200 | -2.28996400 |
| C  | 0.80765800 | -3.98935200 | 2.32275200  | C | 1.73479500  | 2.32655900 | -3.49835700 |
| H  | 0.07520500 | -4.45906600 | 1.60260400  | C | 1.12171800  | 5.13770500 | -3.39670800 |
| H  | 1.23441000 | -4.82325700 | 2.97071800  | C | 1.18376000  | 2.99780600 | -4.57878600 |
| H  | 0.24330500 | -3.27762100 | 2.99423000  | H | 1.95099700  | 1.25660900 | -3.53149200 |
| C  | 1.86544700 | -4.49546500 | -0.68850500 | C | 0.88097600  | 4.37973500 | -4.53022500 |
| H  | 0.96364200 | -5.01645700 | -0.33408000 | H | 0.88900600  | 6.20313600 | -3.35290200 |
| H  | 1.63056200 | -4.00847800 | -1.64127200 | H | 0.97044100  | 2.44333400 | -5.49552000 |
| H  | 2.62446500 | -5.27147200 | -0.90779100 | H | 0.44543600  | 4.85373200 | -5.41257100 |
| C  | 4.30358800 | -2.64655200 | -1.20031200 | N | 2.48124700  | 2.82294000 | -1.11662500 |
| H  | 4.85662700 | -3.59004300 | -1.33021900 | N | 2.47391400  | 3.94136900 | -0.35000000 |
| H  | 3.63354100 | -2.54240800 | -2.07616300 | N | 2.01062600  | 4.93080400 | -1.03947900 |
| H  | 5.03724300 | -1.82357400 | -1.23602600 |   |             |            |             |
| F  | 1.53171500 | -1.25633800 | -1.47731000 |   |             |            |             |

**B'**<sub>Co-Br</sub>

67

|    |             |             |             |
|----|-------------|-------------|-------------|
| C  | -1.05949000 | -0.26194400 | -1.68728600 |
| H  | -1.12159500 | 0.55630700  | -2.41843400 |
| H  | -0.41285900 | -1.04777600 | -2.09569600 |
| C  | -0.34337100 | 2.09659400  | 0.01229500  |
| P  | -0.18521500 | 0.28783200  | -0.12297500 |
| C  | 0.23950800  | 2.68021900  | 1.15033500  |
| C  | -0.92334200 | 2.92660800  | -0.95444500 |
| C  | -1.29602200 | -0.35516700 | 1.18115800  |
| C  | 0.22292400  | 4.06194900  | 1.32192200  |
| H  | 0.71410200  | 2.03855300  | 1.90199100  |
| C  | -0.93565900 | 4.31130800  | -0.78090500 |
| H  | -1.36266200 | 2.50660000  | -1.86213900 |
| C  | -2.23625900 | 0.47032500  | 1.81168100  |
| C  | -1.25819600 | -1.72275300 | 1.49173100  |
| H  | 0.67606100  | 4.50219400  | 2.21339700  |
| C  | -0.36515400 | 4.88140400  | 0.35605600  |
| H  | -1.39272600 | 4.94633800  | -1.54349300 |
| H  | -2.28632100 | 1.53719600  | 1.57928100  |
| C  | -3.13304800 | -0.06651400 | 2.73664700  |
| H  | -0.50872200 | -2.34876700 | 1.00291500  |
| C  | -2.16239900 | -2.25212700 | 2.40879500  |
| H  | -0.37549600 | 5.96569300  | 0.48952300  |
| H  | -3.86441300 | 0.58631700  | 3.21977900  |
| C  | -3.10109800 | -1.42791900 | 3.03283500  |
| H  | -2.13034900 | -3.31934700 | 2.64189500  |
| H  | -3.80754900 | -1.84803500 | 3.75322200  |
| Co | 1.90438100  | -0.54159000 | -0.21104000 |
| C  | 3.46803300  | 0.78796900  | -0.33881500 |
| C  | 4.00174700  | -0.55720000 | -0.23407300 |
| C  | 2.68560700  | 0.85190400  | -1.53414100 |
| C  | 3.48582200  | -1.31852400 | -1.30959600 |
| C  | 2.63601100  | -0.46227900 | -2.10504700 |
| C  | 3.81520400  | 1.91608300  | 0.56053300  |
| H  | 3.13856400  | 2.77086300  | 0.43039800  |
| H  | 3.77319900  | 1.61232700  | 1.61618700  |
| H  | 4.83758800  | 2.27684600  | 0.36174500  |
| C  | 2.09323900  | 2.07228000  | -2.13187500 |
| H  | 2.77514600  | 2.46507100  | -2.90359900 |
| H  | 1.13427200  | 1.87839700  | -2.63198300 |
| H  | 1.94541200  | 2.87511100  | -1.39918600 |
| C  | 4.96032900  | -1.02619500 | 0.79450200  |
| H  | 4.78992300  | -2.07357400 | 1.07450700  |
| H  | 5.98953100  | -0.95378200 | 0.40588700  |
| H  | 4.90620200  | -0.42574500 | 1.71002400  |
| C  | 3.68340200  | -2.76271300 | -1.56719900 |
| H  | 4.22533900  | -2.92275800 | -2.51217500 |
| H  | 4.25073200  | -3.25487400 | -0.76796400 |
| H  | 2.71124200  | -3.26800200 | -1.65733600 |
| C  | 1.96032100  | -0.87508200 | -3.35865800 |
| H  | 2.68971200  | -0.98861300 | -4.17721900 |
| H  | 1.46285800  | -1.84881000 | -3.24320600 |
| H  | 1.21513100  | -0.14211100 | -3.69348800 |
| F  | 0.92234400  | -2.14882800 | -0.50148000 |
| N  | -2.35087300 | -0.86662500 | -1.50414100 |
| C  | -3.55966000 | -0.31306200 | -1.19660200 |
| N  | -2.45232800 | -2.22293700 | -1.50905900 |
| C  | -4.40460700 | -1.43015400 | -1.02782100 |
| C  | -4.01970600 | 0.99985800  | -1.03617000 |
| N  | -3.66443800 | -2.56607500 | -1.23642700 |
| C  | -5.75510700 | -1.26419100 | -0.68225200 |
| C  | -5.35567000 | 1.14528200  | -0.69325900 |
| H  | -3.36397500 | 1.86356200  | -1.15580500 |
| H  | -6.40713100 | -2.12904300 | -0.54758200 |
| C  | -6.21143600 | 0.03309500  | -0.51736100 |
| H  | -5.76009700 | 2.15017300  | -0.55173100 |
| H  | -7.25463700 | 0.20791800  | -0.24510400 |
| Br | 1.95298000  | -0.67909100 | 2.24545400  |

### B' Co-I

|    |             |             |             |
|----|-------------|-------------|-------------|
| 67 |             |             |             |
| C  | 1.24102700  | 0.24006700  | 1.76919700  |
| H  | 1.33414900  | 1.21931000  | 2.25991700  |
| H  | 0.59854100  | -0.40021000 | 2.38510900  |
| C  | 0.53401100  | 2.09064300  | -0.47522500 |
| P  | 0.32530000  | 0.38944600  | 0.14044400  |
| C  | -0.08979400 | 2.38703000  | -1.69892600 |
| C  | 1.19933900  | 3.11433700  | 0.21079500  |
| C  | 1.37125900  | -0.62266000 | -0.96870600 |
| C  | -0.03316100 | 3.67348700  | -2.22889600 |
| H  | -0.62797700 | 1.59901100  | -2.23816500 |
| C  | 1.25098500  | 4.40350300  | -0.32033100 |
| H  | 1.67184100  | 2.92623400  | 1.17739100  |
| C  | 2.23953300  | -0.04098800 | -1.90164200 |
| C  | 1.35068100  | -2.01817400 | -0.82028400 |
| H  | -0.52114400 | 3.88691300  | -3.18280000 |
| C  | 0.63686400  | 4.68593900  | -1.53956700 |
| H  | 1.77242800  | 5.19176400  | 0.22766400  |
| H  | 2.27824500  | 1.04387400  | -2.02752100 |
| C  | 3.07949200  | -0.84513100 | -2.67313600 |
| H  | 0.65910100  | -2.45988700 | -0.09905800 |
| C  | 2.19880400  | -2.81268000 | -1.58705000 |
| H  | 0.67719100  | 5.69662500  | -1.95236000 |
| H  | 3.75423300  | -0.38027200 | -3.39621600 |
| C  | 3.06378800  | -2.22981100 | -2.51519800 |
| H  | 2.17952600  | -3.89788300 | -1.46086700 |
| H  | 3.72605700  | -2.85688200 | -3.11723000 |
| Co | -1.78688200 | -0.29718900 | 0.55569300  |
| C  | -3.23071400 | 1.16533700  | 0.42486500  |
| C  | -3.88944200 | -0.10143600 | 0.66563900  |
| C  | -2.37472100 | 1.42626200  | 1.54381300  |
| C  | -3.35903200 | -0.65606300 | 1.85597200  |
| C  | -2.40112300 | 0.27893200  | 2.40101700  |
| C  | -3.54673700 | 2.09668300  | -0.68693600 |
| H  | -2.76996700 | 2.86133000  | -0.81784000 |
| H  | -3.65927500 | 1.56613200  | -1.64333700 |
| H  | -4.49504300 | 2.62651700  | -0.49859700 |
| C  | -1.66080900 | 2.69545900  | 1.82166100  |
| H  | -2.24793000 | 3.28747500  | 2.54238000  |
| H  | -0.67248300 | 2.54076300  | 2.27694100  |
| H  | -1.53604100 | 3.31495800  | 0.92524000  |
| C  | -4.99570700 | -0.66551300 | -0.14390900 |
| H  | -4.96986100 | -1.76170200 | -0.19055200 |
| H  | -5.95703400 | -0.38349200 | 0.31723200  |
| H  | -5.00164700 | -0.28110800 | -1.17080700 |
| C  | -3.66458100 | -1.97975600 | 2.44397700  |
| H  | -4.20192300 | -1.87405900 | 3.39934900  |
| H  | -4.28217400 | -2.59501600 | 1.77813100  |
| H  | -2.73582800 | -2.53008400 | 2.65063500  |
| C  | -1.68085900 | 0.09281800  | 3.68320500  |
| H  | -2.37143500 | 0.20328800  | 4.53488100  |
| H  | -1.24972300 | -0.91588800 | 3.75566200  |
| H  | -0.87644300 | 0.82575600  | 3.82534600  |
| F  | -0.85441200 | -1.81695400 | 1.22420800  |
| N  | 2.51519000  | -0.42303400 | 1.71009200  |
| C  | 3.71393300  | -0.02104000 | 1.19452000  |
| N  | 2.58996500  | -1.72801200 | 2.08816600  |
| C  | 4.52329300  | -1.17225500 | 1.29923200  |
| C  | 4.19203700  | 1.17689400  | 0.64741400  |
| N  | 3.77525600  | -2.17736300 | 1.85743400  |
| C  | 5.85301500  | -1.16075800 | 0.84948800  |
| C  | 5.50674700  | 1.16941200  | 0.20602800  |
| H  | 3.56447100  | 2.06440900  | 0.55576200  |
| H  | 6.47645500  | -2.05317900 | 0.92828600  |
| C  | 6.32594900  | 0.02061400  | 0.30296300  |
| H  | 5.92322100  | 2.07881900  | -0.23326900 |
| H  | 7.35371700  | 0.07313800  | -0.06277700 |

I -2.05706800 -1.32320200 -1.91936800

### Benzyl bromide (BnBr)

15  
C 0.76314900 0.00669700 1.11952600  
H 0.97915900 -0.88165400 1.72378100  
H 0.97825100 0.90235300 1.71322000  
C -0.61857300 0.00303300 0.57143500  
C -1.27670700 -1.20583300 0.30465900  
C -1.28041600 1.20856100 0.29893800  
C -2.56887300 -1.20933600 -0.21614500  
H -0.76502400 -2.15093500 0.50923700  
C -2.57263100 1.20568000 -0.22182700  
H -0.77160200 2.15612700 0.49914400  
C -3.21991200 -0.00343000 -0.48141100  
H -3.07240200 -2.15850300 -0.41544500  
H -3.07904700 2.15236800 -0.42554300  
H -4.23331300 -0.00596100 -0.88998600  
Br 2.13165000 -0.00131500 -0.31329900

### Benzyl fluoride (BnF)

15  
C -1.91057800 0.61548600 -0.02767900  
H -2.17574800 1.16461200 -0.94703500  
H -2.17067500 1.26770600 0.82264700  
C -0.45381200 0.27256500 -0.01174400  
C -0.01790300 -1.05511300 -0.01623000  
C 0.49623800 1.30258400 0.00317300  
C 1.34694800 -1.34879600 -0.00631000  
H -0.75371200 -1.86159800 -0.02580000  
C 1.85725900 1.00796100 0.01184500  
H 0.16162700 2.34447200 0.00870400  
C 2.28797600 -0.32071100 0.00749200  
H 1.67485800 -2.39148000 -0.00900200  
H 2.58828700 1.82039100 0.02385800  
H 3.35591100 -0.55187100 0.01569900  
F -2.70192400 -0.51512200 0.03862800

### 1-iodooctane (1-I)

26  
C -7.18804100 -0.56806500 0.00625700  
H -7.20945900 -1.18694700 0.91668000  
H -7.19120600 -1.25962200 -0.85049600  
H -8.13334300 -0.00743800 -0.02606000  
C -5.98169100 0.34647600 -0.01822300  
H -6.01945500 0.98981500 -0.91517000  
H -6.02565100 1.04397700 0.83705700  
C -4.65542600 -0.39397600 0.00811500  
H -4.60570300 -1.08611400 -0.85263500  
H -4.61636200 -1.04487800 0.90096800  
C -3.43992500 0.51542800 -0.00551500  
H -3.48313800 1.19872100 0.86238700  
H -3.48440000 1.17449400 -0.89189100  
C -2.11616700 -0.22778800 0.00312900  
H -2.06699200 -0.90148700 -0.87151900  
H -2.07413400 -0.89503600 0.88307900  
C -0.90141100 0.68355600 0.00522300  
H -0.94043200 1.34833800 0.88667100  
H -0.94292000 1.35688900 -0.86959500  
C 0.41879900 -0.07469300 -0.00087100  
H 0.46678000 -0.72647100 -0.88939100  
H 0.46227400 -0.74971500 0.87040300  
C 1.59857500 0.86343400 0.01510600  
H 1.62533600 1.49086100 0.91605800  
H 1.62552800 1.52217100 -0.86323100  
I 3.51330200 -0.17233600 -0.00231400

### 1-fluorooctane (1-F)

26  
C -5.04908100 -0.33851700 -0.00335600  
H -5.11923600 -0.94990200 0.90964100  
H -5.09767500 -1.03211900 -0.85710700  
H -5.95165900 0.28807500 -0.04340100  
C -3.77936400 0.48546600 -0.02609700  
H -3.76374500 1.12165700 -0.92881400  
H -3.77774200 1.19179300 0.82306400  
C -2.51192700 -0.35100600 0.01595600  
H -2.50913900 -1.05344300 -0.83789300  
H -2.52685600 -0.99426900 0.91506500  
C -1.23193100 0.46471900 0.00134100  
H -1.22570900 1.15384800 0.86574700  
H -1.22539000 1.12099800 -0.88827000  
C 0.03310300 -0.37411700 0.01548900  
H 0.03365000 -1.05241400 -0.85706500  
H 0.02427100 -1.04024100 0.89731100  
C 1.31079500 0.44534300 0.01646900  
H 1.32159500 1.10653600 0.90175100  
H 1.30964000 1.12704600 -0.85318200  
C 2.57434300 -0.39516300 -0.00376600  
H 2.58973900 -1.03697800 -0.90095700  
H 2.59265000 -1.07940800 0.86149700  
C 3.82285600 0.44153700 0.01291700  
H 3.88363100 1.05905900 0.92482700  
H 3.86404400 1.12288600 -0.85348500  
F 4.95168400 -0.36918900 -0.02805000

### <sup>3</sup>TS<sub>A-B</sub>- S<sub>N</sub>2 (BnBr)

82  
P 1.33313000 -0.78115300 0.22797900  
Co -0.77981900 -1.13286600 -0.58719500  
C -1.21821200 -3.15665400 -0.15943800  
C -2.48583300 -2.54748000 -0.40127700  
C -0.45360800 -3.13448600 -1.40851500  
C -2.45341200 -2.01986000 -1.72412100  
C -1.22062900 -2.44870700 -2.36395800  
C -0.84467300 -3.90463700 1.06513200  
H 0.23595600 -4.08430700 1.13807200  
H -1.17328300 -3.38758000 1.97799300  
H -1.33572900 -4.89235000 1.07028300  
C 0.82261600 -3.86149400 -1.61777200  
H 0.63006700 -4.94404100 -1.69497900  
H 1.33398600 -3.55882000 -2.54025600  
H 1.52161300 -3.74124200 -0.77731200  
C -3.59776900 -2.47554000 0.57749500  
H -4.37890800 -1.75623500 0.28935600  
H -4.08190000 -3.46114500 0.67487500  
H -3.23675700 -2.20536500 1.57984200  
C -3.51430600 -1.25251400 -2.41619100  
H -4.01161900 -1.88242300 -3.17207400  
H -4.29462400 -0.87527500 -1.73740300  
H -3.09072700 -0.39639400 -2.96271200  
C -0.84001300 -2.08626700 -3.74825500  
H -1.55489200 -2.49508900 -4.47906800  
H -0.84328800 -0.99383400 -3.88107800  
H 0.15772800 -2.45534800 -4.01600200  
F -0.43929900 0.31541300 -1.73392400  
F -1.50581100 -0.11325700 1.05419700  
C -3.14301300 0.65403400 0.72226100  
H -3.60511000 0.16468200 1.57267100  
H -3.21978000 0.16949000 -0.24464600  
Br -5.87908900 0.77283600 0.07308200  
C -2.88831300 2.08026900 0.76813400  
C -2.93603400 2.77658500 1.98753200  
C -2.57205900 2.78366200 -0.40781400  
C -2.70323100 4.14784400 2.02547800

|   |             |             |             |   |             |             |             |
|---|-------------|-------------|-------------|---|-------------|-------------|-------------|
| H | -3.17506600 | 2.23110900  | 2.90438200  | H | 0.99898300  | -5.04075000 | -0.32154600 |
| C | -2.34306000 | 4.15410400  | -0.36845200 | H | 1.60424700  | -4.00313800 | -1.62995400 |
| H | -2.51980100 | 2.23975300  | -1.35489500 | H | 2.65052900  | -5.24318600 | -0.93948300 |
| C | -2.41519800 | 4.84076200  | 0.84736200  | C | 4.29936100  | -2.62518900 | -1.21008900 |
| H | -2.75295800 | 4.68315400  | 2.97663700  | H | 4.93936200  | -3.51773000 | -1.29855500 |
| H | -2.11125400 | 4.69506600  | -1.28912100 | H | 3.62934900  | -2.62860600 | -2.08126500 |
| H | -2.24133900 | 5.91935800  | 0.87624900  | H | 4.95134500  | -1.74575700 | -1.28671600 |
| C | 2.43102300  | -0.82018000 | -1.27135200 | F | 1.53472400  | -1.25600900 | -1.47475400 |
| H | 2.64464500  | -1.85924200 | -1.55407000 | F | -0.16119200 | -1.37044800 | 1.37309100  |
| H | 1.82319400  | -0.37433400 | -2.07181700 | C | -1.35934900 | -2.22256200 | 0.00217100  |
| C | 2.02624100  | -1.90492400 | 1.47090300  | H | -0.78424600 | -3.14602500 | 0.06812700  |
| C | 1.42582600  | -1.87446300 | 2.74165700  | H | -0.97305800 | -1.44712500 | -0.65245700 |
| C | 3.06035700  | -2.81623600 | 1.22040400  | C | 2.81730300  | 1.54845500  | -0.55521700 |
| C | 1.85829900  | -2.73814000 | 3.74306400  | H | 3.77298900  | 1.61206800  | -0.01693800 |
| H | 0.61061500  | -1.17150900 | 2.94289400  | H | 2.95050800  | 0.83026400  | -1.37575800 |
| C | 3.48630000  | -3.68257100 | 2.22841500  | C | -2.61940500 | -2.06122000 | 0.75917200  |
| H | 3.55572700  | -2.84399200 | 0.24756600  | H | -3.30134800 | -2.89350600 | 0.52121500  |
| C | 2.88764300  | -3.64674800 | 3.48685700  | H | -2.36672900 | -2.21745200 | 1.82292100  |
| H | 1.38672400  | -2.70479000 | 4.72783400  | C | -3.29796700 | -0.72054600 | 0.56044300  |
| H | 4.29846100  | -4.38468200 | 2.02663600  | H | -3.52394100 | -0.58957900 | -0.51326600 |
| H | 3.22599100  | -4.32559100 | 4.27313500  | H | -2.58092000 | 0.08216200  | 0.81257400  |
| C | 1.62776700  | 0.87488000  | 0.92421700  | C | -4.56583700 | -0.55674300 | 1.37637400  |
| C | 2.79540700  | 1.12788200  | 1.66204800  | H | -4.34041900 | -0.72932900 | 2.44491700  |
| C | 0.73586200  | 1.91903800  | 0.65342800  | H | -5.28245600 | -1.35203300 | 1.10116500  |
| C | 3.06700700  | 2.41716400  | 2.11431100  | C | -5.22824900 | 0.79950900  | 1.21416500  |
| H | 3.50428600  | 0.32119200  | 1.87293600  | H | -5.42912800 | 0.98414000  | 0.14270000  |
| C | 1.01155800  | 3.20460700  | 1.11635200  | H | -4.51716900 | 1.59168400  | 1.51341200  |
| H | -0.16439700 | 1.71229800  | 0.07411200  | C | -6.51597100 | 0.95039700  | 2.00396400  |
| C | 2.17530000  | 3.45610300  | 1.84281000  | H | -6.31483300 | 0.75506300  | 3.07359800  |
| H | 3.98210100  | 2.60996200  | 2.67950000  | H | -7.22753600 | 0.16126000  | 1.69832400  |
| H | 0.31044100  | 4.01499400  | 0.90245000  | C | -7.17980200 | 2.30907800  | 1.85824200  |
| H | 2.38966500  | 4.46638200  | 2.19991600  | H | -7.37654400 | 2.50489600  | 0.78929400  |
| N | 4.79019700  | -0.66970700 | -0.67444300 | H | -6.46969400 | 3.09599800  | 2.16886200  |
| C | 5.24219700  | 1.40775900  | -1.08181000 | C | -8.46539700 | 2.44067300  | 2.64697500  |
| N | 3.66436600  | -0.09385400 | -1.16653400 | H | -8.29700300 | 2.28905900  | 3.72453600  |
| N | 5.73417900  | 0.21081300  | -0.62606700 | H | -8.92688000 | 3.43141100  | 2.52734200  |
| C | 3.89025400  | 1.22418800  | -1.43557100 | H | -9.21203900 | 1.69503100  | 2.33253400  |
| C | 5.84782300  | 2.66805300  | -1.21565500 | I | -2.26558500 | -3.19677900 | -2.49323000 |
| H | 6.89385500  | 2.81947800  | -0.94342300 | C | -0.02475900 | 1.50275500  | -0.17139200 |
| C | 3.08645400  | 2.25899700  | -1.92788500 | C | -0.64622400 | 2.62378900  | 0.39870400  |
| H | 2.03558400  | 2.10161100  | -2.18203200 | C | -0.54180100 | 0.95709500  | -1.35711300 |
| C | 5.05833900  | 3.69800500  | -1.69985700 | C | -1.77115700 | 3.18271300  | -0.20640200 |
| H | 5.48781600  | 4.69542800  | -1.81629300 | H | -0.24613200 | 3.07820200  | 1.30841500  |
| C | 3.70175400  | 3.49565200  | -2.05031700 | C | -1.66729200 | 1.52149100  | -1.95467600 |
| H | 3.12205900  | 4.34274600  | -2.42431600 | H | -0.04538400 | 0.09678000  | -1.81326600 |

### <sup>3</sup>TS<sub>A-B</sub><sup>1</sup>- S<sub>N</sub>2 (I-D)

|    |            |             |             |   |             |            |             |
|----|------------|-------------|-------------|---|-------------|------------|-------------|
| 93 |            |             |             | H | -2.24466700 | 4.05841000 | 0.24400500  |
| P  | 1.50885400 | 0.80992600  | 0.53668700  | H | -2.06321500 | 1.08279600 | -2.87421100 |
| Co | 1.65316600 | -1.46670700 | 0.39418700  | H | -3.16802300 | 3.07326500 | -1.85061500 |
| C  | 2.63651200 | -2.16239100 | 2.13064900  | C | 1.65925000  | 1.55267900 | 2.18180700  |
| C  | 1.91890000 | -3.28754000 | 1.62014600  | C | 2.73409600  | 2.36071100 | 2.57590900  |
| C  | 3.66969700 | -1.79647200 | 1.16273800  | C | 0.66478800  | 1.22264900 | 3.11931200  |
| C  | 2.39062900 | -3.51654300 | 0.29866200  | C | 2.80959600  | 2.83261700 | 3.88674200  |
| C  | 3.53014400 | -2.64599900 | 0.05425900  | H | 3.51133500  | 2.64287000 | 1.86297600  |
| C  | 2.50136100 | -1.60627700 | 3.49690600  | C | 0.74040800  | 1.70760800 | 4.42153600  |
| H  | 2.93035600 | -0.59946400 | 3.58676600  | H | -0.16163800 | 0.57115500 | 2.81983400  |
| H  | 1.45135700 | -1.56589200 | 3.81860200  | C | 1.81484400  | 2.51071300 | 4.80923300  |
| H  | 3.03091500 | -2.24648700 | 4.22260600  | H | 3.64946300  | 3.46515100 | 4.18317700  |
| C  | 4.71591600 | -0.77022500 | 1.39570400  | H | -0.04083700 | 1.45047900 | 5.14058300  |
| H  | 5.49124500 | -1.15515700 | 2.07787000  | H | 1.87593800  | 2.88688600 | 5.83315100  |
| H  | 5.22095300 | -0.47128200 | 0.46821100  | C | 1.96811800  | 3.09807500 | -2.35699300 |
| H  | 4.30946200 | 0.13387700  | 1.87353100  | C | 1.67004700  | 4.47491800 | -2.29517100 |
| C  | 0.83513500 | -4.00533800 | 2.33384600  | C | 1.73106900  | 2.32454100 | -3.50062100 |
| H  | 0.28360900 | -4.68765900 | 1.67440600  | C | 1.11222600  | 5.13456500 | -3.40297300 |
| H  | 1.24365500 | -4.61223900 | 3.15777600  | C | 1.17897500  | 2.99319000 | -4.58211800 |
| H  | 0.11412600 | -3.30396900 | 2.77421000  | H | 1.94946500  | 1.25499100 | -3.53223700 |
| C  | 1.87984200 | -4.49838900 | -0.68644500 | C | 0.87335800  | 4.37456300 | -4.53552600 |
|    |            |             |             | H | 0.87732700  | 6.19957700 | -3.36068400 |
|    |            |             |             | H | 0.96705100  | 2.43703600 | -5.49815700 |

|   |            |            |             |
|---|------------|------------|-------------|
| H | 0.43710200 | 4.84646800 | -5.41863900 |
| N | 2.47582400 | 2.82568600 | -1.11935400 |
| N | 2.46598800 | 3.94514100 | -0.35425500 |
| N | 2.00087800 | 4.93268900 | -1.04521200 |

**<sup>3</sup>B'** Co-Br

67

|    |             |             |             |
|----|-------------|-------------|-------------|
| C  | -1.09437800 | -0.30660800 | -1.68624300 |
| H  | -1.13040300 | 0.49831400  | -2.43346600 |
| H  | -0.45320700 | -1.11234600 | -2.06389000 |
| C  | -0.37842300 | 2.07260200  | -0.01744200 |
| P  | -0.24224700 | 0.26046000  | -0.11976300 |
| C  | 0.17167600  | 2.67730500  | 1.12648300  |
| C  | -0.90529700 | 2.88782200  | -1.02737300 |
| C  | -1.34218500 | -0.37540600 | 1.18861700  |
| C  | 0.17544800  | 4.06311900  | 1.26005400  |
| H  | 0.60384500  | 2.05041800  | 1.91423300  |
| C  | -0.89747700 | 4.27653200  | -0.89105800 |
| H  | -1.32032000 | 2.45225100  | -1.93908300 |
| C  | -2.28159300 | 0.44168900  | 1.83074400  |
| C  | -1.28103900 | -1.74230500 | 1.49749500  |
| H  | 0.60262200  | 4.51847000  | 2.15661600  |
| C  | -0.35861600 | 4.86691200  | 0.25077400  |
| H  | -1.31354200 | 4.89841300  | -1.68712700 |
| H  | -2.34480500 | 1.50768000  | 1.59645800  |
| C  | -3.15823700 | -0.10637000 | 2.76745100  |
| H  | -0.53675800 | -2.36102900 | 0.98931300  |
| C  | -2.16547900 | -2.28239900 | 2.42771200  |
| H  | -0.35180500 | 5.95447900  | 0.35415900  |
| H  | -3.89103400 | 0.53644200  | 3.26152100  |
| C  | -3.10432300 | -1.46777400 | 3.06367100  |
| H  | -2.11862700 | -3.34897500 | 2.66064400  |
| H  | -3.79512800 | -1.89556900 | 3.79450700  |
| Co | 1.87239100  | -0.58590700 | -0.10286500 |
| C  | 3.65141800  | 0.75716100  | -0.43750400 |
| C  | 4.04381800  | -0.61617800 | -0.27042800 |
| C  | 2.76956000  | 0.80956900  | -1.54468100 |
| C  | 3.49547100  | -1.38626700 | -1.35673700 |
| C  | 2.68915500  | -0.52145400 | -2.12810000 |
| C  | 4.06150100  | 1.88103200  | 0.44187300  |
| H  | 3.48256100  | 2.79230900  | 0.24249700  |
| H  | 3.93428600  | 1.63094400  | 1.50592800  |
| H  | 5.12423900  | 2.13522100  | 0.29749800  |
| C  | 2.17306100  | 2.02692800  | -2.14525600 |
| H  | 2.80764200  | 2.39023700  | -2.97062500 |
| H  | 1.18095100  | 1.83663900  | -2.57823600 |
| H  | 2.07925200  | 2.85053100  | -1.42554400 |
| C  | 4.99621800  | -1.11209600 | 0.75047700  |
| H  | 4.78239600  | -2.14636800 | 1.05039600  |
| H  | 6.02437600  | -1.09739100 | 0.35171100  |
| H  | 4.98409000  | -0.49161100 | 1.65554900  |
| C  | 3.67444800  | -2.83746800 | -1.60078000 |
| H  | 4.25819200  | -3.02349900 | -2.51626700 |
| H  | 4.19591800  | -3.33539800 | -0.77361400 |
| H  | 2.69882300  | -3.32781300 | -1.72678000 |
| C  | 1.94893600  | -0.89971400 | -3.35606400 |
| H  | 2.63222600  | -0.98957700 | -4.21691900 |
| H  | 1.45620400  | -1.87619400 | -3.24326500 |
| H  | 1.18809100  | -0.15891500 | -3.63428300 |
| F  | 0.88554800  | -2.20644700 | -0.59134800 |
| N  | -2.39778200 | -0.88317000 | -1.50348300 |
| C  | -3.59440000 | -0.29981900 | -1.20368700 |
| N  | -2.52619200 | -2.23747700 | -1.48317600 |
| C  | -4.46144900 | -1.39614300 | -1.01348200 |
| C  | -4.02591500 | 1.02531300  | -1.06719400 |
| N  | -3.74470000 | -2.55049700 | -1.20316300 |
| C  | -5.80748400 | -1.19571900 | -0.66899300 |
| C  | -5.35785000 | 1.20468400  | -0.72431900 |

|    |             |             |             |
|----|-------------|-------------|-------------|
| H  | -3.35342100 | 1.87284800  | -1.20649000 |
| H  | -6.47761300 | -2.04387500 | -0.51812100 |
| C  | -6.23600700 | 0.11382900  | -0.52674800 |
| H  | -5.74133200 | 2.22013200  | -0.60100100 |
| H  | -7.27475100 | 0.31549500  | -0.25611800 |
| Br | 1.98439000  | -0.48960800 | 2.32996900  |

**<sup>3</sup>B'** Co-I

67

|    |             |             |             |
|----|-------------|-------------|-------------|
| C  | 1.24993500  | 0.28155800  | 1.76436400  |
| H  | 1.33483800  | 1.28239500  | 2.20850500  |
| H  | 0.59831200  | -0.32916900 | 2.40247500  |
| C  | 0.56696500  | 2.04455000  | -0.55785300 |
| P  | 0.37181600  | 0.36451800  | 0.11082900  |
| C  | 0.08003500  | 2.26588100  | -1.85831700 |
| C  | 1.07863600  | 3.13055100  | 0.16670600  |
| C  | 1.40861700  | -0.70724200 | -0.94072800 |
| C  | 0.11768000  | 3.53821100  | -2.42123200 |
| H  | -0.33448100 | 1.43004700  | -2.43232000 |
| C  | 1.10713500  | 4.40601400  | -0.39907300 |
| H  | 1.46380200  | 3.00002100  | 1.18076500  |
| C  | 2.30155900  | -0.18938600 | -1.88790200 |
| C  | 1.34337200  | -2.09373300 | -0.73261300 |
| H  | -0.25939300 | 3.69056000  | -3.43508000 |
| C  | 0.62821200  | 4.61323500  | -1.69152200 |
| H  | 1.51074200  | 5.24113800  | 0.17799200  |
| H  | 2.37199400  | 0.88803700  | -2.05659600 |
| C  | 3.12302800  | -1.05018800 | -2.61593800 |
| H  | 0.63877200  | -2.48661100 | 0.00460500  |
| C  | 2.17371300  | -2.94462200 | -1.45724100 |
| H  | 0.65248900  | 5.61288900  | -2.13137500 |
| C  | 3.81808600  | -0.63785300 | -3.35137600 |
| C  | 3.06303500  | -2.42626500 | -2.40010900 |
| H  | 2.12188700  | -4.02231200 | -1.28555500 |
| H  | 3.71071500  | -3.09777700 | -2.96907200 |
| Co | -1.76034300 | -0.36451200 | 0.52514600  |
| C  | -2.95130900 | 1.37958000  | 0.79293600  |
| C  | -3.85576000 | 0.30408900  | 0.58178200  |
| C  | -2.26249200 | 1.14556900  | 2.06419900  |
| C  | -3.61997300 | -0.65350100 | 1.62006800  |
| C  | -2.71868300 | -0.07640100 | 2.59014900  |
| C  | -2.87489300 | 2.62780600  | -0.00677500 |
| H  | -1.93770800 | 3.17483900  | 0.16229800  |
| H  | -2.96526200 | 2.43209500  | -1.08522500 |
| H  | -3.69713100 | 3.31285300  | 0.26030500  |
| C  | -1.38180000 | 2.13595000  | 2.73118700  |
| H  | -1.98858600 | 2.93244200  | 3.19296100  |
| H  | -0.77377200 | 1.69112600  | 3.52874800  |
| H  | -0.70970700 | 2.64382500  | 2.02538700  |
| C  | -4.90013500 | 0.22158900  | -0.46813300 |
| H  | -5.10801700 | -0.81181500 | -0.77484600 |
| H  | -5.84700700 | 0.63965600  | -0.08636600 |
| H  | -4.63516900 | 0.79277800  | -1.36714500 |
| C  | -4.27077200 | -1.97650300 | 1.75945700  |
| H  | -5.14631400 | -1.91909900 | 2.42720300  |
| H  | -4.62126100 | -2.36448200 | 0.79429200  |
| H  | -3.58571100 | -2.71555900 | 2.19687200  |
| C  | -2.26567700 | -0.76576500 | 3.81997300  |
| H  | -3.11963500 | -1.08297700 | 4.43786000  |
| H  | -1.69778900 | -1.67402100 | 3.56597000  |
| H  | -1.62337700 | -0.12959200 | 4.44192200  |
| F  | -0.86921100 | -1.82348200 | 1.36557400  |
| N  | 2.53002200  | -0.36795600 | 1.74310200  |
| C  | 3.72142600  | 0.04429700  | 1.22076500  |
| N  | 2.62994000  | -1.65728700 | 2.16452400  |
| C  | 4.55688100  | -1.08234800 | 1.36975400  |
| C  | 4.16766500  | 1.23536000  | 0.63441200  |
| N  | 3.82800100  | -2.08547800 | 1.95745500  |

|   |            |             |            |   |             |             |             |
|---|------------|-------------|------------|---|-------------|-------------|-------------|
| C | 5.88821400 | -1.05072100 | 0.92536000 | C | 6.33205000  | 0.12380900  | 0.34033200  |
| C | 5.48428700 | 1.24724500  | 0.19878800 | H | 5.87994700  | 2.15096400  | -0.27044000 |
| H | 3.51382600 | 2.10095400  | 0.51096700 | H | 7.35996000  | 0.19055800  | -0.02270000 |
| H | 6.53577500 | -1.92216900 | 1.03698100 | I | -2.08202500 | -1.22311300 | -2.13833800 |

## Structures optimized at the B3LYP-D3BJ (PCM = dichloromethane)/def2-SVP level of theory

### A<sub>Co-F</sub>

67

|    |             |             |             |
|----|-------------|-------------|-------------|
| C  | -4.21196100 | -1.39481800 | -0.90874000 |
| C  | -0.79939100 | -0.47929500 | -1.61842800 |
| H  | -0.76793200 | 0.27586800  | -2.41458700 |
| H  | -0.17522000 | -1.33054500 | -1.91371600 |
| C  | -0.05847600 | 1.99561100  | -0.05515000 |
| N  | -2.30665000 | -2.33904100 | -1.31961400 |
| N  | -3.53042700 | -2.58800100 | -1.01130600 |
| P  | -0.01185000 | 0.17586300  | -0.03751600 |
| C  | -3.30908900 | -0.34503600 | -1.19374900 |
| C  | -5.54969600 | -1.12220200 | -0.57160200 |
| C  | 0.47373000  | 2.60824500  | 1.09560000  |
| C  | -0.51659700 | 2.79040000  | -1.11424400 |
| N  | -2.13222400 | -0.99527100 | -1.45145700 |
| C  | -1.22930200 | -0.29990200 | 1.24132100  |
| C  | -3.69996000 | 1.00293100  | -1.16271600 |
| C  | -5.93714000 | 0.20981100  | -0.53167600 |
| H  | -6.24354200 | -1.93374600 | -0.34710300 |
| C  | 0.50568300  | 3.99819500  | 1.19392500  |
| H  | 0.88434000  | 1.97021600  | 1.88243800  |
| C  | -0.46747900 | 4.18525200  | -1.01559400 |
| H  | -0.90992700 | 2.34086500  | -2.02717300 |
| C  | -2.15869400 | 0.62826100  | 1.73558300  |
| C  | -1.29859100 | -1.64190700 | 1.64990400  |
| H  | -3.00529700 | 1.81503100  | -1.36943300 |
| C  | -5.02376400 | 1.25450500  | -0.82590800 |
| H  | -6.96570600 | 0.46613400  | -0.26942300 |
| H  | 0.91493300  | 4.46774400  | 2.09125200  |
| C  | 0.03381400  | 4.78982600  | 0.13985900  |
| H  | -0.82616700 | 4.79777700  | -1.84559400 |
| H  | -2.11912600 | 1.67135900  | 1.42274600  |
| C  | -3.15586500 | 0.21645900  | 2.62232800  |
| H  | -0.55441200 | -2.34011100 | 1.26606600  |
| C  | -2.30358900 | -2.04571000 | 2.53007100  |
| H  | -5.37186300 | 2.28878300  | -0.78110600 |
| H  | 0.06493700  | 5.87897700  | 0.21662700  |
| H  | -3.87901800 | 0.94454200  | 2.99653000  |
| C  | -3.23476800 | -1.12208800 | 3.01543800  |
| H  | -2.35933100 | -3.09230500 | 2.83849800  |
| H  | -4.02139400 | -1.44526200 | 3.70148900  |
| Co | 2.02629400  | -0.61115400 | 0.25701700  |
| C  | 3.46184500  | 0.77894900  | -0.32943000 |
| C  | 4.11717200  | -0.25224400 | 0.43787800  |
| C  | 2.90410300  | 0.16324900  | -1.50509700 |
| C  | 3.88873900  | -1.49417900 | -0.20315800 |
| C  | 3.11539200  | -1.24073700 | -1.40482700 |
| C  | 3.53634100  | 2.24098100  | -0.03281300 |
| H  | 2.77000000  | 2.80859000  | -0.57504400 |
| H  | 3.40003000  | 2.43314900  | 1.04003100  |
| H  | 4.52284500  | 2.64288400  | -0.32235900 |
| C  | 2.27135900  | 0.89292600  | -2.64565500 |
| H  | 3.05793800  | 1.25900900  | -3.32686700 |
| H  | 1.60627200  | 0.24677400  | -3.23373800 |
| H  | 1.70368700  | 1.77035600  | -2.30872500 |
| C  | 4.74940800  | -0.01741100 | 1.76800300  |
| H  | 5.25371500  | -0.91605400 | 2.14686600  |
| H  | 5.48323100  | 0.80175400  | 1.71853600  |
| H  | 3.95525100  | 0.26343900  | 2.47935200  |

|   |            |             |             |
|---|------------|-------------|-------------|
| C | 4.23922300 | -2.86172300 | 0.27974000  |
| H | 4.81924000 | -3.41256500 | -0.47790200 |
| H | 4.82301600 | -2.83151200 | 1.20915300  |
| H | 3.30651000 | -3.41749900 | 0.46854000  |
| C | 2.61929000 | -2.31476800 | -2.31627000 |
| H | 3.45414800 | -2.90451800 | -2.72746500 |
| H | 1.96827700 | -2.99040100 | -1.73949700 |
| H | 2.04652000 | -1.90730100 | -3.16050300 |
| F | 1.74598900 | -0.14140600 | 2.04530000  |
| F | 1.21473700 | -2.30787400 | 0.37853000  |

### TS<sub>A-B</sub>

81

|    |             |             |             |
|----|-------------|-------------|-------------|
| C  | 4.58951700  | -0.11674200 | -1.69090900 |
| C  | 1.38351000  | -1.74690700 | -1.36303500 |
| H  | 1.49552700  | -2.82279500 | -1.17951600 |
| H  | 0.75199700  | -1.58238400 | -2.24379600 |
| C  | 0.75097300  | -1.83156500 | 1.55856500  |
| N  | 2.75993800  | -0.40556900 | -2.81045900 |
| N  | 3.89998900  | 0.18744400  | -2.84401700 |
| P  | 0.39861900  | -0.92226700 | 0.01527700  |
| C  | 3.78620300  | -0.97949700 | -0.90990500 |
| C  | 5.85339400  | 0.30209200  | -1.23898700 |
| C  | 0.26933200  | -1.28827100 | 2.76411500  |
| C  | 1.39493800  | -3.07825900 | 1.58234200  |
| N  | 2.65037600  | -1.12996800 | -1.66199800 |
| C  | 1.25583600  | 0.68296800  | 0.15181500  |
| C  | 4.21609300  | -1.46222000 | 0.33687400  |
| C  | 6.27488000  | -0.16579800 | -0.00260400 |
| H  | 6.46556900  | 0.97264600  | -1.84408800 |
| C  | 0.45465900  | -1.97205300 | 3.96680500  |
| H  | -0.26187100 | -0.33662700 | 2.75224500  |
| C  | 1.57264100  | -3.76151300 | 2.78836300  |
| H  | 1.75887500  | -3.54146400 | 0.66529200  |
| C  | 2.14135800  | 0.97167500  | 1.20049700  |
| C  | 1.12549900  | 1.57797400  | -0.92282600 |
| H  | 3.60191000  | -2.11839400 | 0.94907800  |
| C  | 5.46598800  | -1.03803100 | 0.76934800  |
| H  | 7.24794800  | 0.13834600  | 0.38872700  |
| H  | 0.07985400  | -1.53659000 | 4.89572400  |
| C  | 1.10660200  | -3.20939600 | 3.98378400  |
| H  | 2.07664500  | -4.73031700 | 2.78865200  |
| H  | 2.25805000  | 0.27975400  | 2.03392500  |
| C  | 2.90225800  | 2.14094400  | 1.16555100  |
| H  | 0.42648300  | 1.34134200  | -1.72518100 |
| C  | 1.90389600  | 2.73404300  | -0.95712200 |
| H  | 5.83581400  | -1.38383500 | 1.73718400  |
| H  | 1.24618400  | -3.74435100 | 4.92574100  |
| H  | 3.59269400  | 2.35949500  | 1.98312000  |
| C  | 2.79266100  | 3.01691300  | 0.08238700  |
| H  | 1.80318700  | 3.42497700  | -1.79570700 |
| H  | 3.39369300  | 3.92837100  | 0.05426500  |
| Co | -1.72172700 | -0.79252100 | -0.77136100 |
| C  | -3.36754000 | -1.51701100 | 0.32361400  |
| C  | -3.82198000 | -1.04384100 | -0.97481400 |
| C  | -2.45891600 | -2.58500000 | 0.10671600  |
| C  | -3.15430800 | -1.79324900 | -1.97197800 |
| C  | -2.23587100 | -2.69410200 | -1.31481600 |
| C  | -3.88021800 | -1.06259300 | 1.64911400  |

|    |             |             |             |    |             |             |             |
|----|-------------|-------------|-------------|----|-------------|-------------|-------------|
| H  | -3.13963500 | -1.23551800 | 2.44087000  | C  | 3.67231000  | -1.43023200 | -0.93370600 |
| H  | -4.12350800 | 0.00742100  | 1.64133700  | C  | 2.90324400  | -0.52565500 | -1.75728400 |
| H  | -4.79343000 | -1.62726000 | 1.90684100  | C  | 3.95332000  | 1.74013200  | 1.06089700  |
| C  | -1.94186300 | -3.50809300 | 1.15559800  | H  | 3.32128800  | 2.62164700  | 0.89091100  |
| H  | -2.72471500 | -4.25815700 | 1.36262700  | H  | 3.78185500  | 1.39205700  | 2.08881400  |
| H  | -1.04330200 | -4.04828400 | 0.83777900  | H  | 5.00731200  | 2.05370500  | 0.97180500  |
| H  | -1.72261500 | -2.99051800 | 2.09701300  | C  | 2.52315500  | 2.05949100  | -1.77954600 |
| C  | -4.81430000 | 0.04804200  | -1.18187700 | H  | 3.35457700  | 2.47006400  | -2.37804300 |
| H  | -4.83990200 | 0.37789900  | -2.22855500 | H  | 1.67100700  | 1.92584900  | -2.45700600 |
| H  | -5.82250700 | -0.30753000 | -0.90895900 | H  | 2.25023100  | 2.81170300  | -1.03027800 |
| H  | -4.58059400 | 0.91239700  | -0.54468000 | C  | 4.94031800  | -1.23445000 | 1.33773300  |
| C  | -3.23390800 | -1.62205900 | -3.44971900 | H  | 5.09500600  | -2.31910500 | 1.26781900  |
| H  | -3.44596400 | -2.58575400 | -3.93864200 | H  | 5.92839300  | -0.74479000 | 1.34295400  |
| H  | -4.01363400 | -0.90569500 | -3.73736800 | H  | 4.44538200  | -1.01878300 | 2.29576500  |
| H  | -2.26508200 | -1.24999200 | -3.81837100 | C  | 3.81309100  | -2.88667900 | -1.21841500 |
| C  | -1.39200500 | -3.70465900 | -2.02048200 | H  | 4.24968100  | -3.05021900 | -2.21626400 |
| H  | -2.01484200 | -4.55260500 | -2.35274000 | H  | 4.44289800  | -3.39199900 | -0.47496600 |
| H  | -0.92109900 | -3.27327800 | -2.91462000 | H  | 2.81078400  | -3.34376700 | -1.19688700 |
| H  | -0.60386800 | -4.11087200 | -1.37312700 | C  | 2.31368700  | -0.88982300 | -3.08099100 |
| F  | -0.86925800 | -0.22437100 | -2.33058500 | H  | 3.10453800  | -0.98204600 | -3.84482800 |
| F  | -1.97199700 | 1.11880800  | -0.32621500 | H  | 1.79843200  | -1.85941900 | -3.02344400 |
| Cl | -3.85196800 | 2.53332900  | 1.25687400  | H  | 1.59823700  | -0.13701300 | -3.43733500 |
| C  | -1.80179400 | 1.94808700  | 1.12104000  | F  | 1.08325800  | -2.26390800 | -0.20096900 |
| O  | -1.48099300 | 1.20604300  | 1.99594900  | Cl | 1.79201700  | -0.59674700 | 2.36911600  |
| C  | -1.14810800 | 3.22054500  | 0.70319200  | N  | -2.22282200 | -0.92916300 | -1.49877900 |
| C  | -0.24009800 | 3.79209000  | 1.60032600  | C  | -3.38465400 | -0.26931300 | -1.19468000 |
| C  | -1.43091700 | 3.85624900  | -0.51322600 | N  | -2.43978600 | -2.27401500 | -1.48310600 |
| C  | 0.38173600  | 5.00280900  | 1.28443900  | C  | -4.31879400 | -1.31339500 | -1.00221600 |
| H  | -0.02032700 | 3.27901400  | 2.53726800  | C  | -3.74457000 | 1.08025800  | -1.05044200 |
| C  | -0.80164600 | 5.05802200  | -0.82717000 | N  | -3.67126600 | -2.51280200 | -1.20185300 |
| H  | -2.14295800 | 3.39839300  | -1.19818100 | C  | -5.65069700 | -1.03617900 | -0.64648500 |
| C  | 0.10344100  | 5.63687400  | 0.07265300  | C  | -5.06311800 | 1.33714400  | -0.69729300 |
| H  | 1.09457500  | 5.44396700  | 1.98468600  | H  | -3.03095300 | 1.88976600  | -1.18477800 |
| H  | -1.01612200 | 5.54997000  | -1.77873700 | H  | -6.36510300 | -1.84657800 | -0.49357500 |
| H  | 0.59324300  | 6.58126600  | -0.17644900 | C  | -6.00513500 | 0.29672300  | -0.49444200 |
|    |             |             |             | H  | -5.38340200 | 2.37317300  | -0.56672700 |
|    |             |             |             | H  | -7.02804700 | 0.55650500  | -0.21405100 |

### B<sub>Co-Cl</sub>

67

|    |             |             |             |
|----|-------------|-------------|-------------|
| C  | -0.86791500 | -0.45730400 | -1.63491300 |
| H  | -0.77671900 | 0.27552600  | -2.44795200 |
| H  | -0.26405100 | -1.34283300 | -1.86497300 |
| C  | -0.18496700 | 1.99305900  | -0.00330800 |
| P  | -0.07810800 | 0.17587000  | -0.05070500 |
| C  | 0.34262800  | 2.60785500  | 1.14812800  |
| C  | -0.64866000 | 2.79062600  | -1.05757200 |
| C  | -1.26925800 | -0.40664000 | 1.20873700  |
| C  | 0.37896500  | 3.99870500  | 1.24504000  |
| H  | 0.73569600  | 1.98462400  | 1.95538600  |
| C  | -0.60728600 | 4.18478000  | -0.95758000 |
| H  | -1.02964200 | 2.34039400  | -1.97486700 |
| C  | -2.19163800 | 0.46622600  | 1.80157200  |
| C  | -1.31950100 | -1.78059100 | 1.49661600  |
| H  | 0.78732300  | 4.46755500  | 2.14304200  |
| C  | -0.09688600 | 4.79058400  | 0.19282000  |
| H  | -0.97096500 | 4.79612900  | -1.78621800 |
| H  | -2.16671600 | 1.53299900  | 1.57965600  |
| C  | -3.16462900 | -0.03165300 | 2.67246000  |
| H  | -0.58591800 | -2.43870000 | 1.03049900  |
| C  | -2.30059300 | -2.27015200 | 2.35827300  |
| H  | -0.06380300 | 5.87966000  | 0.26880000  |
| H  | -3.88326600 | 0.65405400  | 3.12687600  |
| C  | -3.22502000 | -1.39973800 | 2.94692300  |
| H  | -2.34378300 | -3.34055000 | 2.57242500  |
| H  | -3.99240100 | -1.78919200 | 3.62019100  |
| Co | 1.98423500  | -0.63954800 | 0.09114400  |
| C  | 3.64825400  | 0.65045400  | 0.08679500  |
| C  | 4.11809000  | -0.72021400 | 0.20433500  |
| C  | 2.97341300  | 0.77948900  | -1.15864400 |

### Benzoyl chloride

14

|    |             |             |             |
|----|-------------|-------------|-------------|
| C  | 0.12633100  | 0.20278200  | -0.00002900 |
| C  | 0.56459400  | -1.13149100 | -0.00007000 |
| C  | 1.93035500  | -1.41394800 | -0.00004100 |
| C  | 2.86354400  | -0.37212700 | 0.00001500  |
| C  | 2.43174200  | 0.95982400  | 0.00005600  |
| C  | 1.06980600  | 1.24895000  | 0.00004700  |
| H  | -0.16504500 | -1.94043000 | -0.00011800 |
| H  | 2.26791100  | -2.45227200 | -0.00006800 |
| H  | 3.93229100  | -0.59828000 | 0.00002600  |
| H  | 3.16054000  | 1.77296000  | 0.00009800  |
| H  | 0.71651600  | 2.28095500  | 0.00008600  |
| C  | -1.30070200 | 0.59899600  | -0.00001600 |
| O  | -1.72493100 | 1.71292200  | -0.00009800 |
| Cl | -2.48392900 | -0.78377800 | 0.00005800  |

### Benzoyl fluoride

14

|   |             |             |             |
|---|-------------|-------------|-------------|
| C | -0.23557400 | 0.04265800  | -0.00013500 |
| C | 0.42822200  | -1.19549000 | -0.00020000 |
| C | 1.82252500  | -1.23184300 | -0.00008000 |
| C | 2.55444200  | -0.03949100 | 0.00008200  |
| C | 1.89448900  | 1.19565800  | 0.00013800  |
| C | 0.50223900  | 1.23931600  | 0.00003800  |
| H | -0.14966100 | -2.11979100 | -0.00033400 |
| H | 2.34105900  | -2.19277400 | -0.00012000 |
| H | 3.64641900  | -0.07221700 | 0.00016400  |
| H | 2.46929200  | 2.12401700  | 0.00026600  |
| H | -0.03113000 | 2.19128200  | 0.00008300  |



|   |             |             |             |
|---|-------------|-------------|-------------|
| C | -1.70852900 | 0.13438300  | -0.00022600 |
| O | -2.38316500 | 1.11777600  | -0.00013300 |
| F | -2.30639300 | -1.08265300 | 0.00036700  |

**<sup>3</sup>A<sub>Co-F</sub>**

67

|    |             |             |             |
|----|-------------|-------------|-------------|
| C  | -4.28291500 | -1.31936400 | -0.98870900 |
| C  | -0.82326000 | -0.51524800 | -1.61376700 |
| H  | -0.71312400 | 0.20213100  | -2.43787900 |
| H  | -0.21257100 | -1.40381400 | -1.81840700 |
| C  | -0.19020400 | 1.96297600  | 0.01415600  |
| N  | -2.40679000 | -2.31882700 | -1.40037300 |
| N  | -3.64266800 | -2.53271100 | -1.11757700 |
| P  | -0.08508400 | 0.15199200  | -0.02316800 |
| C  | -3.33937200 | -0.29439100 | -1.22965300 |
| C  | -5.61369100 | -1.01148800 | -0.65541200 |
| C  | 0.24135100  | 2.56449300  | 1.21213200  |
| C  | -0.55368600 | 2.76750800  | -1.07510500 |
| N  | -2.18142500 | -0.97843000 | -1.49090100 |
| C  | -1.24514200 | -0.45134400 | 1.24724900  |
| C  | -3.68419500 | 1.06452000  | -1.15570300 |
| C  | -5.95475000 | 0.33121900  | -0.57210900 |
| H  | -6.33741700 | -1.80559500 | -0.46552000 |
| C  | 0.25745600  | 3.95350500  | 1.32714400  |
| H  | 0.59742400  | 1.92220000  | 2.02119700  |
| C  | -0.51984600 | 4.16082800  | -0.95722300 |
| H  | -0.86313500 | 2.32553800  | -2.02339200 |
| C  | -2.23258800 | 0.38038300  | 1.79529300  |
| C  | -1.19290500 | -1.80930800 | 1.60229300  |
| H  | -2.96100100 | 1.85869700  | -1.32915400 |
| C  | -5.00178600 | 1.35145500  | -0.82141200 |
| H  | -6.97630800 | 0.61475900  | -0.31052100 |
| H  | 0.58693400  | 4.41499400  | 2.26068400  |
| C  | -0.12532400 | 4.75449900  | 0.24462800  |
| H  | -0.80646300 | 4.78124800  | -1.80902400 |
| H  | -2.28318200 | 1.43409900  | 1.52104000  |
| C  | -3.16929500 | -0.14492100 | 2.68807100  |
| H  | -0.41626700 | -2.43738600 | 1.16230100  |
| C  | -2.13609600 | -2.32575500 | 2.49180400  |
| H  | -5.31297900 | 2.39556700  | -0.74452000 |
| H  | -0.10570700 | 5.84279900  | 0.33510000  |
| H  | -3.94026300 | 0.50589200  | 3.10647600  |
| C  | -3.12536800 | -1.49848100 | 3.03371900  |
| H  | -2.09884800 | -3.38358000 | 2.76205300  |
| H  | -3.86321700 | -1.90937100 | 3.72691600  |
| Co | 1.98466500  | -0.64847900 | 0.29491100  |
| C  | 3.40323500  | 0.90786500  | -0.35845200 |
| C  | 4.11638000  | 0.04569100  | 0.49909300  |
| C  | 3.00215300  | 0.13826000  | -1.54963300 |
| C  | 4.06835100  | -1.27021000 | -0.08582200 |
| C  | 3.48010000  | -1.17563000 | -1.40109400 |
| C  | 3.24577600  | 2.38244500  | -0.18283700 |
| H  | 2.38677000  | 2.77772600  | -0.73946200 |
| H  | 3.11057400  | 2.64441200  | 0.87495900  |
| H  | 4.14649600  | 2.90848200  | -0.54615800 |
| C  | 2.34025800  | 0.73142500  | -2.75226900 |
| H  | 3.09027100  | 1.21396600  | -3.40283500 |
| H  | 1.82205800  | -0.02940600 | -3.35170800 |
| H  | 1.61611700  | 1.51052900  | -2.47509100 |
| C  | 4.65423700  | 0.41468800  | 1.84479000  |
| H  | 5.33073200  | -0.35645700 | 2.23844900  |
| H  | 5.20945100  | 1.36433900  | 1.80404800  |
| H  | 3.81181000  | 0.52977100  | 2.54593500  |
| C  | 4.58161900  | -2.54142400 | 0.50432000  |
| H  | 5.45653900  | -2.91208500 | -0.05646100 |
| H  | 4.87333500  | -2.41792500 | 1.55547700  |
| H  | 3.80263600  | -3.31798200 | 0.45014900  |
| C  | 3.25439700  | -2.34253700 | -2.30540000 |

|   |            |             |             |
|---|------------|-------------|-------------|
| H | 4.18772400 | -2.90238100 | -2.47624500 |
| H | 2.52377500 | -3.02333300 | -1.83933900 |
| H | 2.86191000 | -2.03056800 | -3.28308700 |
| F | 1.67881800 | -0.15522100 | 2.11397600  |
| F | 1.21596900 | -2.35015700 | -0.07060400 |

**<sup>3</sup>TS<sub>A-B</sub>**

81

|    |             |             |             |
|----|-------------|-------------|-------------|
| C  | 4.62460500  | -0.22916500 | -1.67954400 |
| C  | 1.40118400  | -1.80889100 | -1.31154400 |
| H  | 1.49040600  | -2.87887100 | -1.08258800 |
| H  | 0.76847400  | -1.67261200 | -2.19697100 |
| C  | 0.77969700  | -1.77332600 | 1.61603700  |
| N  | 2.78790700  | -0.51086700 | -2.79021900 |
| N  | 3.93380900  | 0.07000200  | -2.83361100 |
| P  | 0.44768900  | -0.91132000 | 0.04482900  |
| C  | 3.81542900  | -1.07559900 | -0.88710200 |
| C  | 5.89241800  | 0.18404000  | -1.23374100 |
| C  | 0.33698500  | -1.16387400 | 2.80511900  |
| C  | 1.35624400  | -3.05201000 | 1.67712900  |
| N  | 2.67681000  | -1.22513000 | -1.63502300 |
| C  | 1.30726400  | 0.69204000  | 0.10605500  |
| C  | 4.24051700  | -1.54635900 | 0.36565400  |
| C  | 6.30984400  | -0.27136100 | 0.00894400  |
| H  | 6.51026500  | 0.84168800  | -1.84715500 |
| C  | 0.49638800  | -1.81632800 | 4.02897000  |
| H  | -0.14298200 | -0.18592800 | 2.76382700  |
| C  | 1.50992600  | -3.70084900 | 2.90479500  |
| H  | 1.68399000  | -3.56604800 | 0.77368400  |
| C  | 2.22648300  | 1.02307300  | 1.11175000  |
| C  | 1.11971000  | 1.55159000  | -0.98887700 |
| H  | 3.62070700  | -2.19059500 | 0.98536900  |
| C  | 5.49395400  | -1.12638700 | 0.79271600  |
| H  | 7.28549600  | 0.02966600  | 0.39620500  |
| H  | 0.15265700  | -1.33074300 | 4.94496600  |
| C  | 1.08354300  | -3.08457900 | 4.08382400  |
| H  | 1.96244200  | -4.69427000 | 2.93522000  |
| H  | 2.38258600  | 0.35666000  | 1.95992000  |
| C  | 2.96605200  | 2.20231800  | 1.01279000  |
| H  | 0.39996100  | 1.28083800  | -1.76231800 |
| C  | 1.87582200  | 2.71863900  | -1.08659800 |
| H  | 5.86141700  | -1.46239600 | 1.76487900  |
| H  | 1.20344600  | -3.59374700 | 5.04262300  |
| H  | 3.68403600  | 2.45642400  | 1.79560900  |
| C  | 2.79863500  | 3.04458500  | -0.09002400 |
| H  | 1.73106300  | 3.38427100  | -1.93902100 |
| H  | 3.38149300  | 3.96491800  | -0.16684600 |
| Co | -1.69904000 | -0.75243300 | -0.85695100 |
| C  | -3.38389300 | -1.54355000 | 0.39081100  |
| C  | -3.90621600 | -1.04996400 | -0.81510900 |
| C  | -2.49262200 | -2.66403400 | 0.06890900  |
| C  | -3.31253000 | -1.82761900 | -1.89862200 |
| C  | -2.47757400 | -2.84318600 | -1.33837000 |
| C  | -3.68855800 | -1.08935200 | 1.77942700  |
| H  | -2.77825800 | -1.06406600 | 2.39495600  |
| H  | -4.11280900 | -0.07800400 | 1.78610500  |
| H  | -4.40107000 | -1.78024200 | 2.26310400  |
| C  | -1.90459200 | -3.57450100 | 1.08801500  |
| H  | -2.67796800 | -4.30262500 | 1.39171600  |
| H  | -1.04997700 | -4.14137300 | 0.69945100  |
| H  | -1.59068900 | -3.03852800 | 1.99196000  |
| C  | -4.87173000 | 0.07510300  | -0.99174500 |
| H  | -4.68228700 | 0.61691400  | -1.92937200 |
| H  | -5.90705000 | -0.30499500 | -1.03271400 |
| H  | -4.79113400 | 0.79771600  | -0.17045900 |
| C  | -3.52909300 | -1.63073800 | -3.35840400 |
| H  | -3.91566300 | -2.55370900 | -3.82006600 |
| H  | -4.23242900 | -0.81456500 | -3.56534600 |

|    |             |             |             |    |             |             |             |
|----|-------------|-------------|-------------|----|-------------|-------------|-------------|
| H  | -2.56537000 | -1.39072000 | -3.83656800 | H  | -0.02223200 | 5.87275300  | 0.26538200  |
| C  | -1.69358100 | -3.84783700 | -2.12174000 | H  | -3.86803300 | 0.54714300  | 3.23560900  |
| H  | -2.33440300 | -4.67957300 | -2.46063300 | C  | -3.21209400 | -1.49722200 | 2.96190400  |
| H  | -1.25089700 | -3.38944300 | -3.01855400 | H  | -2.34271200 | -3.42285800 | 2.49275900  |
| H  | -0.87880100 | -4.28048500 | -1.52399600 | H  | -3.95631100 | -1.91121900 | 3.64638100  |
| F  | -0.87118900 | -0.37961600 | -2.48864600 | Co | 1.95312500  | -0.72291000 | 0.17006600  |
| F  | -2.00275100 | 1.16179100  | -0.22596400 | C  | 3.88354400  | 0.62264000  | 0.08459500  |
| Cl | -3.75959100 | 2.57802400  | 1.43267700  | C  | 4.17546400  | -0.80532800 | 0.14228500  |
| C  | -1.77494400 | 2.07488200  | 1.21252900  | C  | 3.12157600  | 0.85158800  | -1.06371300 |
| O  | -1.36165300 | 1.36692800  | 2.08107800  | C  | 3.68224500  | -1.42497000 | -1.05111200 |
| C  | -1.13779600 | 3.31681500  | 0.68036400  | C  | 2.95164400  | -0.43943800 | -1.75738700 |
| C  | -0.16852300 | 3.92880400  | 1.48140200  | C  | 4.29771700  | 1.61118600  | 1.12383700  |
| C  | -1.49254700 | 3.88500600  | -0.55048700 | H  | 3.89446900  | 2.61066500  | 0.91211300  |
| C  | 0.44111400  | 5.11245900  | 1.05704200  | H  | 3.93344700  | 1.29843600  | 2.11469100  |
| H  | 0.10791600  | 3.46740200  | 2.43022300  | H  | 5.39642300  | 1.69109200  | 1.17875200  |
| C  | -0.87468200 | 5.05916000  | -0.97437400 | C  | 2.67314700  | 2.17211300  | -1.59555400 |
| H  | -2.24774600 | 3.39312900  | -1.16189900 | H  | 3.46777800  | 2.60746500  | -2.22653100 |
| C  | 0.09085300  | 5.67878400  | -0.16960300 | H  | 1.77715300  | 2.08323200  | -2.22137700 |
| H  | 1.20104200  | 5.58501400  | 1.68349700  | H  | 2.45230500  | 2.88712100  | -0.79232700 |
| H  | -1.14517100 | 5.49699500  | -1.93813900 | C  | 4.98152400  | -1.44015500 | 1.22325400  |
| H  | 0.57137900  | 6.60122200  | -0.50447800 | H  | 4.99129100  | -2.53464600 | 1.13886700  |

### <sup>3</sup>B<sub>Co-Cl</sub>

|    |             |             |             |    |             |             |             |
|----|-------------|-------------|-------------|----|-------------|-------------|-------------|
| 67 |             |             |             | H  | 6.02440800  | -1.08142400 | 1.18087100  |
| C  | -0.93591600 | -0.44002000 | -1.65391400 | H  | 4.57500700  | -1.17155900 | 2.20972700  |
| H  | -0.83435600 | 0.30055500  | -2.45842800 | C  | 3.77774300  | -2.86491500 | -1.44283000 |
| H  | -0.33947100 | -1.33109100 | -1.88530600 | H  | 4.22625600  | -2.97453500 | -2.44335300 |
| C  | -0.22356500 | 1.98687500  | -0.00185000 | H  | 4.38875100  | -3.43874500 | -0.73312900 |
| P  | -0.14732700 | 0.16812700  | -0.06201200 | H  | 2.76685200  | -3.30035100 | -1.45969900 |
| C  | 0.30885100  | 2.59384300  | 1.15186100  | C  | 2.29464200  | -0.65016300 | -3.08143000 |
| C  | -0.65776900 | 2.79433000  | -1.06276300 | H  | 3.04645700  | -0.62878100 | -3.88988900 |
| C  | -1.31866400 | -0.44030700 | 1.19784000  | H  | 1.80000900  | -1.63092700 | -3.11805800 |
| C  | 0.37243700  | 3.98400200  | 1.24723200  | H  | 1.55047900  | 0.12434600  | -3.30905300 |
| H  | 0.68876300  | 1.96761500  | 1.96261900  | F  | 1.00682100  | -2.32985700 | -0.38961200 |
| C  | -0.58751600 | 4.18716500  | -0.96438000 | Cl | 1.83099300  | -0.50502500 | 2.43542100  |
| H  | -1.04105500 | 2.35206500  | -1.98301800 | N  | -2.29760800 | -0.89285200 | -1.52106100 |
| C  | -2.22013100 | 0.41147600  | 1.84998300  | C  | -3.44399300 | -0.21968300 | -1.18839800 |
| C  | -1.35511500 | -1.82411800 | 1.43825000  | N  | -2.54133900 | -2.23291000 | -1.54503700 |
| H  | 0.78326900  | 4.44500600  | 2.14817700  | C  | -4.39796300 | -1.25008500 | -1.02242200 |
| C  | -0.07722700 | 4.78449300  | 0.19052400  | C  | -3.77425400 | 1.13172700  | -0.99799900 |
| H  | -0.92994700 | 4.80424400  | -1.79783800 | N  | -3.77588000 | -2.45551500 | -1.26309600 |
| H  | -2.20064300 | 1.48538100  | 1.66277300  | C  | -5.72202000 | -0.95694300 | -0.65058300 |
| C  | -3.16322400 | -0.11947400 | 2.73361700  | C  | -5.08535800 | 1.40430700  | -0.62895500 |
| H  | -0.63863200 | -2.46437300 | 0.91968600  | H  | -3.04425800 | 1.92997800  | -1.11051000 |
| C  | -2.30704100 | -2.34570400 | 2.31427200  | H  | -6.45238500 | -1.75682100 | -0.51914000 |
|    |             |             |             | C  | -6.04785300 | 0.37756600  | -0.45453500 |
|    |             |             |             | H  | -5.38327700 | 2.44195700  | -0.46308900 |
|    |             |             |             | H  | -7.06376100 | 0.64931200  | -0.16034800 |

### Structures optimized at the TPSSh (PCM = dichloromethane)/def2-SVP level of theory

#### A<sub>Co-F</sub>

|    |             |             |             |   |             |             |             |
|----|-------------|-------------|-------------|---|-------------|-------------|-------------|
| 67 |             |             |             | C | -3.87297700 | 1.16930200  | -1.54237400 |
| C  | -4.48182200 | -1.16361800 | -1.03584400 | C | -6.21258500 | 0.46663700  | -1.25407000 |
| C  | -0.94789200 | -0.43560000 | -1.39694100 | H | -6.59766800 | -1.62855700 | -0.81794900 |
| H  | -0.87222800 | 0.33785500  | -2.17324900 | C | -0.01518000 | 3.58464600  | 2.20986400  |
| H  | -0.38311800 | -1.32402900 | -1.71245500 | H | 0.52335500  | 1.51192700  | 2.52571200  |
| C  | -0.30392500 | 1.82699600  | 0.54886000  | C | -0.90321300 | 4.12703600  | 0.02320900  |
| N  | -2.56744300 | -2.17112100 | -0.98638000 | H | -1.08440600 | 2.49660000  | -1.36810700 |
| N  | -3.83518500 | -2.36645100 | -0.86037800 | C | -2.05519600 | -0.27543400 | 2.04963500  |
| P  | -0.00158800 | 0.06526300  | 0.15583700  | C | -0.45862200 | -2.10479600 | 1.89254400  |
| C  | -3.51046600 | -0.16579000 | -1.28853500 | H | -3.13927500 | 1.94593100  | -1.75125400 |
| C  | -5.85488600 | -0.85360600 | -1.01352800 | C | -5.23351000 | 1.45903300  | -1.51727700 |
| C  | 0.10272500  | 2.24535900  | 1.83335000  | H | -7.26645800 | 0.75308900  | -1.24681900 |
| C  | -0.79178400 | 2.78347900  | -0.35666400 | H | 0.29589200  | 3.89389400  | 3.21042500  |
| N  | -2.32455900 | -0.85669300 | -1.24383600 | C | -0.52265400 | 4.52870700  | 1.30729200  |
| C  | -0.89434900 | -0.83269400 | 1.48260300  | H | -1.29162100 | 4.85828400  | -0.68937900 |
|    |             |             |             | H | -2.40386300 | 0.71282300  | 1.74112800  |
|    |             |             |             | C | -2.76977700 | -0.98217400 | 3.02299100  |

|    |             |             |             |    |             |             |             |
|----|-------------|-------------|-------------|----|-------------|-------------|-------------|
| H  | 0.43430000  | -2.51925700 | 1.42561300  | H  | 2.18171300  | 0.89834400  | 2.09573200  |
| C  | -1.17695300 | -2.80093500 | 2.86877700  | C  | 2.29900800  | 2.87866400  | 1.25275000  |
| H  | -5.55901900 | 2.48408500  | -1.70869000 | H  | 0.06890600  | 1.49642600  | -1.62552200 |
| H  | -0.61547100 | 5.57610800  | 1.60346800  | C  | 1.13941500  | 3.22150700  | -0.84551600 |
| H  | -3.67033200 | -0.54227000 | 3.45818400  | H  | 6.44970400  | -0.49824300 | 1.64761900  |
| C  | -2.32998200 | -2.24456700 | 3.43566300  | H  | 1.91158400  | -3.07573300 | 5.18779800  |
| H  | -0.83313800 | -3.78784500 | 3.18861900  | H  | 2.92296300  | 3.25730100  | 2.06583500  |
| H  | -2.88646000 | -2.79453100 | 4.19880700  | C  | 1.93882700  | 3.71532900  | 0.19085600  |
| Co | 2.14057200  | -0.51108400 | -0.07428300 | H  | 0.84965600  | 3.87348900  | -1.67229300 |
| C  | 3.40280900  | 1.09007700  | -0.30166700 | H  | 2.27935900  | 4.75343300  | 0.17322700  |
| C  | 4.18261200  | -0.06835600 | 0.07283700  | Co | -1.43921900 | -1.17404400 | -0.77210400 |
| C  | 2.76934900  | 0.79819700  | -1.56758500 | C  | -2.91573800 | -2.28041300 | 0.19617600  |
| C  | 3.95911600  | -1.08937700 | -0.89213500 | C  | -3.36765000 | -1.91216300 | -1.13879500 |
| C  | 3.07019400  | -0.55564400 | -1.90954600 | C  | -1.74280000 | -3.07601300 | 0.05790200  |
| C  | 3.40671200  | 2.40025100  | 0.42418200  | C  | -2.45380700 | -2.45908500 | -2.07822700 |
| H  | 2.53852500  | 3.01670600  | 0.15393500  | C  | -1.39781000 | -3.12445400 | -1.34677500 |
| H  | 3.38715400  | 2.24452100  | 1.51222600  | C  | -3.64505900 | -2.00711700 | 1.47267600  |
| H  | 4.31794300  | 2.97489400  | 0.18203800  | H  | -2.96738000 | -2.03967300 | 2.33631100  |
| C  | 2.02202200  | 1.78213200  | -2.41354100 | H  | -4.13590400 | -1.02444400 | 1.45299000  |
| H  | 2.74401400  | 2.35191600  | -3.02350400 | H  | -4.41960100 | -2.78053400 | 1.62087200  |
| H  | 1.32621500  | 1.28847600  | -3.10600900 | C  | -1.08093100 | -3.84649000 | 1.15392000  |
| H  | 1.46423500  | 2.50764900  | -1.80615800 | H  | -1.65432600 | -4.77679700 | 1.31121600  |
| C  | 4.94718700  | -0.18651500 | 1.35139200  | H  | -0.05196700 | -4.13021600 | 0.90167500  |
| H  | 5.53699000  | -1.11224400 | 1.38841900  | H  | -1.07052500 | -3.29686500 | 2.10430500  |
| H  | 5.62872000  | 0.66885200  | 1.47918300  | C  | -4.59151300 | -1.11176500 | -1.44024100 |
| H  | 4.22761000  | -0.19499800 | 2.18673600  | H  | -4.58491500 | -0.73895200 | -2.47318700 |
| C  | 4.43701000  | -2.50637700 | -0.86248600 | H  | -5.48639700 | -1.74486900 | -1.31055900 |
| H  | 5.00479800  | -2.74989600 | -1.77507800 | H  | -4.67595100 | -0.25725700 | -0.75350700 |
| H  | 5.07775400  | -2.70217600 | 0.00778800  | C  | -2.47141400 | -2.29443000 | -3.56236800 |
| H  | 3.56222900  | -3.17475500 | -0.81091200 | H  | -2.42238700 | -3.27771100 | -4.05650700 |
| C  | 2.59130700  | -1.33416100 | -3.09417000 | H  | -3.37798100 | -1.77785700 | -3.90272500 |
| H  | 3.42338800  | -1.53562800 | -3.78957300 | H  | -1.59479300 | -1.70274300 | -3.86976800 |
| H  | 2.18094200  | -2.29818500 | -2.75821000 | C  | -0.30574400 | -3.93307700 | -1.97601200 |
| H  | 1.80916800  | -0.79724700 | -3.64845900 | H  | -0.71132000 | -4.90575000 | -2.30472000 |
| F  | 2.06308500  | -0.65563100 | 1.78316100  | H  | 0.10774900  | -3.43296600 | -2.86283800 |
| F  | 1.39323600  | -2.21715600 | -0.36485800 | H  | 0.51221000  | -4.14037300 | -1.27288500 |

### TS<sub>A-B</sub>

|    |             |             |             |
|----|-------------|-------------|-------------|
| 81 |             |             |             |
| C  | 4.84955300  | 0.66278900  | -1.66931000 |
| C  | 1.85055700  | -1.32370100 | -1.20594700 |
| H  | 2.17567200  | -2.35086900 | -0.99380600 |
| H  | 1.23268900  | -1.30555100 | -2.11316200 |
| C  | 1.12409700  | -1.47544500 | 1.70747200  |
| N  | 2.97801400  | 0.22360800  | -2.66160100 |
| N  | 4.06634000  | 0.90231300  | -2.77640200 |
| P  | 0.62954300  | -0.72637700 | 0.10835400  |
| C  | 4.16315900  | -0.23886100 | -0.82168400 |
| C  | 6.12316800  | 1.15670100  | -1.32949800 |
| C  | 0.48420700  | -1.00562700 | 2.87321400  |
| C  | 2.02897600  | -2.54668100 | 1.81497700  |
| N  | 2.99153100  | -0.48238600 | -1.49539500 |
| C  | 1.07029400  | 1.04913700  | 0.23163000  |
| C  | 4.72103700  | -0.67968000 | 0.39203600  |
| C  | 6.67438900  | 0.72154800  | -0.13137700 |
| H  | 6.64530700  | 1.85158600  | -1.98909700 |
| C  | 0.77345700  | -1.57579900 | 4.11627500  |
| H  | -0.24863900 | -0.19884700 | 2.80265900  |
| C  | 2.31103100  | -3.11724700 | 3.06174000  |
| H  | 2.51832100  | -2.96053800 | 0.93148300  |
| C  | 1.87460700  | 1.54621200  | 1.27300100  |
| C  | 0.69501400  | 1.89694400  | -0.82673800 |
| H  | 4.20087200  | -1.36551100 | 1.05896900  |
| C  | 5.98025400  | -0.18268800 | 0.71301300  |
| H  | 7.66061200  | 1.07843400  | 0.17330700  |
| H  | 0.27503300  | -1.19586700 | 5.01104400  |
| C  | 1.68916100  | -2.63041900 | 4.21542500  |
| H  | 3.01899000  | -3.94662900 | 3.12580400  |

### B<sub>Co-Cl</sub>

|    |             |             |             |
|----|-------------|-------------|-------------|
| 67 |             |             |             |
| C  | -0.96785200 | -0.47443300 | -1.45358900 |
| H  | -0.91611400 | 0.24226600  | -2.28490900 |
| H  | -0.36809700 | -1.36302100 | -1.69042100 |
| C  | -0.26224200 | 2.00375200  | 0.15395500  |
| P  | -0.06817800 | 0.18457500  | 0.07020900  |
| C  | 0.25643000  | 2.62636800  | 1.30879200  |
| C  | -0.78374000 | 2.80375400  | -0.87593500 |
| C  | -1.11592100 | -0.45182100 | 1.44034400  |
| C  | 0.21826800  | 4.01672000  | 1.43854900  |
| H  | 0.69818300  | 2.01091200  | 2.09775900  |
| C  | -0.81700600 | 4.19753300  | -0.74303700 |
| H  | -1.15718700 | 2.35599700  | -1.79881600 |
| C  | -2.09606500 | 0.35881800  | 2.03823500  |

|    |             |             |             |
|----|-------------|-------------|-------------|
| C  | -0.98071700 | -1.79307800 | 1.84390600  |
| H  | 0.61627300  | 4.48614800  | 2.34116100  |
| C  | -0.32237800 | 4.80580800  | 0.41455200  |
| H  | -1.22949700 | 4.80610300  | -1.55099300 |
| H  | -2.21761400 | 1.39968100  | 1.73240500  |
| C  | -2.92571800 | -0.16394800 | 3.03754200  |
| H  | -0.21316500 | -2.40400900 | 1.36677100  |
| C  | -1.81810100 | -2.30775100 | 2.83656800  |
| H  | -0.35123200 | 5.89301400  | 0.51713400  |
| H  | -3.68192200 | 0.47561800  | 3.49904900  |
| C  | -2.78843700 | -1.49641300 | 3.43815200  |
| H  | -1.70792200 | -3.34996500 | 3.14614500  |
| H  | -3.43712400 | -1.90312200 | 4.21797900  |
| Co | 2.04786500  | -0.57640600 | -0.01801200 |
| C  | 3.71601400  | 0.65769300  | -0.11045500 |
| C  | 4.14335600  | -0.73402700 | -0.08058500 |
| C  | 2.92285100  | 0.85124800  | -1.28115700 |
| C  | 3.57352600  | -1.38704500 | -1.20552000 |
| C  | 2.76934300  | -0.42819100 | -1.93177200 |
| C  | 4.15849800  | 1.70763800  | 0.85969800  |
| H  | 3.53900400  | 2.61181500  | 0.78667900  |
| H  | 4.09460400  | 1.32751200  | 1.88902400  |
| H  | 5.20474000  | 1.99391000  | 0.65610900  |
| C  | 2.45616700  | 2.17088900  | -1.80965500 |
| H  | 3.26856500  | 2.61344900  | -2.41212600 |
| H  | 1.57938500  | 2.07364900  | -2.46284800 |
| H  | 2.21426500  | 2.87838200  | -1.00576700 |
| C  | 5.05338600  | -1.32196900 | 0.94998600  |
| H  | 5.13375400  | -2.41210200 | 0.84424700  |
| H  | 6.06360300  | -0.89039600 | 0.84993400  |
| H  | 4.67889800  | -1.09790400 | 1.96007600  |
| C  | 3.65403700  | -2.83858900 | -1.55058000 |
| H  | 4.00380100  | -2.97199300 | -2.58662300 |
| H  | 4.33426200  | -3.38010900 | -0.88024000 |
| H  | 2.64778200  | -3.27819100 | -1.45876600 |
| C  | 2.09807500  | -0.70523300 | -3.24230200 |
| H  | 2.84727000  | -0.72114500 | -4.05300300 |
| H  | 1.60061100  | -1.68574700 | -3.23612100 |
| H  | 1.35471400  | 0.06230500  | -3.49685200 |
| F  | 1.11382900  | -2.19843000 | -0.18839200 |
| Cl | 2.07734400  | -0.55796400 | 2.26803900  |
| N  | -2.32238300 | -0.95678100 | -1.28307900 |
| C  | -3.53294100 | -0.31599000 | -1.18548600 |
| N  | -2.50895700 | -2.30425000 | -1.20157800 |
| C  | -4.45723500 | -1.37807500 | -1.04103700 |
| C  | -3.95251500 | 1.02635600  | -1.21511800 |
| N  | -3.76195900 | -2.56633800 | -1.05885200 |
| C  | -5.83764000 | -1.13158800 | -0.91766000 |
| C  | -5.31963200 | 1.25315800  | -1.09216600 |
| H  | -3.25368000 | 1.85467900  | -1.31902100 |
| H  | -6.54279900 | -1.95679600 | -0.80643300 |
| C  | -6.25152600 | 0.19376000  | -0.94495300 |
| H  | -5.68776900 | 2.28156500  | -1.10828700 |
| H  | -7.31319800 | 0.43261500  | -0.85227100 |

### Benzoyl chloride

|    |             |             |             |
|----|-------------|-------------|-------------|
| 14 |             |             |             |
| C  | -0.12650600 | 0.20526600  | -0.00002900 |
| C  | -0.56159500 | -1.13200800 | 0.00000700  |
| C  | -1.92817500 | -1.41673800 | 0.00000800  |
| C  | -2.86377000 | -0.37482100 | -0.00002700 |
| C  | -2.43454600 | 0.95950900  | -0.00006200 |
| C  | -1.07190500 | 1.25221800  | -0.00006300 |
| H  | 0.17236100  | -1.93828600 | 0.00003300  |
| H  | -2.26458900 | -2.45549700 | 0.00003600  |
| H  | -3.93218500 | -0.60279300 | -0.00002600 |
| H  | -3.16514900 | 1.77110700  | -0.00009000 |
| H  | -0.71964800 | 2.28506100  | -0.00009000 |

|    |            |             |             |
|----|------------|-------------|-------------|
| C  | 1.29810700 | 0.60366500  | -0.00003300 |
| O  | 1.72914700 | 1.71792500  | -0.00000500 |
| Cl | 2.48272800 | -0.78738500 | 0.00008100  |

### Benzoyl fluoride

|    |             |             |             |
|----|-------------|-------------|-------------|
| 14 |             |             |             |
| C  | 0.23592700  | 0.04300500  | -0.00000200 |
| C  | -0.42808700 | -1.19710100 | 0.00006100  |
| C  | -1.82386400 | -1.23313600 | 0.00003200  |
| C  | -2.55626400 | -0.03925700 | -0.00006300 |
| C  | -1.89587500 | 1.19733300  | -0.00012700 |
| C  | -0.50210900 | 1.24149100  | -0.00009600 |
| H  | 0.15077400  | -2.12126200 | 0.00013200  |
| H  | -2.34269000 | -2.19401800 | 0.00008400  |
| H  | -3.64831400 | -0.07189200 | -0.00008600 |
| H  | -2.47104000 | 2.12559300  | -0.00020200 |
| H  | 0.03164900  | 2.19367100  | -0.00014300 |
| C  | 1.70857500  | 0.13511000  | 0.00003200  |
| O  | 2.38704500  | 1.12036100  | 0.00002400  |
| F  | 2.30593900  | -1.08662800 | 0.00011200  |

### <sup>3</sup>A<sub>Co-F</sub>

|    |             |             |             |
|----|-------------|-------------|-------------|
| 67 |             |             |             |
| C  | -4.51226900 | -1.23577300 | -1.11654500 |
| C  | -0.98314000 | -0.47385200 | -1.46367900 |
| H  | -0.88552500 | 0.26772300  | -2.26924900 |
| H  | -0.41204200 | -1.37265900 | -1.73552000 |
| C  | -0.34670400 | 1.87863900  | 0.34933400  |
| N  | -2.60276700 | -2.24337200 | -1.25814900 |
| N  | -3.86815200 | -2.45256900 | -1.13298200 |
| P  | -0.08549100 | 0.09072300  | 0.09430200  |
| C  | -3.54161200 | -0.21344600 | -1.24226300 |
| C  | -5.88223000 | -0.92946300 | -1.01015700 |
| C  | -0.01464200 | 2.39317200  | 1.61977400  |
| C  | -0.71544700 | 2.76917100  | -0.67524800 |
| N  | -2.35893700 | -0.90517200 | -1.33003800 |
| C  | -1.01500000 | -0.75194300 | 1.42814700  |
| C  | -3.90046600 | 1.14641600  | -1.26954900 |
| C  | -6.23697700 | 0.41306200  | -1.03461200 |
| H  | -6.62467600 | -1.72322700 | -0.91395300 |
| C  | -0.10144000 | 3.76511600  | 1.86714000  |
| H  | 0.33665000  | 1.70581700  | 2.39215400  |
| C  | -0.79167900 | 4.14416000  | -0.42281700 |
| H  | -0.94228500 | 2.40658000  | -1.68003800 |
| C  | -2.10594400 | -0.13323200 | 2.06238600  |
| C  | -0.65017800 | -2.06222800 | 1.78700500  |
| H  | -3.16410100 | 1.94337400  | -1.36079900 |
| C  | -5.25799800 | 1.43187800  | -1.16303000 |
| H  | -7.28834400 | 0.69770200  | -0.95457200 |
| H  | 0.14900200  | 4.15121900  | 2.85805600  |
| C  | -0.49458900 | 4.64369700  | 0.84958000  |
| H  | -1.08651600 | 4.82372500  | -1.22568500 |
| H  | -2.40226800 | 0.88207500  | 1.79038900  |
| C  | -2.81718000 | -0.81471300 | 3.05675300  |
| H  | 0.18433600  | -2.53753900 | 1.26831500  |
| C  | -1.36703800 | -2.73516200 | 2.77973900  |
| H  | -5.58106700 | 2.47532600  | -1.17813600 |
| H  | -0.56023400 | 5.71641800  | 1.04547000  |
| H  | -3.66225100 | -0.32557400 | 3.54709800  |
| C  | -2.44742200 | -2.11412400 | 3.41873100  |
| H  | -1.07868700 | -3.75212000 | 3.05684400  |
| H  | -3.00225200 | -2.64381500 | 4.19706700  |
| Co | 2.08733500  | -0.59937700 | 0.05917200  |
| C  | 3.40903000  | 1.05595800  | -0.32638900 |
| C  | 4.18023000  | 0.05253500  | 0.32616100  |
| C  | 2.99921000  | 0.54380800  | -1.64497800 |
| C  | 4.10931600  | -1.12049600 | -0.49112500 |
| C  | 3.46151800  | -0.77679000 | -1.75223300 |

|   |            |             |             |
|---|------------|-------------|-------------|
| C | 3.22294000 | 2.45470000  | 0.17066900  |
| H | 2.36982700 | 2.95369200  | -0.30879400 |
| H | 3.05744600 | 2.45959700  | 1.25688000  |
| H | 4.12493100 | 3.05705400  | -0.03873900 |
| C | 2.33049500 | 1.36118700  | -2.70870800 |
| H | 3.08554400 | 1.93460800  | -3.27455000 |
| H | 1.78351500 | 0.73282100  | -3.42574800 |
| H | 1.62956400 | 2.09172000  | -2.27981200 |
| C | 4.78994400 | 0.18211600  | 1.68868100  |
| H | 5.38057900 | -0.70639300 | 1.95220700  |
| H | 5.45463600 | 1.05942800  | 1.74076600  |
| H | 3.98620900 | 0.30200900  | 2.43229500  |
| C | 4.66075200 | -2.47802700 | -0.18777100 |
| H | 5.48719200 | -2.72645100 | -0.87506900 |
| H | 5.03622200 | -2.54566800 | 0.84202300  |
| H | 3.87474300 | -3.23769300 | -0.32235800 |
| C | 3.22764100 | -1.75172700 | -2.86226700 |
| H | 4.17771700 | -2.18211000 | -3.21935300 |
| H | 2.59640000 | -2.57867000 | -2.49761000 |
| H | 2.72367800 | -1.28094300 | -3.71756400 |
| F | 1.81134500 | -0.16284300 | 1.93436300  |
| F | 1.38095100 | -2.26890400 | -0.40796000 |

### <sup>3</sup>TS<sub>A-B</sub>

|    |             |             |             |
|----|-------------|-------------|-------------|
| 81 |             |             |             |
| C  | 4.97061000  | 1.30051700  | -1.57314800 |
| C  | 2.15879600  | -0.96064000 | -1.20511100 |
| H  | 2.56728500  | -1.96133600 | -1.00716600 |
| H  | 1.56164000  | -0.98665200 | -2.12659400 |
| C  | 1.42256100  | -1.09582900 | 1.72667500  |
| N  | 3.10825800  | 0.79108800  | -2.54882500 |
| N  | 4.13024700  | 1.56996100  | -2.63028300 |
| P  | 0.86758900  | -0.48594800 | 0.09190300  |
| C  | 4.39446400  | 0.26921500  | -0.79362900 |
| C  | 6.21024500  | 1.87043300  | -1.22729800 |
| C  | 0.75683900  | -0.60146300 | 2.86830600  |
| C  | 2.39354900  | -2.10183700 | 1.88627700  |
| N  | 3.22434000  | -0.01468500 | -1.45525200 |
| C  | 1.02655700  | 1.33616100  | 0.13910700  |
| C  | 5.03484300  | -0.23152800 | 0.35441400  |
| C  | 6.84159600  | 1.37764800  | -0.09273100 |
| H  | 6.64647400  | 2.66507700  | -1.83455600 |
| C  | 1.08683200  | -1.08416800 | 4.13800000  |
| H  | -0.02096700 | 0.15915100  | 2.76097300  |
| C  | 2.71662500  | -2.58160400 | 3.16068600  |
| H  | 2.90418100  | -2.53185600 | 1.02285900  |
| C  | 1.85448500  | 1.98348100  | 1.07277000  |
| C  | 0.35854500  | 2.08686700  | -0.84424500 |
| H  | 4.60227400  | -1.01925900 | 0.96875700  |
| C  | 6.25920100  | 0.34235400  | 0.68255300  |
| H  | 7.80512700  | 1.78997600  | 0.21445700  |
| H  | 0.56844500  | -0.68701100 | 5.01373000  |
| C  | 2.06851900  | -2.07082800 | 4.28956700  |
| H  | 3.47741400  | -3.35830700 | 3.26613900  |
| H  | 2.38111300  | 1.41030600  | 1.83827200  |
| C  | 2.00573500  | 3.37278300  | 1.02496600  |
| H  | -0.26941800 | 1.57169700  | -1.57242500 |
| C  | 0.52174400  | 3.47420200  | -0.88796800 |
| H  | 6.78933000  | -0.01597900 | 1.56794700  |
| H  | 2.32292500  | -2.44500400 | 5.28384600  |
| H  | 2.64877200  | 3.87070300  | 1.75448300  |
| C  | 1.34110300  | 4.11926000  | 0.04537500  |
| H  | 0.00090000  | 4.05359500  | -1.65360700 |
| H  | 1.46277400  | 5.20460800  | 0.00971600  |
| Co | -1.17867500 | -1.23877400 | -0.85139200 |
| C  | -2.09377700 | -2.85015900 | 0.25013700  |
| C  | -3.01030600 | -2.42707100 | -0.75470900 |
| C  | -0.92842200 | -3.46192900 | -0.41390300 |

|    |             |             |             |
|----|-------------|-------------|-------------|
| C  | -2.35055300 | -2.60525300 | -2.01694200 |
| C  | -1.08951900 | -3.31023600 | -1.79786300 |
| C  | -2.34458000 | -2.85422700 | 1.72442500  |
| H  | -1.40501800 | -2.82030900 | 2.29380600  |
| H  | -2.96328300 | -1.99472900 | 2.02040200  |
| H  | -2.87439400 | -3.78006100 | 2.01197800  |
| C  | 0.12734800  | -4.24494500 | 0.29740100  |
| H  | -0.26812500 | -5.24924900 | 0.53047000  |
| H  | 1.02890100  | -4.37776900 | -0.31613300 |
| H  | 0.41422200  | -3.78280500 | 1.25137600  |
| C  | -4.38788700 | -1.88644700 | -0.53327400 |
| H  | -4.72732500 | -1.29126800 | -1.39259200 |
| H  | -5.10036800 | -2.71996800 | -0.40552100 |
| H  | -4.42827000 | -1.25417800 | 0.36478200  |
| C  | -2.86520500 | -2.23692300 | -3.36922400 |
| H  | -2.10582900 | -1.65113300 | -3.90975100 |
| H  | -3.07276000 | -3.14671000 | -3.95754100 |
| H  | -3.78781600 | -1.64546100 | -3.30904700 |
| C  | -0.16000200 | -3.72761100 | -2.89281300 |
| H  | -0.60822700 | -4.53498900 | -3.49642800 |
| H  | 0.04241000  | -2.88451200 | -3.57135700 |
| H  | 0.79706200  | -4.09281000 | -2.49626300 |
| F  | -0.54250300 | -0.41327700 | -2.37884500 |
| F  | -2.21090900 | 0.22703600  | 0.17385300  |
| Cl | -4.11878500 | 0.42876500  | 2.26458500  |
| C  | -2.52134800 | 1.44248100  | 1.37721400  |
| O  | -1.58422800 | 1.55647300  | 2.10706500  |
| C  | -3.16582500 | 2.50702100  | 0.55049000  |
| C  | -2.79076100 | 3.83080500  | 0.82452800  |
| C  | -4.11149800 | 2.23967300  | -0.45057500 |
| C  | -3.36420600 | 4.88407300  | 0.10353600  |
| H  | -2.05055900 | 4.02327100  | 1.60313900  |
| C  | -4.67351700 | 3.29286500  | -1.17337300 |
| H  | -4.39667100 | 1.20745100  | -0.64986700 |
| C  | -4.30403600 | 4.61736600  | -0.89702700 |
| H  | -3.07271100 | 5.91383700  | 0.32411000  |
| H  | -5.40641400 | 3.08258700  | -1.95605500 |
| H  | -4.75128700 | 5.43898800  | -1.46189100 |

### <sup>3</sup>B<sub>Co-Cl</sub>

|    |             |             |             |
|----|-------------|-------------|-------------|
| 67 |             |             |             |
| C  | -1.02582800 | -0.46299100 | -1.46851100 |
| H  | -0.94432900 | 0.26440200  | -2.28828800 |
| H  | -0.43766600 | -1.36078800 | -1.70347600 |
| C  | -0.33383200 | 1.97396000  | 0.19586300  |
| P  | -0.14066600 | 0.15723300  | 0.07435100  |
| C  | 0.12062200  | 2.58404300  | 1.38409000  |
| C  | -0.78401300 | 2.78904800  | -0.85759700 |
| C  | -1.15084000 | -0.54913200 | 1.43089800  |
| C  | 0.08506000  | 3.97364800  | 1.52293000  |
| H  | 0.51442300  | 1.96225900  | 2.19238700  |
| C  | -0.81517100 | 4.18138500  | -0.71436200 |
| H  | -1.10582300 | 2.35346900  | -1.80552000 |
| C  | -2.12132200 | 0.20969700  | 2.10679800  |
| C  | -0.97197100 | -1.90704800 | 1.75499000  |
| H  | 0.43264200  | 4.43160400  | 2.45188200  |
| C  | -0.38748400 | 4.77619900  | 0.47653700  |
| H  | -1.17364400 | 4.79954700  | -1.54058800 |
| H  | -2.27338900 | 1.26254700  | 1.86104000  |
| C  | -2.90082800 | -0.38426400 | 3.10615100  |
| H  | -0.21711600 | -2.47695100 | 1.20805600  |
| C  | -1.76032800 | -2.49191500 | 2.74902800  |
| H  | -0.41446800 | 5.86265000  | 0.58714500  |
| H  | -3.65180200 | 0.21212100  | 3.62976700  |
| C  | -2.72183900 | -1.73347600 | 3.42859900  |
| H  | -1.61974100 | -3.54678800 | 2.99708100  |
| H  | -3.33231300 | -2.19451900 | 4.20896400  |
| Co | 2.03698500  | -0.62299700 | 0.06757900  |

|   |            |             |             |    |             |             |             |
|---|------------|-------------|-------------|----|-------------|-------------|-------------|
| C | 3.89891800 | 0.70647600  | -0.17315800 | H  | 2.74098800  | -3.27195100 | -1.56773300 |
| C | 4.20695900 | -0.71723700 | -0.10212000 | C  | 2.13320800  | -0.63999300 | -3.22012500 |
| C | 3.04566900 | 0.90040600  | -1.27063700 | H  | 2.84616000  | -0.59256200 | -4.06239400 |
| C | 3.64313700 | -1.36845300 | -1.25028800 | H  | 1.66946700  | -1.63602800 | -3.23428700 |
| C | 2.85400000 | -0.40279000 | -1.92964300 | H  | 1.35560900  | 0.11266100  | -3.40850700 |
| C | 4.39864700 | 1.73155000  | 0.79583300  | F  | 1.06551300  | -2.25157700 | -0.39399400 |
| H | 3.96493500 | 2.72077700  | 0.59553600  | Cl | 2.09146200  | -0.38078600 | 2.32570700  |
| H | 4.14074700 | 1.44320000  | 1.82706300  | N  | -2.39229300 | -0.91678200 | -1.32038800 |
| H | 5.49647800 | 1.82205700  | 0.73390600  | C  | -3.58566400 | -0.25020500 | -1.18754900 |
| C | 2.55171400 | 2.21077000  | -1.79977700 | N  | -2.61493800 | -2.26159100 | -1.31391600 |
| H | 3.30172400 | 2.63692300  | -2.48929000 | C  | -4.53830600 | -1.29346900 | -1.10420900 |
| H | 1.61729900 | 2.10007600  | -2.36579900 | C  | -3.96833800 | 1.10258100  | -1.13878500 |
| H | 2.38087600 | 2.94089600  | -0.99676800 | N  | -3.87479700 | -2.49721500 | -1.18725400 |
| C | 5.10946900 | -1.32486000 | 0.92358300  | C  | -5.91191200 | -1.01720400 | -0.96859200 |
| H | 5.09266300 | -2.42219200 | 0.88298300  | C  | -5.32925800 | 1.35877500  | -1.00464000 |
| H | 6.14801300 | -0.99049300 | 0.75575900  | H  | -3.24648400 | 1.91601100  | -1.19222300 |
| H | 4.81060200 | -1.00870500 | 1.93419200  | H  | -6.63941600 | -1.82795600 | -0.90552800 |
| C | 3.74229400 | -2.81714400 | -1.61942600 | C  | -6.28984800 | 0.31832600  | -0.92074500 |
| H | 4.13407500 | -2.93639000 | -2.64267100 | H  | -5.66936000 | 2.39602000  | -0.96123600 |
| H | 4.40747900 | -3.36273500 | -0.93616000 | H  | -7.34498800 | 0.58011800  | -0.81617800 |

### Structures optimized at the TPSS (PCM = dichloromethane)/def2-SVP level of theory

#### A<sub>Co-F</sub>

67

|    |             |             |             |
|----|-------------|-------------|-------------|
| C  | -4.50304800 | -1.16426800 | -1.03434600 |
| C  | -0.95464300 | -0.44018200 | -1.39801000 |
| H  | -0.87745700 | 0.33317400  | -2.17809300 |
| H  | -0.38926300 | -1.33411500 | -1.70658600 |
| C  | -0.30318700 | 1.83008300  | 0.55643200  |
| N  | -2.58295700 | -2.18270800 | -0.97806000 |
| N  | -3.85920100 | -2.37288300 | -0.85248500 |
| P  | 0.00563400  | 0.06530000  | 0.15662900  |
| C  | -3.52566900 | -0.16496900 | -1.29078300 |
| C  | -5.87847100 | -0.85022900 | -1.01563300 |
| C  | 0.11132300  | 2.24937200  | 1.84289600  |
| C  | -0.80279400 | 2.78937900  | -0.34637000 |
| N  | -2.33616600 | -0.85843300 | -1.24218100 |
| C  | -0.88292000 | -0.83959300 | 1.49115100  |
| C  | -3.88698500 | 1.17213500  | -1.55210000 |
| C  | -6.23480500 | 0.47390300  | -1.26355500 |
| H  | -6.62479800 | -1.62484700 | -0.81743300 |
| C  | -0.01186400 | 3.59082500  | 2.22430800  |
| H  | 0.54135500  | 1.51456200  | 2.53211300  |
| C  | -0.91958900 | 4.13495300  | 0.03885600  |
| H  | -1.10045300 | 2.50227600  | -1.35914100 |
| C  | -2.03256300 | -0.27610300 | 2.08385200  |
| C  | -0.45314200 | -2.12466900 | 1.88069600  |
| H  | -3.14967400 | 1.94830500  | -1.76404900 |
| C  | -5.25163900 | 1.46559200  | -1.53052500 |
| H  | -7.29087500 | 0.76257700  | -1.25913900 |
| H  | 0.30481600  | 3.90007300  | 3.22608100  |
| C  | -0.53219000 | 4.53693600  | 1.32510800  |
| H  | -1.31761100 | 4.86750600  | -0.67125000 |
| H  | -2.37716200 | 0.72107000  | 1.79102600  |
| C  | -2.74107600 | -0.98943900 | 3.06277200  |
| H  | 0.43090600  | -2.54226500 | 1.39360100  |
| C  | -1.16547500 | -2.82696500 | 2.86215700  |
| H  | -5.57551500 | 2.49289800  | -1.72783000 |
| H  | -0.62945800 | 5.58558400  | 1.62529100  |
| H  | -3.63264400 | -0.54438300 | 3.51769100  |
| C  | -2.30704000 | -2.26426500 | 3.45541200  |
| H  | -0.82599000 | -3.82351800 | 3.16574800  |
| H  | -2.85856300 | -2.81875200 | 4.22273100  |
| Co | 2.14467400  | -0.50102400 | -0.09291400 |

|   |            |             |             |
|---|------------|-------------|-------------|
| C | 3.43012600 | 1.08217200  | -0.27250200 |
| C | 4.19284700 | -0.10591800 | 0.06866000  |
| C | 2.77705300 | 0.83203700  | -1.54283800 |
| C | 3.95036700 | -1.09867300 | -0.92813000 |
| C | 3.05769000 | -0.52337400 | -1.92722600 |
| C | 3.46130600 | 2.37389900  | 0.48999400  |
| H | 2.60584800 | 3.01842300  | 0.23410400  |
| H | 3.43698000 | 2.18890700  | 1.57620600  |
| H | 4.38840300 | 2.93582000  | 0.26426300  |
| C | 2.05148200 | 1.85625600  | -2.36520900 |
| H | 2.78966300 | 2.42856800  | -2.95882200 |
| H | 1.34565900 | 1.39611700  | -3.07506200 |
| H | 1.50492200 | 2.57830800  | -1.73858900 |
| C | 4.95784300 | -0.27449900 | 1.34450000  |
| H | 5.53775600 | -1.21052700 | 1.35281900  |
| H | 5.65009300 | 0.57081600  | 1.50254800  |
| H | 4.23317000 | -0.30075100 | 2.17975400  |
| C | 4.40493200 | -2.52631700 | -0.93641000 |
| H | 4.95367600 | -2.76144600 | -1.86618000 |
| H | 5.05725900 | -2.75326900 | -0.07883600 |
| H | 3.51516500 | -3.18031700 | -0.88522400 |
| C | 2.56796100 | -1.25730400 | -3.13907000 |
| H | 3.39385400 | -1.41989900 | -3.85686000 |
| H | 2.17182400 | -2.24267500 | -2.84138400 |
| H | 1.77021100 | -0.70412100 | -3.65959100 |
| F | 2.06432500 | -0.67287800 | 1.77743600  |
| F | 1.38239600 | -2.21627900 | -0.39700300 |

#### TS<sub>A-B</sub>

81

|   |            |             |             |
|---|------------|-------------|-------------|
| C | 4.87276000 | 0.73580200  | -1.66777600 |
| C | 1.88644400 | -1.29369300 | -1.20265900 |
| H | 2.22528100 | -2.31806400 | -0.98437400 |
| H | 1.26772000 | -1.28370200 | -2.11302300 |
| C | 1.16015200 | -1.43505000 | 1.72122800  |
| N | 2.99251200 | 0.28541100  | -2.66098800 |
| N | 4.08048100 | 0.97878000  | -2.77338000 |
| P | 0.64160500 | -0.71104000 | 0.11108300  |
| C | 4.19763700 | -0.18344900 | -0.82010900 |
| C | 6.14603900 | 1.24061500  | -1.32990600 |
| C | 0.52391700 | -0.95973500 | 2.89182700  |
| C | 2.08349800 | -2.49582900 | 1.83298800  |

|    |             |             |             |
|----|-------------|-------------|-------------|
| N  | 3.02044900  | -0.43573500 | -1.49029800 |
| C  | 1.04733300  | 1.08052300  | 0.21811200  |
| C  | 4.76930300  | -0.62905700 | 0.38897400  |
| C  | 6.71077600  | 0.80000200  | -0.13470300 |
| H  | 6.65842600  | 1.94783000  | -1.98842800 |
| C  | 0.83486500  | -1.51263600 | 4.14183500  |
| H  | -0.22277600 | -0.16267700 | 2.81988100  |
| C  | 2.38705200  | -3.04905200 | 3.08680700  |
| H  | 2.57018200  | -2.91444100 | 0.94698400  |
| C  | 1.84383100  | 1.60823300  | 1.25604400  |
| C  | 0.64897500  | 1.91115700  | -0.85073800 |
| H  | 4.25911100  | -1.32731800 | 1.05494900  |
| C  | 6.02955900  | -0.12019700 | 0.70797600  |
| H  | 7.69748500  | 1.16562200  | 0.16766700  |
| H  | 0.33901600  | -1.12793300 | 5.03929000  |
| C  | 1.76879100  | -2.55593700 | 4.24448600  |
| H  | 3.10888300  | -3.86980800 | 3.15312000  |
| H  | 2.16986500  | 0.97423300  | 2.08571300  |
| C  | 2.23595600  | 2.95440900  | 1.22193700  |
| H  | 0.03167000  | 1.48469400  | -1.64645400 |
| C  | 1.06077300  | 3.24992500  | -0.88239300 |
| H  | 6.50855700  | -0.43968500 | 1.63952800  |
| H  | 2.00796000  | -2.98756200 | 5.22203800  |
| H  | 2.85385700  | 3.35667200  | 2.03196800  |
| C  | 1.85124000  | 3.77489200  | 0.15085400  |
| H  | 0.75319000  | 3.88810300  | -1.71709400 |
| H  | 2.16608400  | 4.82365900  | 0.12346200  |
| Co | -1.41158500 | -1.21592600 | -0.76719600 |
| C  | -2.86854800 | -2.32913800 | 0.21055800  |
| C  | -3.33480000 | -1.98363600 | -1.13077400 |
| C  | -1.67151200 | -3.10312300 | 0.07456200  |
| C  | -2.40658800 | -2.51763800 | -2.07172700 |
| C  | -1.33267900 | -3.16341900 | -1.33647800 |
| C  | -3.60441700 | -2.06677400 | 1.48857800  |
| H  | -2.92443100 | -2.08196400 | 2.35441200  |
| H  | -4.12062300 | -1.09352500 | 1.46555400  |
| H  | -4.36292200 | -2.85999900 | 1.63968900  |
| C  | -0.99571300 | -3.85892800 | 1.17633000  |
| H  | -1.54978700 | -4.80442100 | 1.33385300  |
| H  | 0.04316200  | -4.12023200 | 0.92830200  |
| H  | -1.00155900 | -3.30632400 | 2.12825400  |
| C  | -4.58003900 | -1.21451100 | -1.43782200 |
| H  | -4.58704500 | -0.85436500 | -2.47828500 |
| H  | -5.46109200 | -1.86953900 | -1.29589700 |
| H  | -4.68507300 | -0.35215500 | -0.75825500 |
| C  | -2.43066500 | -2.36111600 | -3.55945900 |
| H  | -2.34663900 | -3.34621900 | -4.05155700 |
| H  | -3.35597000 | -1.87489000 | -3.90326900 |
| H  | -1.57116000 | -1.73979200 | -3.86878300 |
| C  | -0.22760600 | -3.95969500 | -1.96433700 |
| H  | -0.62008400 | -4.94378800 | -2.28565600 |
| H  | 0.17567700  | -3.45877700 | -2.85881800 |
| H  | 0.59744200  | -4.14922400 | -1.26027600 |
| F  | -0.64400000 | -0.39879300 | -2.27597600 |
| F  | -2.21323300 | 0.56069400  | -0.35769500 |
| Cl | -4.63059900 | 1.35509900  | 1.08163700  |
| C  | -2.48158300 | 1.51607800  | 1.10021300  |
| O  | -1.98481200 | 0.97053700  | 2.04002400  |
| C  | -2.29501000 | 2.90859800  | 0.60107300  |
| C  | -1.71096000 | 3.82678800  | 1.49364100  |
| C  | -2.71789200 | 3.33348600  | -0.67253200 |
| C  | -1.55672000 | 5.16822400  | 1.11405400  |
| H  | -1.38803600 | 3.48461000  | 2.48148300  |
| C  | -2.54992900 | 4.67002800  | -1.04835200 |
| H  | -3.17529900 | 2.61024900  | -1.35081100 |
| C  | -1.97374500 | 5.59196400  | -0.15563400 |
| H  | -1.10767400 | 5.88142700  | 1.81366000  |
| H  | -2.87441200 | 4.99915500  | -2.04140700 |
| H  | -1.85354600 | 6.63978500  | -0.45173700 |

### B<sub>Co-Cl</sub>

|    |             |             |             |
|----|-------------|-------------|-------------|
| 67 |             |             |             |
| C  | -0.96995900 | -0.48249800 | -1.45204900 |
| H  | -0.91754500 | 0.23343100  | -2.28757200 |
| H  | -0.36874500 | -1.37561100 | -1.68135700 |
| C  | -0.26128300 | 2.00886400  | 0.15712700  |
| P  | -0.05895600 | 0.18458700  | 0.07404900  |
| C  | 0.25521000  | 2.63635900  | 1.31548100  |
| C  | -0.78609600 | 2.80899300  | -0.87685800 |
| C  | -1.10859200 | -0.45187800 | 1.45200100  |
| C  | 0.21055800  | 4.03044800  | 1.44488200  |
| H  | 0.69995800  | 2.02142000  | 2.10677300  |
| C  | -0.82539900 | 4.20652200  | -0.74405400 |
| H  | -1.15783700 | 2.35772900  | -1.80184300 |
| C  | -2.08946000 | 0.36192700  | 2.05399800  |
| C  | -0.97331300 | -1.79705000 | 1.85649400  |
| H  | 0.60637100  | 4.50302900  | 2.35009800  |
| C  | -0.33363600 | 4.81920000  | 0.41718400  |
| H  | -1.24057500 | 4.81439700  | -1.55481700 |
| H  | -2.21175200 | 1.40513400  | 1.74726900  |
| C  | -2.91904900 | -0.16193000 | 3.05835700  |
| H  | -0.20571900 | -2.40955500 | 1.37528000  |
| C  | -1.81067900 | -2.31227800 | 2.85425400  |
| H  | -0.36744300 | 5.90896400  | 0.51960900  |
| H  | -3.67550700 | 0.48000200  | 3.52265900  |
| C  | -2.78145700 | -1.49802400 | 3.46029700  |
| H  | -1.70019400 | -3.35721400 | 3.16423800  |
| H  | -3.42988000 | -1.90500100 | 4.24396700  |
| Co | 2.05538300  | -0.56707600 | -0.02870000 |
| C  | 3.71423900  | 0.66516900  | -0.11703800 |
| C  | 4.15343500  | -0.72748500 | -0.07894400 |
| C  | 2.91339300  | 0.84543700  | -1.29475900 |
| C  | 3.58137100  | -1.39547800 | -1.20118200 |
| C  | 2.77426600  | -0.44208900 | -1.94322600 |
| C  | 4.15341900  | 1.72836900  | 0.84451200  |
| H  | 3.52493200  | 2.62935400  | 0.76687400  |
| H  | 4.09776200  | 1.35514300  | 1.87992400  |
| H  | 5.19938000  | 2.02236800  | 0.63350400  |
| C  | 2.44794100  | 2.16250600  | -1.83933100 |
| H  | 3.26320400  | 2.59841600  | -2.44838100 |
| H  | 1.56876500  | 2.05926900  | -2.49334900 |
| H  | 2.20682100  | 2.88152500  | -1.04168800 |
| C  | 5.06848200  | -1.30474400 | 0.95716300  |
| H  | 5.17467100  | -2.39476800 | 0.84346600  |
| H  | 6.07216000  | -0.84817200 | 0.87104600  |
| H  | 4.67822400  | -1.09562000 | 1.96812800  |
| C  | 3.66511100  | -2.85306600 | -1.53144700 |
| H  | 4.01157100  | -2.99862900 | -2.57003300 |
| H  | 4.34909000  | -3.38793600 | -0.85493800 |
| H  | 2.65602100  | -3.29290600 | -1.43164600 |
| C  | 2.10758400  | -0.73230900 | -3.25617700 |
| H  | 2.86201500  | -0.75165800 | -4.06628100 |
| H  | 1.61295900  | -1.71736200 | -3.24481400 |
| H  | 1.36053700  | 0.03268400  | -3.51961900 |
| F  | 1.11200400  | -2.20312900 | -0.19347800 |
| Cl | 2.08801600  | -0.55675300 | 2.27085300  |
| N  | -2.32891900 | -0.96328700 | -1.27918900 |
| C  | -3.54387900 | -0.32040200 | -1.18867400 |
| N  | -2.51762300 | -2.32163200 | -1.18731300 |
| C  | -4.47331600 | -1.38494900 | -1.03825300 |
| C  | -3.96328500 | 1.02479200  | -1.22929900 |
| N  | -3.77922800 | -2.57937200 | -1.04514300 |
| C  | -5.85672300 | -1.13462500 | -0.92047400 |
| C  | -5.33513100 | 1.25502000  | -1.11165100 |
| H  | -3.26128600 | 1.85338000  | -1.33763500 |
| H  | -6.56498600 | -1.96008900 | -0.80493900 |
| C  | -6.27048300 | 0.19535300  | -0.95900000 |

|   |             |            |             |
|---|-------------|------------|-------------|
| H | -5.70267900 | 2.28630600 | -1.13648600 |
| H | -7.33484400 | 0.43629200 | -0.87096700 |

### Benzoyl chloride

|    |             |             |             |
|----|-------------|-------------|-------------|
| 14 |             |             |             |
| C  | -0.12766300 | 0.20925100  | -0.00003100 |
| C  | -0.56037900 | -1.13345000 | 0.00000200  |
| C  | -1.92947900 | -1.42324800 | 0.00000600  |
| C  | -2.87130300 | -0.38153900 | -0.00002300 |
| C  | -2.44504800 | 0.95787600  | -0.00005900 |
| C  | -1.08000700 | 1.25630700  | -0.00006400 |
| H  | 0.17937500  | -1.93798500 | 0.00002600  |
| H  | -2.26330600 | -2.46563600 | 0.00003400  |
| H  | -3.94156400 | -0.61346100 | -0.00002000 |
| H  | -3.18007400 | 1.76907700  | -0.00008200 |
| H  | -0.73029400 | 2.29277900  | -0.00008900 |
| C  | 1.29665700  | 0.61262100  | -0.00003600 |
| O  | 1.73176500  | 1.73059300  | 0.00000300  |
| Cl | 2.49324000  | -0.79273100 | 0.00007900  |

### Benzoyl fluoride

|    |             |             |             |
|----|-------------|-------------|-------------|
| 14 |             |             |             |
| C  | 0.23706000  | 0.04420100  | 0.00000600  |
| C  | -0.42880800 | -1.19999300 | 0.00006300  |
| C  | -1.82816200 | -1.23705400 | 0.00002800  |
| C  | -2.56381400 | -0.04054100 | -0.00006400 |
| C  | -1.90230600 | 1.19989200  | -0.00012100 |
| C  | -0.50496500 | 1.24553600  | -0.00008500 |
| H  | 0.15278600  | -2.12544400 | 0.00013300  |
| H  | -2.34750300 | -2.20070900 | 0.00007100  |
| H  | -3.65848500 | -0.07409000 | -0.00009100 |
| H  | -2.47960900 | 2.12998300  | -0.00019300 |
| H  | 0.02950400  | 2.20032200  | -0.00012800 |
| C  | 1.71152600  | 0.13828400  | 0.00004000  |
| O  | 2.39492700  | 1.12678600  | -0.00000500 |
| F  | 2.31341100  | -1.09403300 | 0.00011600  |

### <sup>3</sup>A<sub>Co-F</sub>

|    |             |             |             |
|----|-------------|-------------|-------------|
| 67 |             |             |             |
| C  | -4.51805400 | -1.24446200 | -1.11503700 |
| C  | -0.97566900 | -0.48014900 | -1.46125800 |
| H  | -0.87743000 | 0.26103300  | -2.27072900 |
| H  | -0.40194900 | -1.38314900 | -1.72461300 |
| C  | -0.33490600 | 1.88731800  | 0.34747800  |
| N  | -2.60092400 | -2.26079400 | -1.24995000 |
| N  | -3.87444800 | -2.46683400 | -1.12639200 |
| P  | -0.07106800 | 0.09349600  | 0.10069900  |
| C  | -3.54299800 | -0.21835200 | -1.24174500 |
| C  | -5.89107200 | -0.93614500 | -1.01267300 |
| C  | -0.00562200 | 2.41245100  | 1.61899700  |
| C  | -0.70606000 | 2.77329100  | -0.68614300 |
| N  | -2.35546100 | -0.91107800 | -1.32562200 |
| C  | -1.00265700 | -0.74639000 | 1.44298000  |
| C  | -3.90296500 | 1.14420800  | -1.27327000 |
| C  | -6.24679400 | 0.41082300  | -1.04171900 |
| H  | -6.63576100 | -1.73139000 | -0.91599200 |
| C  | -0.09773900 | 3.78937500  | 1.85838700  |
| H  | 0.34654500  | 1.72925900  | 2.39815600  |
| C  | -0.78758400 | 4.15316000  | -0.44117000 |
| H  | -0.93077500 | 2.40271000  | -1.69131800 |
| C  | -2.08797900 | -0.12040700 | 2.08841400  |
| C  | -0.64322600 | -2.06409300 | 1.79629000  |
| H  | -3.16446400 | 1.94279900  | -1.36492400 |
| C  | -5.26530900 | 1.43137800  | -1.17058500 |
| H  | -7.30098000 | 0.69622300  | -0.96488900 |
| H  | 0.15011700  | 4.18317900  | 2.84989800  |
| C  | -0.49339200 | 4.66294200  | 0.83221200  |
| H  | -1.08436800 | 4.82844100  | -1.25057000 |

|    |             |             |             |
|----|-------------|-------------|-------------|
| H  | -2.38099600 | 0.89949400  | 1.81975800  |
| C  | -2.79793500 | -0.80216500 | 3.08910100  |
| H  | 0.18534900  | -2.54471900 | 1.26739900  |
| C  | -1.35867900 | -2.73655600 | 2.79558000  |
| H  | -5.58858700 | 2.47750100  | -1.18922600 |
| H  | -0.56330700 | 5.73920100  | 1.02197900  |
| H  | -3.63842100 | -0.30762000 | 3.58790000  |
| C  | -2.43296200 | -2.10833200 | 3.44643600  |
| H  | -1.07436700 | -3.75875100 | 3.06826400  |
| H  | -2.98668300 | -2.63758500 | 4.22959500  |
| Co | 2.07199900  | -0.58647600 | 0.04471800  |
| C  | 3.40693800  | 1.05363400  | -0.33191800 |
| C  | 4.17044200  | 0.04391200  | 0.33262800  |
| C  | 2.99169100  | 0.53022500  | -1.64533600 |
| C  | 4.10122800  | -1.13777600 | -0.48315300 |
| C  | 3.46387900  | -0.79760300 | -1.74930100 |
| C  | 3.23527300  | 2.46212500  | 0.15368200  |
| H  | 2.39380400  | 2.97144000  | -0.34163800 |
| H  | 3.05560200  | 2.47903000  | 1.24047500  |
| H  | 4.15073400  | 3.05202900  | -0.04861600 |
| C  | 2.33122700  | 1.34230800  | -2.72296800 |
| H  | 3.09511200  | 1.90020500  | -3.29837200 |
| H  | 1.77535900  | 0.70925100  | -3.43346300 |
| H  | 1.63707500  | 2.08858100  | -2.30320700 |
| C  | 4.78014200  | 0.17861100  | 1.69738000  |
| H  | 5.36789900  | -0.71302900 | 1.96869500  |
| H  | 5.44921100  | 1.05654400  | 1.74666800  |
| H  | 3.97332300  | 0.30741100  | 2.44096800  |
| C  | 4.64542000  | -2.49883900 | -0.16539200 |
| H  | 5.47529100  | -2.75978300 | -0.84867200 |
| H  | 5.01738600  | -2.56047000 | 0.86915500  |
| H  | 3.85389100  | -3.25755200 | -0.29727300 |
| C  | 3.23083200  | -1.77603600 | -2.86066500 |
| H  | 4.18273400  | -2.21837800 | -3.20728300 |
| H  | 2.58676500  | -2.59853500 | -2.49920500 |
| H  | 2.73875800  | -1.30283900 | -3.72520200 |
| F  | 1.80914400  | -0.14917200 | 1.93143700  |
| F  | 1.36176700  | -2.26170600 | -0.43379800 |

### <sup>3</sup>TS<sub>A-B</sub>

|    |             |             |             |
|----|-------------|-------------|-------------|
| 81 |             |             |             |
| C  | 4.99539500  | 1.41145600  | -1.49290000 |
| C  | 2.18421400  | -0.88533900 | -1.22841400 |
| H  | 2.60420300  | -1.88681800 | -1.04577000 |
| H  | 1.59582100  | -0.89722000 | -2.15882100 |
| C  | 1.43356400  | -1.03970900 | 1.71055100  |
| N  | 3.08653600  | 0.99733400  | -2.44711300 |
| N  | 4.11326600  | 1.78536800  | -2.48857200 |
| P  | 0.85983300  | -0.45665400 | 0.06721100  |
| C  | 4.44669600  | 0.30223000  | -0.79432700 |
| C  | 6.25362300  | 1.94474400  | -1.14275500 |
| C  | 0.77446000  | -0.53466400 | 2.85634600  |
| C  | 2.41747900  | -2.03833300 | 1.87285500  |
| N  | 3.24607900  | 0.08081300  | -1.43477300 |
| C  | 0.95678500  | 1.37481100  | 0.11539900  |
| C  | 5.13722500  | -0.31517200 | 0.26810300  |
| C  | 6.93334300  | 1.33762100  | -0.08873100 |
| H  | 6.66818300  | 2.79853500  | -1.68629700 |
| C  | 1.12337000  | -1.00012700 | 4.13159200  |
| H  | -0.01328200 | 0.21889100  | 2.74861600  |
| C  | 2.75999400  | -2.50002300 | 3.15290700  |
| H  | 2.92222400  | -2.47478200 | 1.00618700  |
| C  | 1.82138100  | 2.04299000  | 1.00711100  |
| C  | 0.21244300  | 2.11258800  | -0.82755000 |
| H  | 4.73139100  | -1.16814800 | 0.81424100  |
| C  | 6.38089600  | 0.22457100  | 0.60151200  |
| H  | 7.91307200  | 1.71828900  | 0.21758500  |
| H  | 0.60981000  | -0.59523000 | 5.00997500  |



|    |             |             |             |    |             |             |             |
|----|-------------|-------------|-------------|----|-------------|-------------|-------------|
| C  | 2.11794000  | -1.97902400 | 4.28545300  | H  | -1.07973800 | 2.34377500  | -1.81427000 |
| H  | 3.53104200  | -3.27012900 | 3.26003100  | C  | -2.11489100 | 0.21619200  | 2.11093500  |
| H  | 2.40628400  | 1.47972500  | 1.74088700  | C  | -0.95867100 | -1.90813700 | 1.78127000  |
| C  | 1.93332100  | 3.43981000  | 0.95665300  | H  | 0.41782600  | 4.45040300  | 2.45898600  |
| H  | -0.44213500 | 1.58276100  | -1.52416100 | C  | -0.39324200 | 4.78466100  | 0.47194900  |
| C  | 0.33529200  | 3.50774400  | -0.87264200 | H  | -1.16799200 | 4.79627600  | -1.55590200 |
| H  | 6.94951600  | -0.22504400 | 1.42229300  | H  | -2.26747300 | 1.26921800  | 1.85514400  |
| H  | 2.38722500  | -2.33893300 | 5.28400300  | C  | -2.90103000 | -0.37241200 | 3.11380600  |
| H  | 2.60524000  | 3.95366700  | 1.65234800  | H  | -0.20004900 | -2.48372400 | 1.24089100  |
| C  | 1.19186000  | 4.17331800  | 0.01761000  | C  | -1.75296300 | -2.48697600 | 2.77934700  |
| H  | -0.24541300 | 4.07696200  | -1.60593200 | H  | -0.42912300 | 5.87383400  | 0.57956400  |
| H  | 1.28257800  | 5.26429500  | -0.01977200 | H  | -3.65728600 | 0.22905400  | 3.62960700  |
| Co | -1.13062700 | -1.27488100 | -0.85249200 | C  | -2.72143700 | -1.72215300 | 3.44989000  |
| C  | -2.03123200 | -2.87848100 | 0.26226900  | H  | -1.61197400 | -3.54223700 | 3.03725700  |
| C  | -2.95622500 | -2.46942100 | -0.75089800 | H  | -3.33659300 | -2.17846600 | 4.23309200  |
| C  | -0.85668100 | -3.47194500 | -0.39803700 | Co | 2.02227600  | -0.59803000 | 0.05858100  |
| C  | -2.29233700 | -2.64721400 | -2.01703900 | C  | 3.90093100  | 0.69454000  | -0.18294200 |
| C  | -1.02350800 | -3.33550300 | -1.79334500 | C  | 4.20285100  | -0.72273500 | -0.09743100 |
| C  | -2.28792400 | -2.87819100 | 1.73926300  | C  | 3.02446000  | 0.87626700  | -1.28249800 |
| H  | -1.34825600 | -2.83797400 | 2.31349200  | C  | 3.63007600  | -1.38774400 | -1.24543700 |
| H  | -2.91446200 | -2.01895800 | 2.03094700  | C  | 2.85119800  | -0.42480000 | -1.94727400 |
| H  | -2.81558400 | -3.80806200 | 2.02952500  | C  | 4.39994800  | 1.73728400  | 0.77293400  |
| C  | 0.21375000  | -4.24094300 | 0.31323700  | H  | 3.95283800  | 2.72263000  | 0.56717300  |
| H  | -0.16677600 | -5.25525200 | 0.54219200  | H  | 4.15652500  | 1.45751800  | 1.81308100  |
| H  | 1.12076600  | -4.35750100 | -0.30072700 | H  | 5.49902200  | 1.83991500  | 0.69809500  |
| H  | 0.49123800  | -3.77688300 | 1.27215400  | C  | 2.53954100  | 2.19010800  | -1.82051100 |
| C  | -4.34780300 | -1.95813400 | -0.53272000 | H  | 3.30744300  | 2.61792900  | -2.49397900 |
| H  | -4.71004900 | -1.39260500 | -1.40636400 | H  | 1.61555500  | 2.08005000  | -2.40870700 |
| H  | -5.03861500 | -2.80993200 | -0.38047000 | H  | 2.35169900  | 2.92174700  | -1.01887400 |
| H  | -4.40160900 | -1.30600100 | 0.35449000  | C  | 5.10026400  | -1.33139600 | 0.93745800  |
| C  | -2.81536000 | -2.29013800 | -3.37329500 | H  | 5.07718900  | -2.43178900 | 0.90339700  |
| H  | -3.01805300 | -3.20612500 | -3.95907400 | H  | 6.14482500  | -1.00412400 | 0.77385200  |
| H  | -3.74507700 | -1.70443400 | -3.31293800 | H  | 4.79767800  | -1.00730700 | 1.94784600  |
| H  | -2.06179200 | -1.69821900 | -3.92113000 | C  | 3.73031300  | -2.84284100 | -1.59764300 |
| C  | -0.08479800 | -3.75330500 | -2.88442100 | H  | 4.09807500  | -2.97425900 | -2.63135100 |
| H  | -0.51856000 | -4.58326400 | -3.47347700 | H  | 4.41509700  | -3.37851100 | -0.92132700 |
| H  | 0.09900200  | -2.91825300 | -3.58255900 | H  | 2.72907400  | -3.30215900 | -1.51847400 |
| H  | 0.88327500  | -4.09230000 | -2.48343700 | C  | 2.13732200  | -0.67169400 | -3.24435300 |
| F  | -0.54143800 | -0.42248600 | -2.38534800 | H  | 2.85691000  | -0.64068100 | -4.08571800 |
| F  | -2.19588200 | 0.16276600  | 0.21909900  | H  | 1.66173600  | -1.66582000 | -3.25225100 |
| Cl | -4.21117800 | 0.35140200  | 2.26690700  | H  | 1.36584100  | 0.08778300  | -3.44736900 |
| C  | -2.57030100 | 1.40279400  | 1.39463500  | F  | 1.07165000  | -2.24883000 | -0.38098200 |
| O  | -1.66349700 | 1.54574900  | 2.16283100  | Cl | 2.08797500  | -0.34479200 | 2.32613900  |
| C  | -3.22668500 | 2.44117800  | 0.54411700  | N  | -2.38479000 | -0.92470300 | -1.31344200 |
| C  | -2.95702400 | 3.78476200  | 0.86807100  | C  | -3.58321400 | -0.25524700 | -1.19527200 |
| C  | -4.08562900 | 2.13655900  | -0.52783800 | N  | -2.60851000 | -2.28103400 | -1.28203800 |
| C  | -3.55066200 | 4.81752900  | 0.12756000  | C  | -4.53992500 | -1.30116400 | -1.09449800 |
| H  | -2.28276300 | 4.00784700  | 1.70035500  | C  | -3.96730000 | 1.10090300  | -1.17337900 |
| C  | -4.66722600 | 3.17116900  | -1.26927800 | N  | -3.87650900 | -2.51171100 | -1.15352000 |
| H  | -4.28538300 | 1.09070600  | -0.76810600 | C  | -5.91673900 | -1.02088300 | -0.96756500 |
| C  | -4.40476000 | 4.51357000  | -0.94264500 | C  | -5.33315400 | 1.36074900  | -1.04725900 |
| H  | -3.34163600 | 5.86101200  | 0.38714500  | H  | -3.24342900 | 1.91507200  | -1.24089700 |
| H  | -5.33135500 | 2.93167500  | -2.10677000 | H  | -6.64634800 | -1.83214400 | -0.89107700 |
| H  | -4.86717000 | 5.31967900  | -1.52259800 | C  | -6.29596200 | 0.31978100  | -0.94581300 |
|    |             |             |             | H  | -5.67381700 | 2.40127300  | -1.02451200 |
|    |             |             |             | H  | -7.35400700 | 0.58387900  | -0.84869000 |

<sup>3</sup>B<sub>Co-Cl</sub>

|    |             |             |             |
|----|-------------|-------------|-------------|
| 67 |             |             |             |
| C  | -1.01438600 | -0.47269700 | -1.46603200 |
| H  | -0.93421900 | 0.25673400  | -2.28758900 |
| H  | -0.42589300 | -1.37390600 | -1.69924400 |
| C  | -0.31653700 | 1.97422200  | 0.19878600  |
| P  | -0.11929400 | 0.15193100  | 0.08214100  |
| C  | 0.12617200  | 2.59267600  | 1.39197300  |
| C  | -0.76687800 | 2.78547900  | -0.86322100 |
| C  | -1.13697600 | -0.54908800 | 1.44458200  |
| C  | 0.07935800  | 3.98622800  | 1.52659600  |
| H  | 0.51949700  | 1.97392600  | 2.20625200  |
| C  | -0.80957800 | 4.18171400  | -0.72345000 |
